# Supplementary material for: Organocatalytic kinetic resolution via intramolecular aldol reactions: Enantioselective synthesis of both enantiomers of chiral cyclohexenones
Source: Royal Society of Chemistry journal article supplement (doi:10.1039/b927343c), 2010-01-01
Supplement: b927343c.pdf [file b927343c.pdf]

# Supplementary Material (ESI) for Organic and Biomolecular Chemistry  
# This journal is © The Royal Society of Chemistry 2010

## Supporting Information for

# **Organocatalytic Kinetic Resolution via Intramolecular Aldol Reactions: Enantioselective Synthesis of Both Enantiomers of Chiral Cyclohexenones**

*Liujuan Chen,<sup>a</sup> Sanzhong Luo,<sup>\*a</sup> Jiuyuan Li,<sup>a</sup> Xin Li,<sup>a</sup> Jin-Pei Cheng<sup>\*a</sup>*

<sup>a</sup> Beijing National Laboratory for Molecular Sciences (BNLMS), Center for Molecular Science, Institute of Chemistry, Chinese Academy of Sciences, Beijing, 100190, China.

[luosz@iccas.ac.cn](mailto:luosz@iccas.ac.cn)

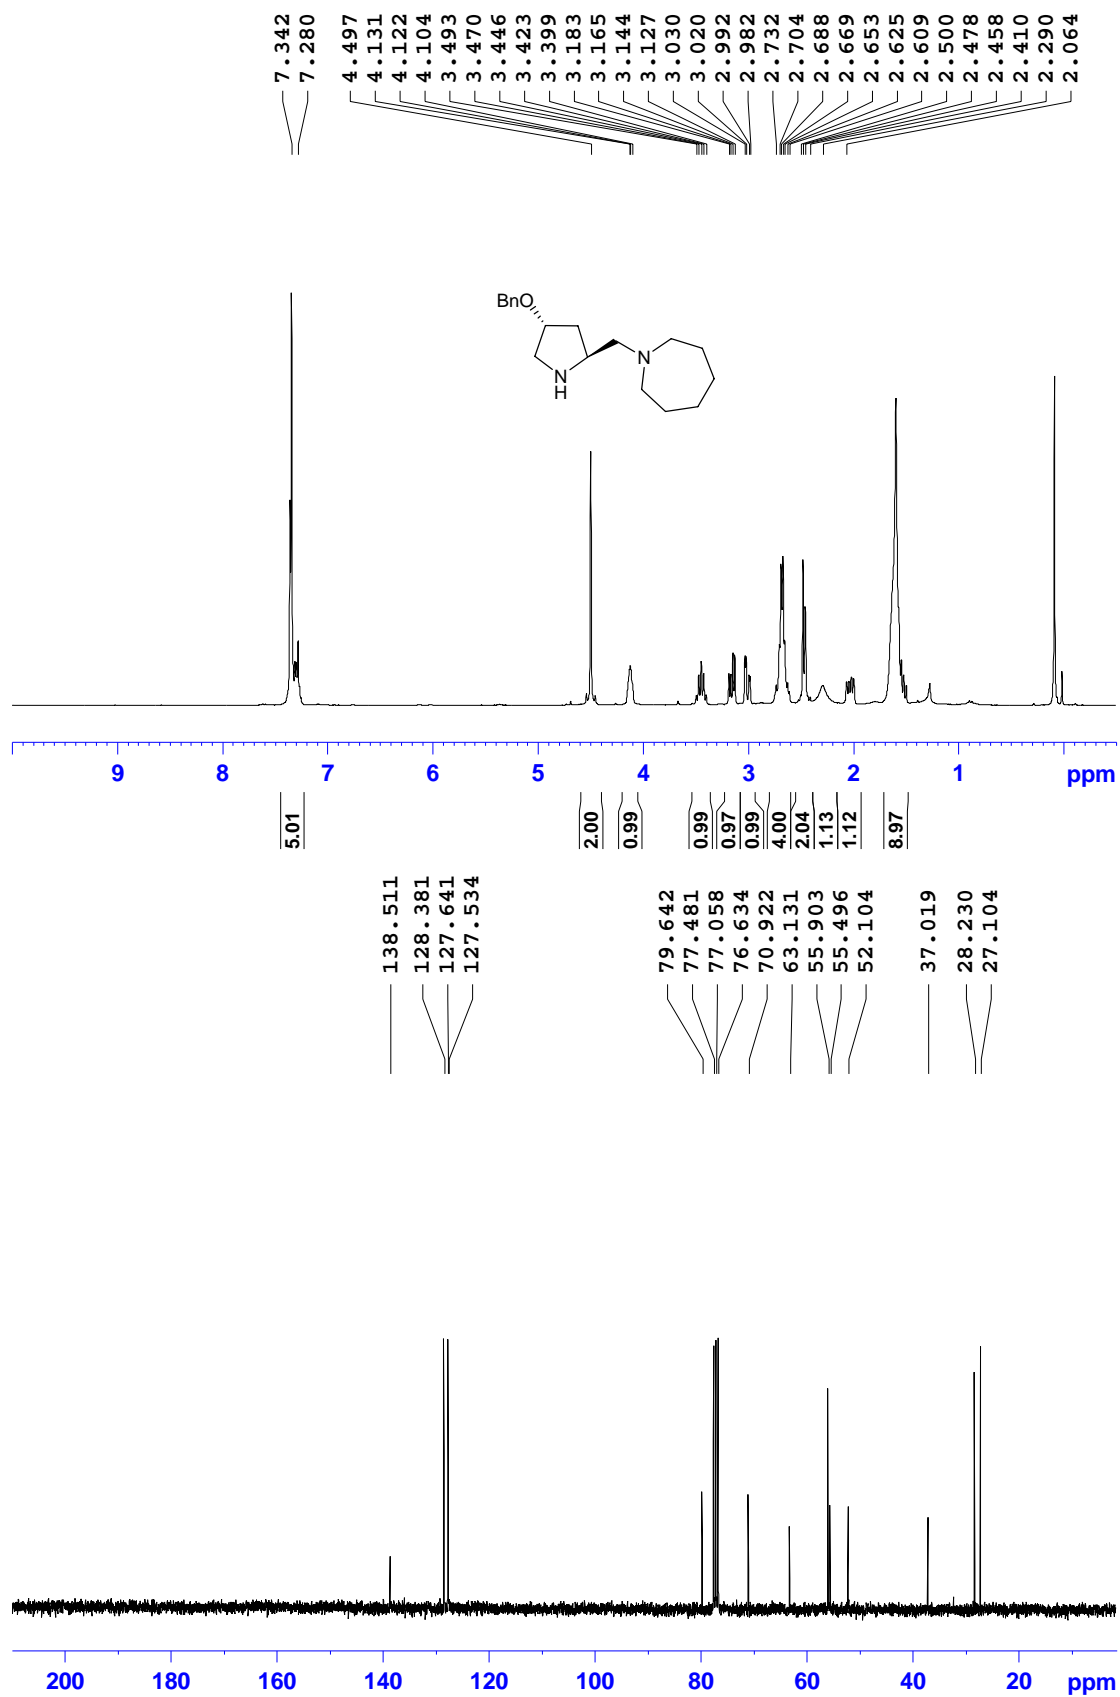

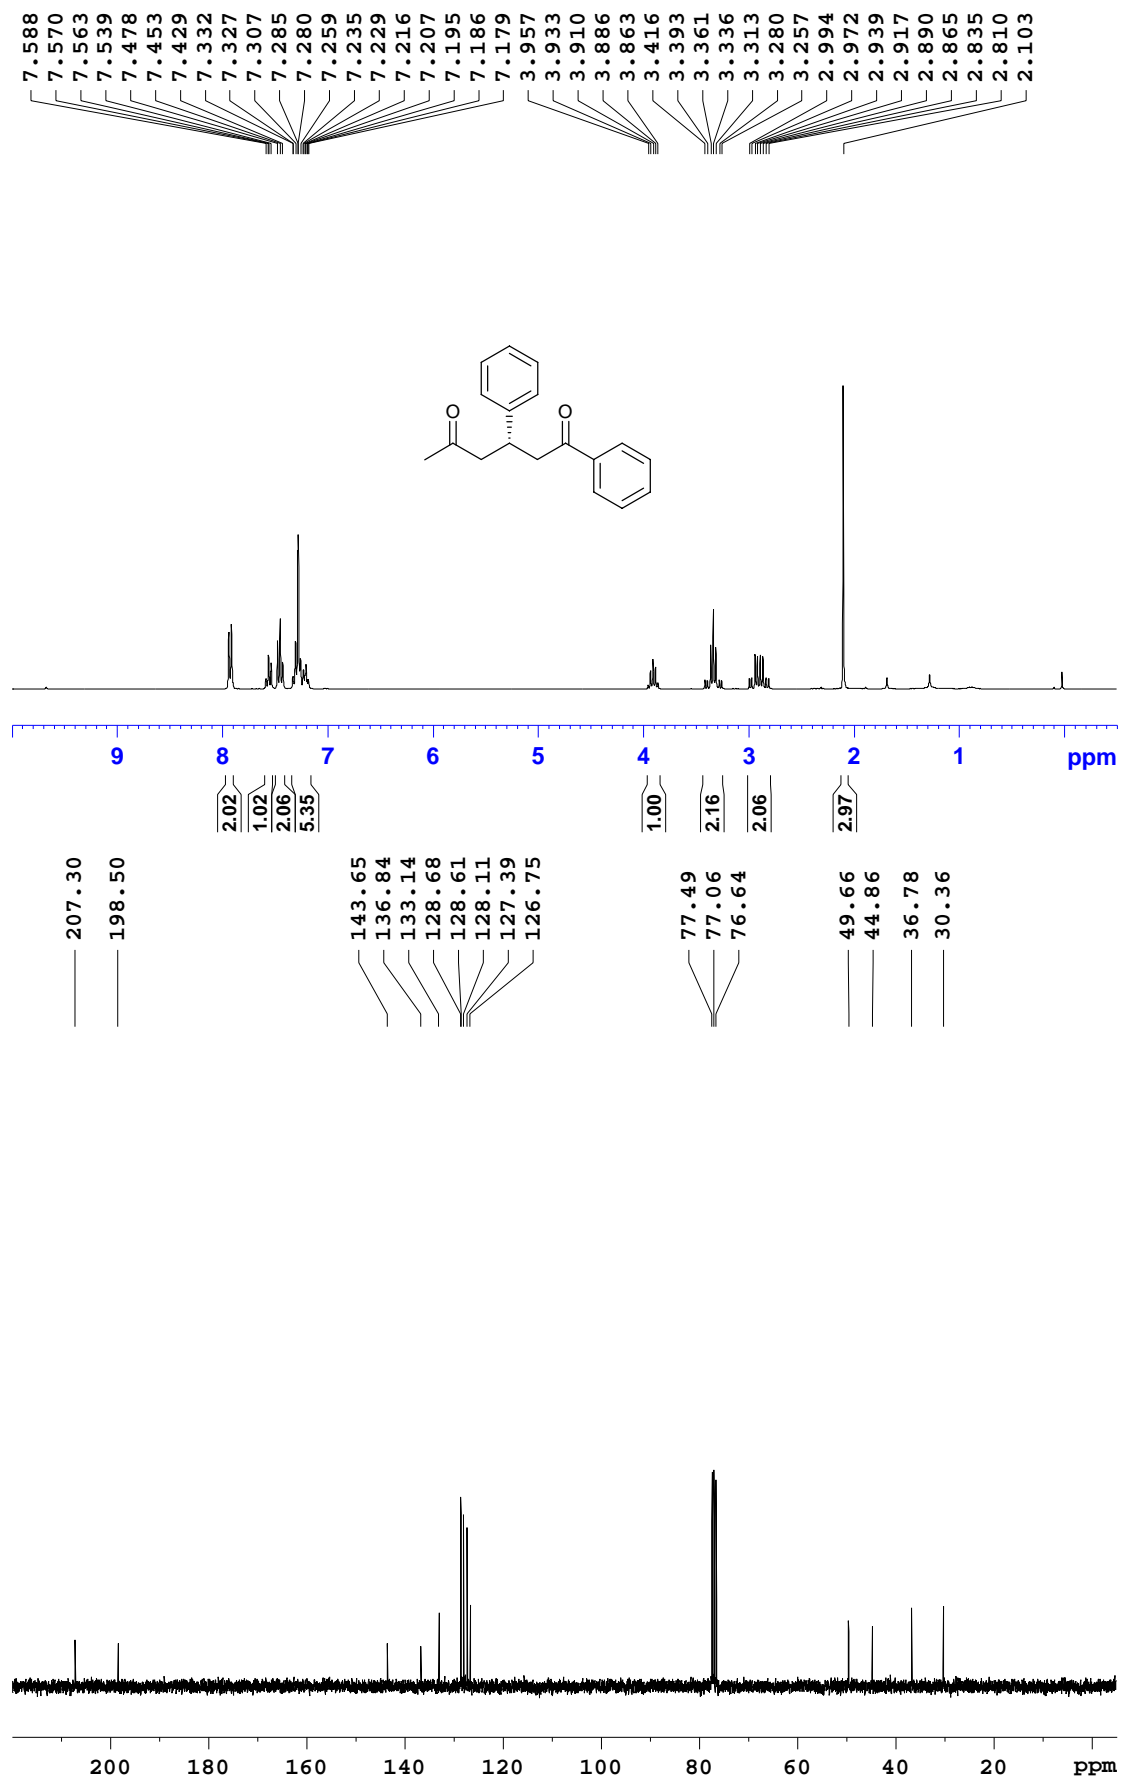

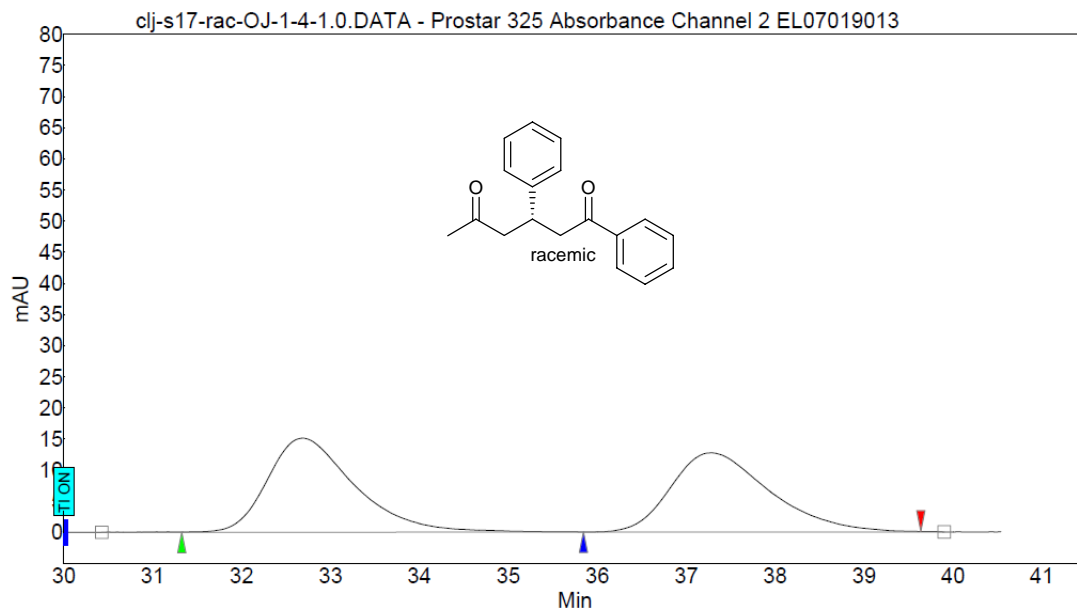

Peak results :

| Index | Name    | Time [Min] | Quantity [% Area] | Height [mAU] | Area [mAU.Min] | Area % [%] |
|-------|---------|------------|-------------------|--------------|----------------|------------|
| 1     | UNKNOWN | 32.69      | 51.19             | 15.1         | 17.2           | 51.188     |
| 2     | UNKNOWN | 37.28      | 48.81             | 12.7         | 16.4           | 48.812     |
| Total |         |            | 100.00            | 27.8         | 33.5           | 100.000    |

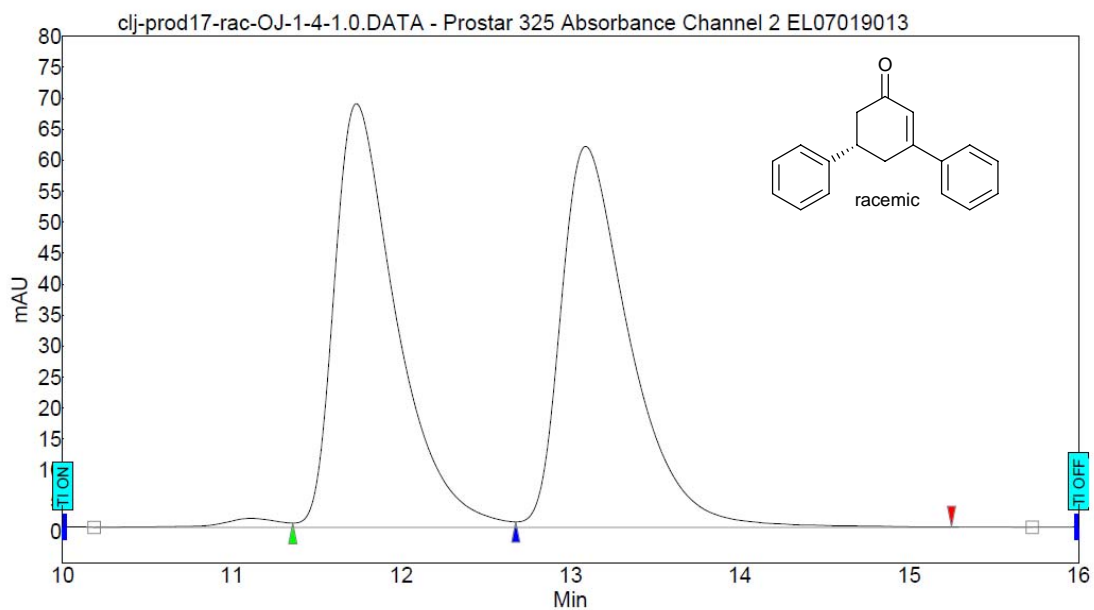

Peak results :

| Index | Name    | Time [Min] | Quantity [% Area] | Height [mAU] | Area [mAU.Min] | Area % [%] |
|-------|---------|------------|-------------------|--------------|----------------|------------|
| 1     | UNKNOWN | 11.74      | 50.00             | 68.4         | 29.0           | 50.001     |
| 2     | UNKNOWN | 13.09      | 50.00             | 61.5         | 29.0           | 49.999     |
| Total |         |            | 100.00            | 129.8        | 58.0           | 100.000    |

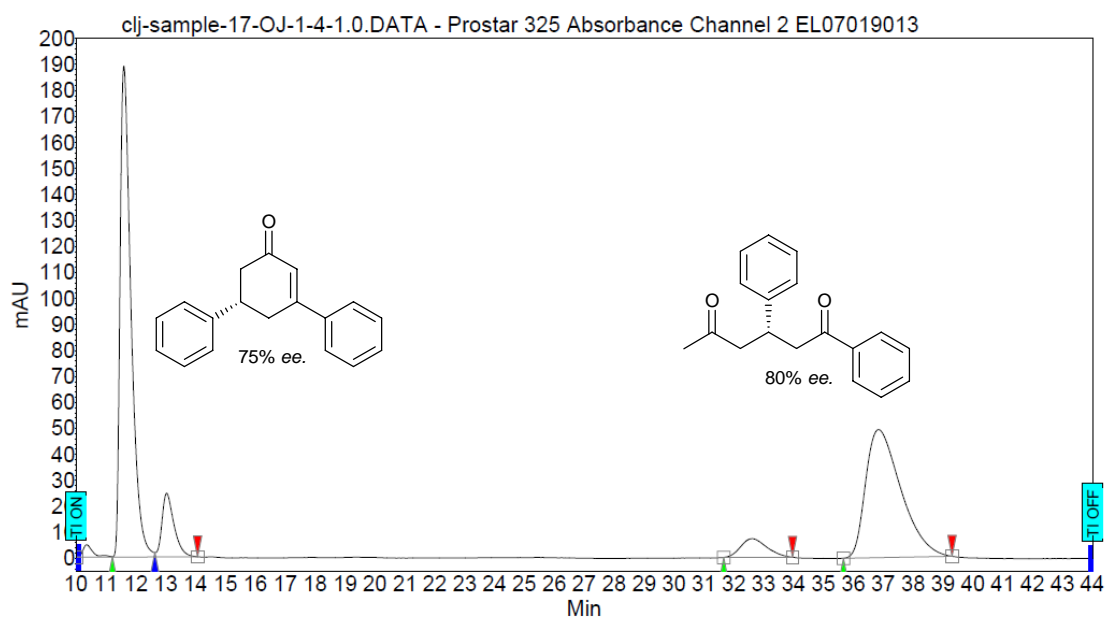

**Peak results :**

| Index | Name    | Time [Min] | Quantity [% Area] | Height [mAU] | Area [mAU.Min] | Area % [%] |
|-------|---------|------------|-------------------|--------------|----------------|------------|
| 1     | UNKNOWN | 11.60      | 48.27             | 188.9        | 80.4           | 48.267     |
| 2     | UNKNOWN | 13.03      | 6.91              | 24.5         | 11.5           | 6.911      |
| 3     | UNKNOWN | 32.62      | 4.38              | 7.2          | 7.3            | 4.381      |
| 4     | UNKNOWN | 36.84      | 40.44             | 49.3         | 67.4           | 40.441     |
| Total |         |            | 100.00            | 269.9        | 166.6          | 100.000    |

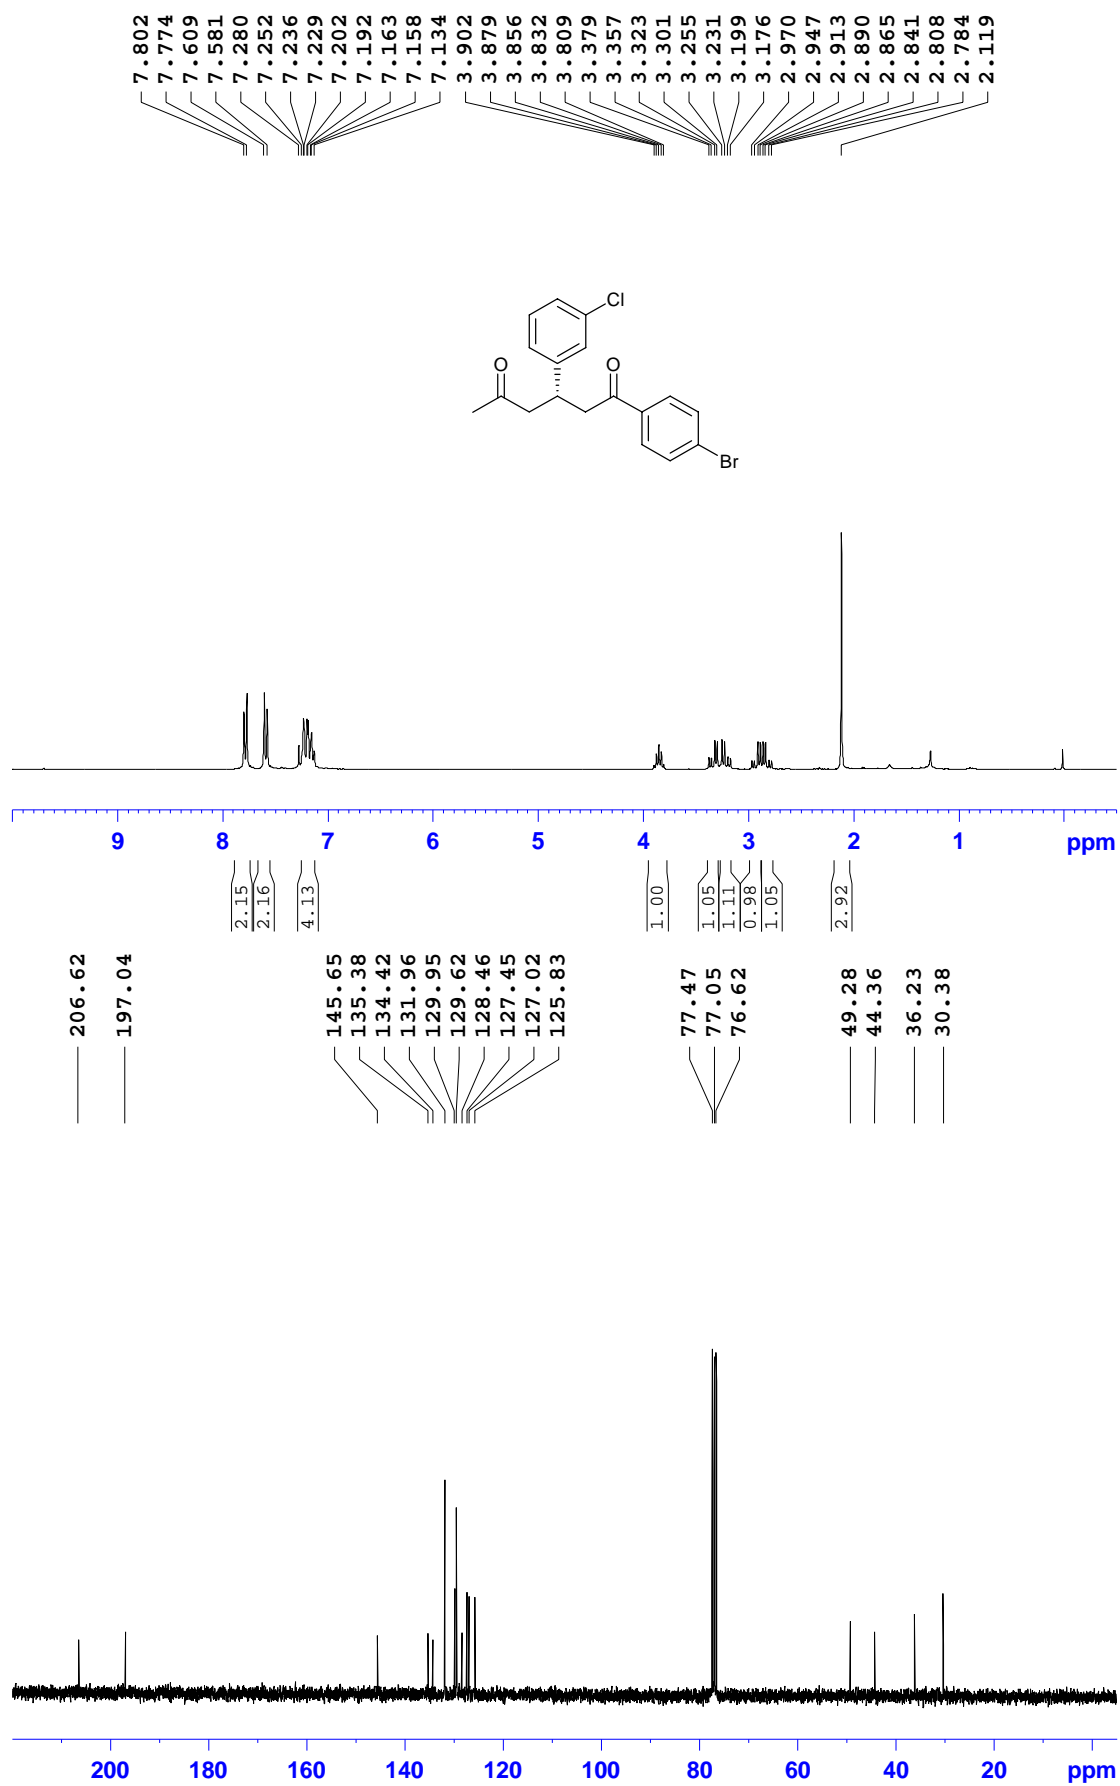

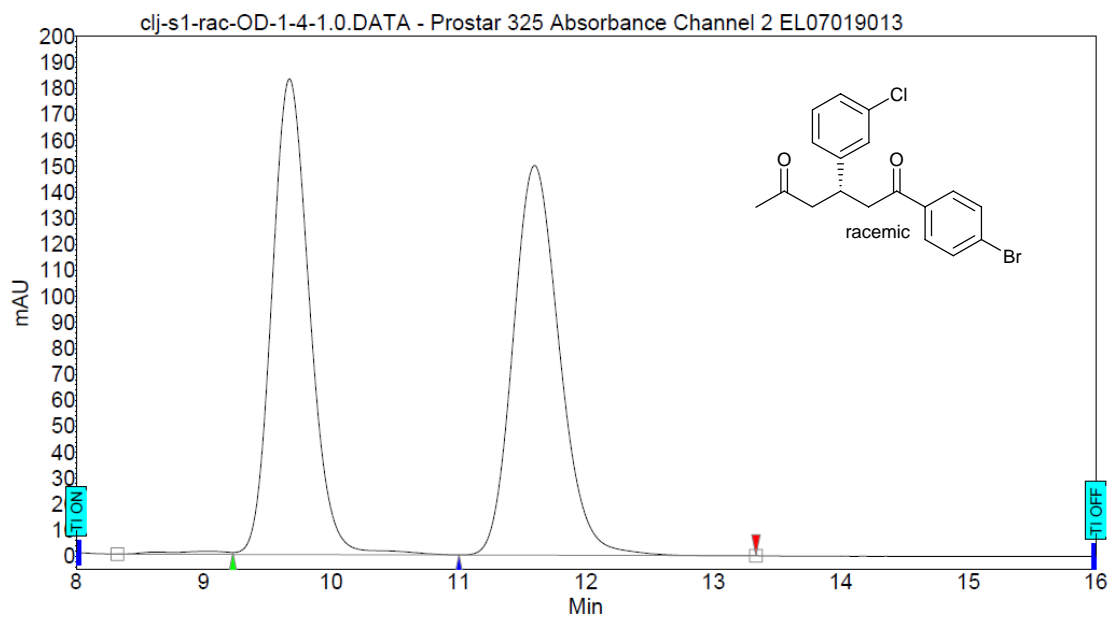

Peak results :

| Index | Name    | Time [Min] | Quantity [% Area] | Height [mAU] | Area [mAU.Min] | Area % [%] |
|-------|---------|------------|-------------------|--------------|----------------|------------|
| 1     | UNKNOWN | 9.67       | 49.85             | 183.0        | 62.6           | 49.850     |
| 2     | UNKNOWN | 11.60      | 50.15             | 149.9        | 63.0           | 50.150     |
| Total |         |            | 100.00            | 333.0        | 125.6          | 100.000    |

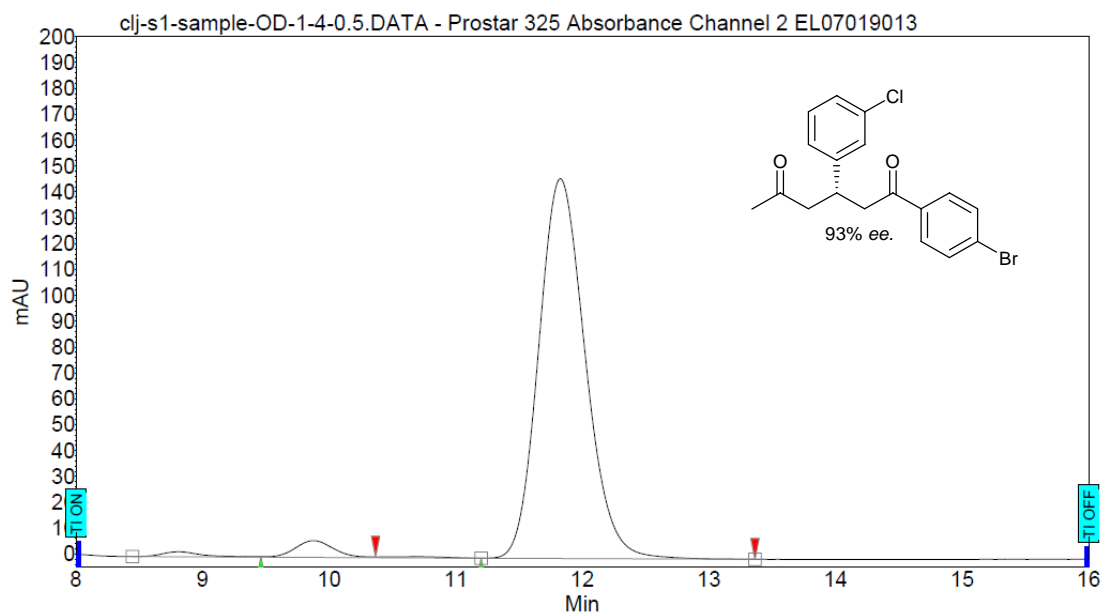

Peak results :

| Index | Name    | Time [Min] | Quantity [% Area] | Height [mAU] | Area [mAU.Min] | Area % [%] |
|-------|---------|------------|-------------------|--------------|----------------|------------|
| 1     | UNKNOWN | 9.88       | 3.53              | 6.5          | 2.3            | 3.532      |
| 2     | UNKNOWN | 11.83      | 96.47             | 146.8        | 62.5           | 96.468     |
| Total |         |            | 100.00            | 153.4        | 64.7           | 100.000    |

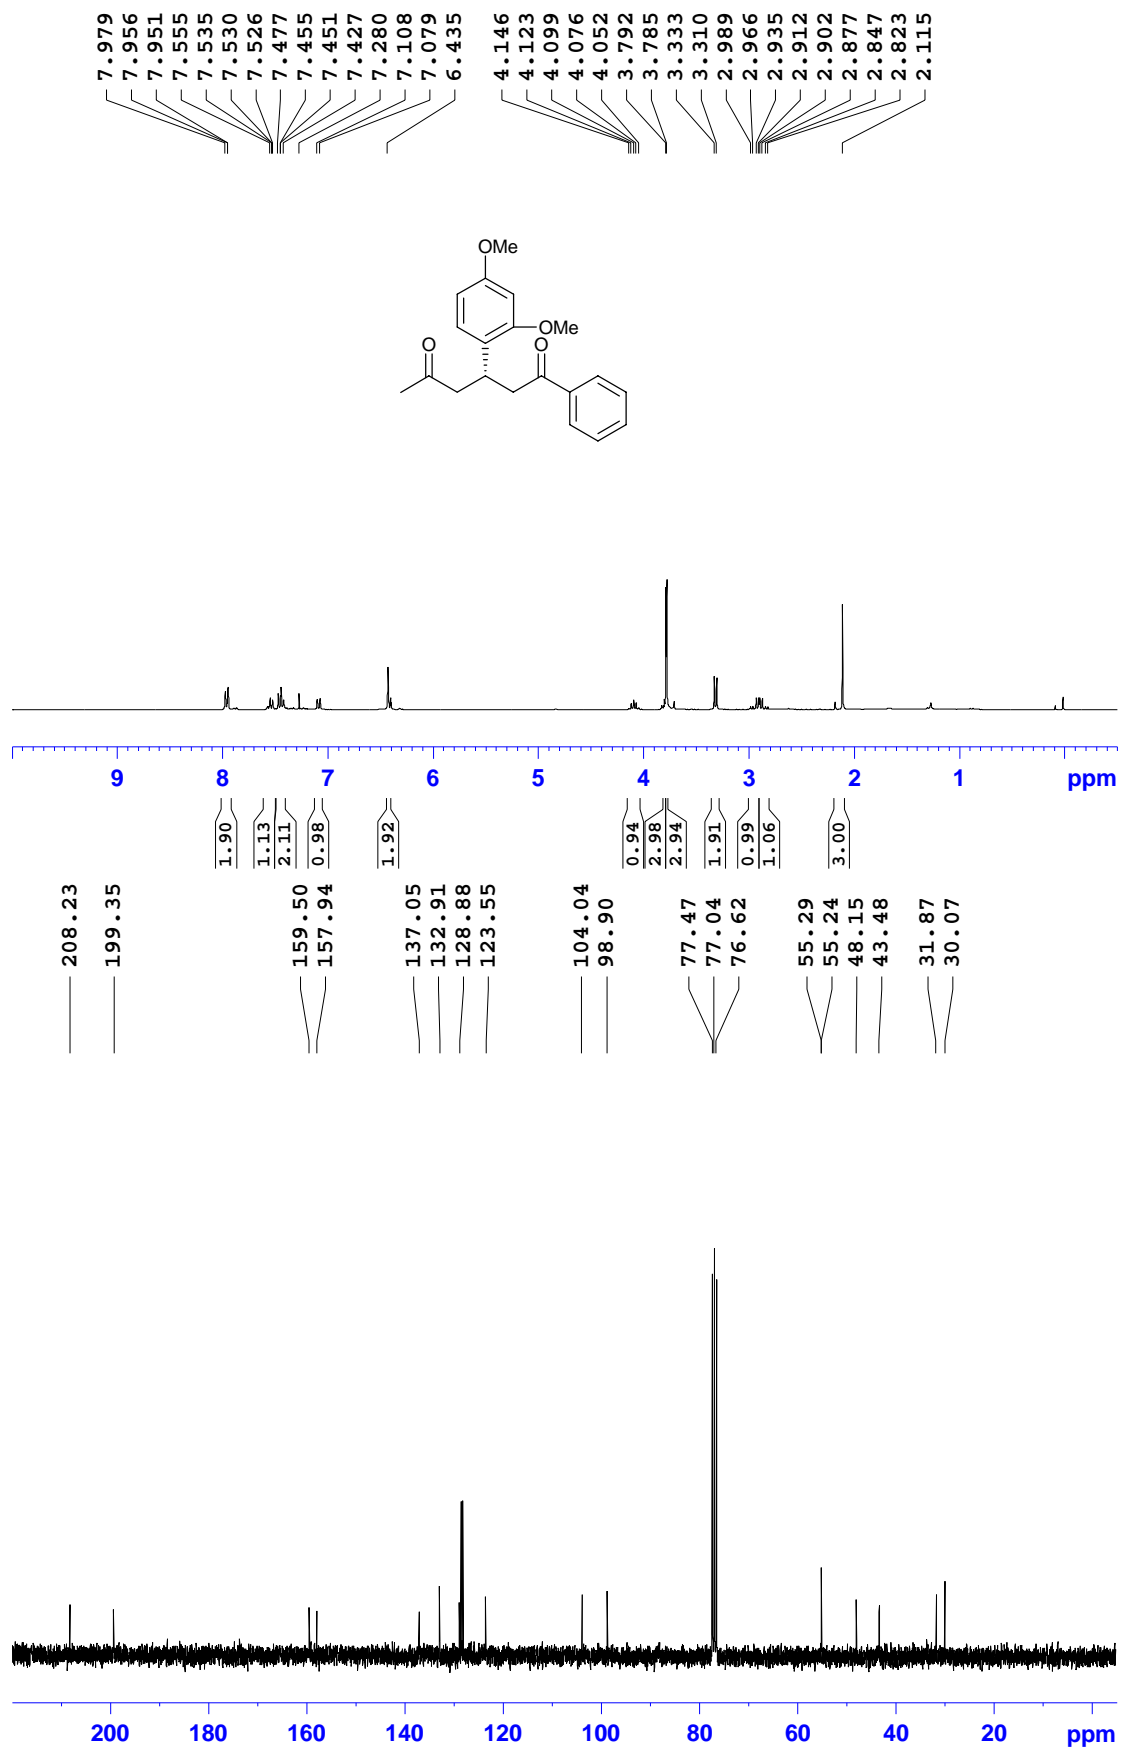



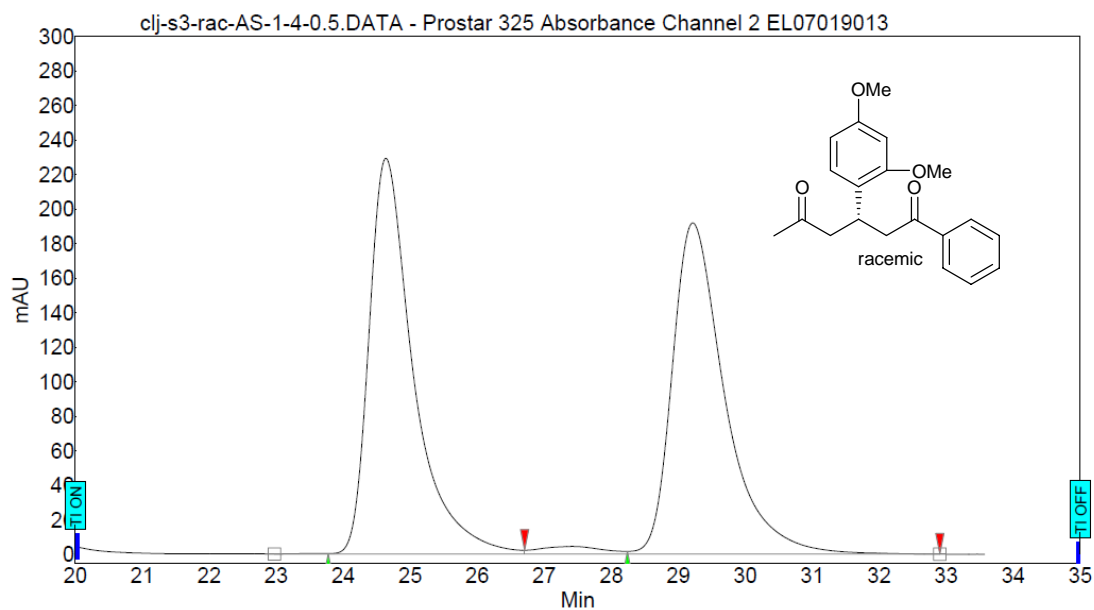

Peak results :

| Index | Name    | Time [Min] | Quantity [% Area] | Height [mAU] | Area [mAU.Min] | Area % [%] |
|-------|---------|------------|-------------------|--------------|----------------|------------|
| 1     | UNKNOWN | 24.63      | 50.13             | 229.2        | 175.1          | 50.127     |
| 2     | UNKNOWN | 29.22      | 49.87             | 191.8        | 174.2          | 49.873     |
| Total |         |            | 100.00            | 420.9        | 349.2          | 100.000    |

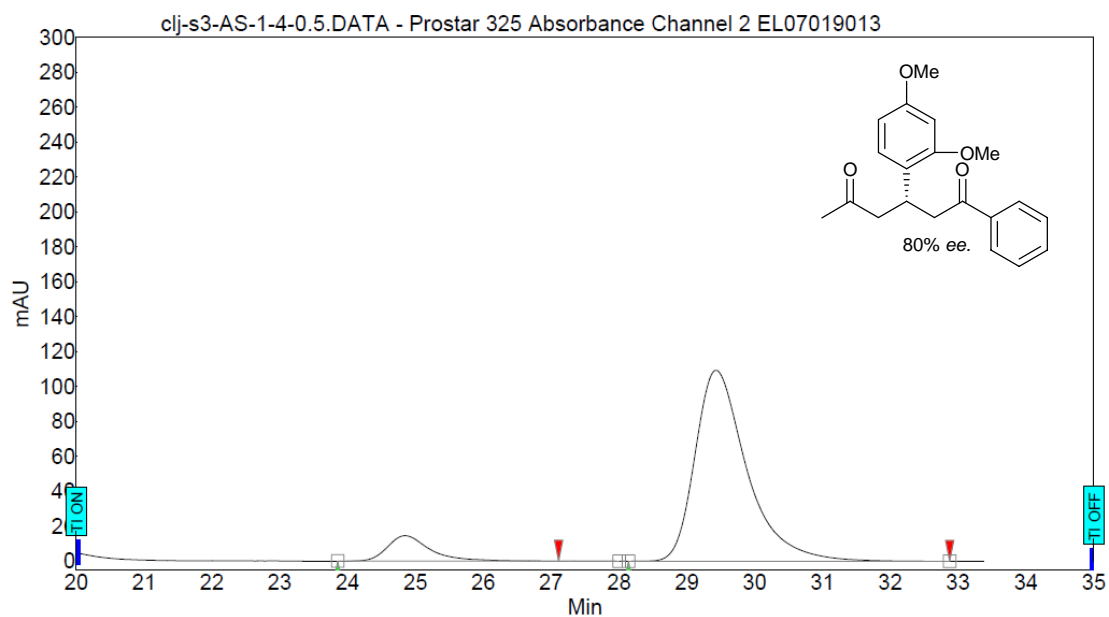

Peak results :

| Index | Name    | Time [Min] | Quantity [% Area] | Height [mAU] | Area [mAU.Min] | Area % [%] |
|-------|---------|------------|-------------------|--------------|----------------|------------|
| 1     | UNKNOWN | 24.85      | 9.92              | 14.6         | 10.7           | 9.922      |
| 2     | UNKNOWN | 29.43      | 90.08             | 109.4        | 96.9           | 90.078     |
| Total |         |            | 100.00            | 124.0        | 107.6          | 100.000    |

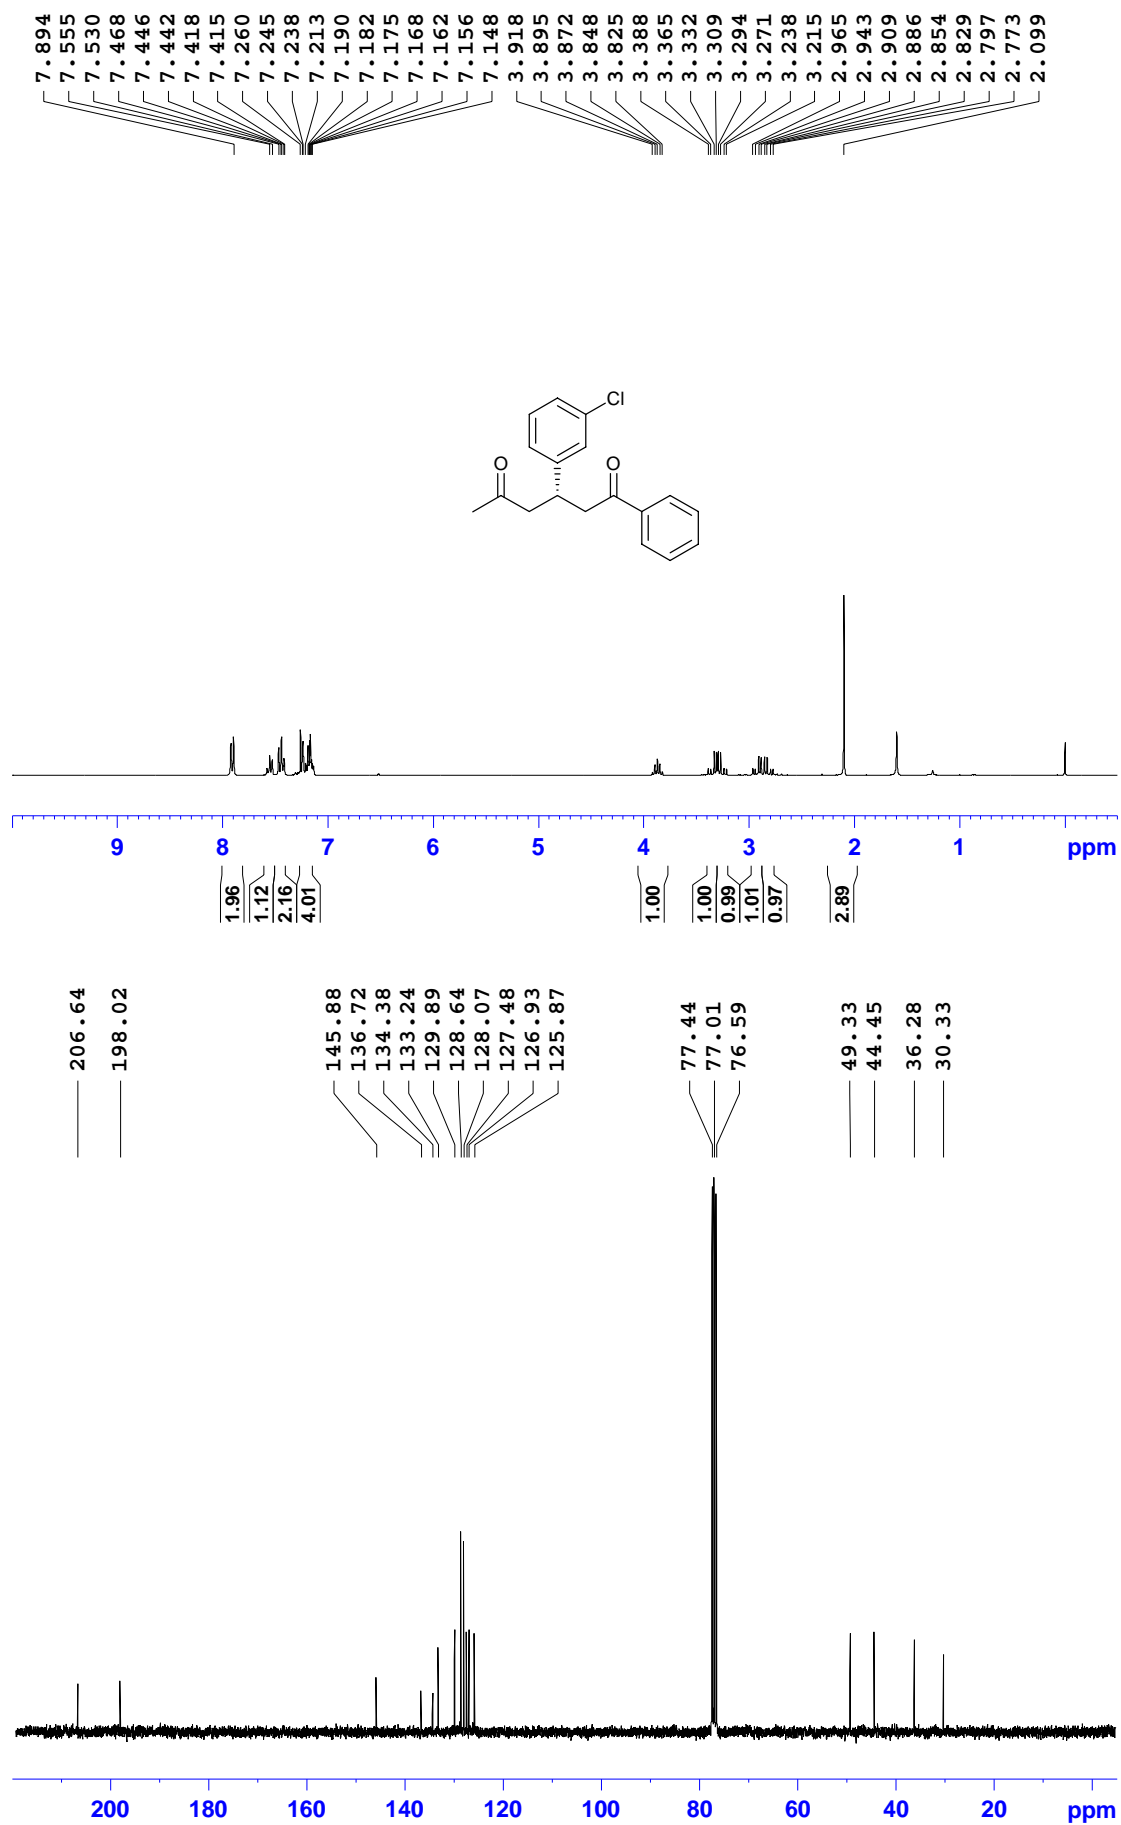

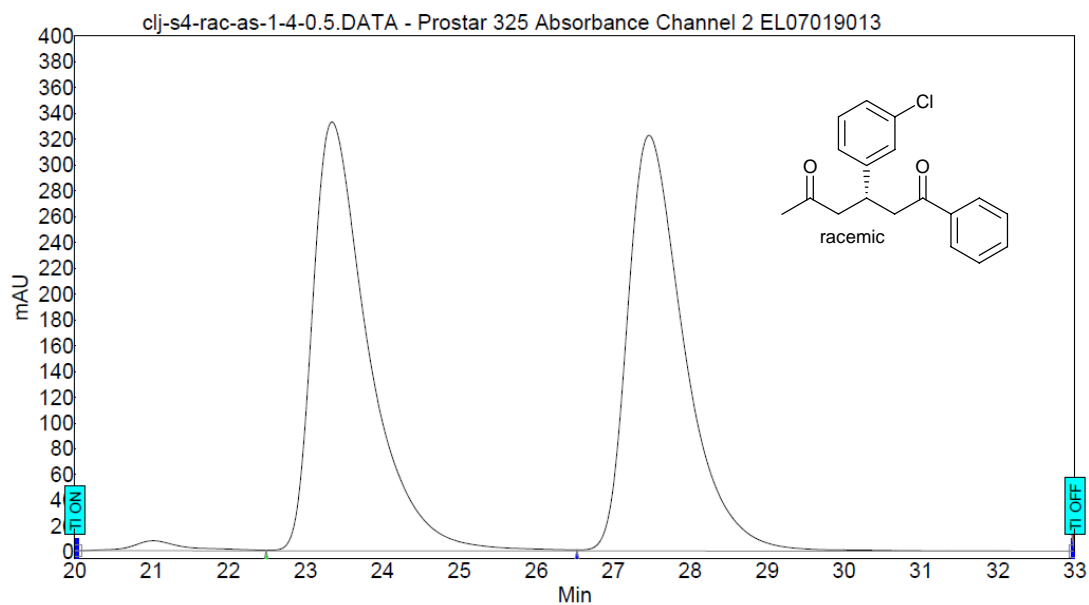

Peak results :

| Index | Name    | Time [Min] | Quantity [% Area] | Height [mAU] | Area [mAU.Min] | Area % [%] |
|-------|---------|------------|-------------------|--------------|----------------|------------|
| 1     | UNKNOWN | 23.34      | 50.32             | 332.4        | 278.0          | 50.323     |
| 2     | UNKNOWN | 27.46      | 49.68             | 322.2        | 274.4          | 49.677     |
| Total |         |            | 100.00            | 654.5        | 552.4          | 100.000    |

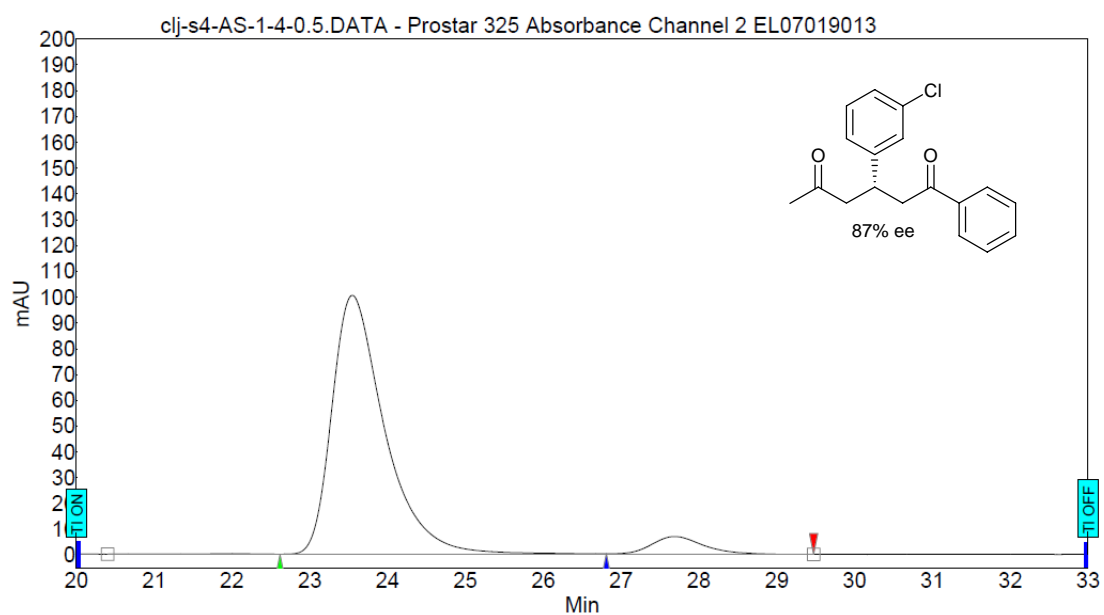

Peak results :

| Index | Name    | Time [Min] | Quantity [% Area] | Height [mAU] | Area [mAU.Min] | Area % [%] |
|-------|---------|------------|-------------------|--------------|----------------|------------|
| 1     | UNKNOWN | 23.54      | 93.57             | 100.3        | 78.8           | 93.572     |
| 2     | UNKNOWN | 27.69      | 6.43              | 6.9          | 5.4            | 6.428      |
| Total |         |            | 100.00            | 107.3        | 84.2           | 100.000    |

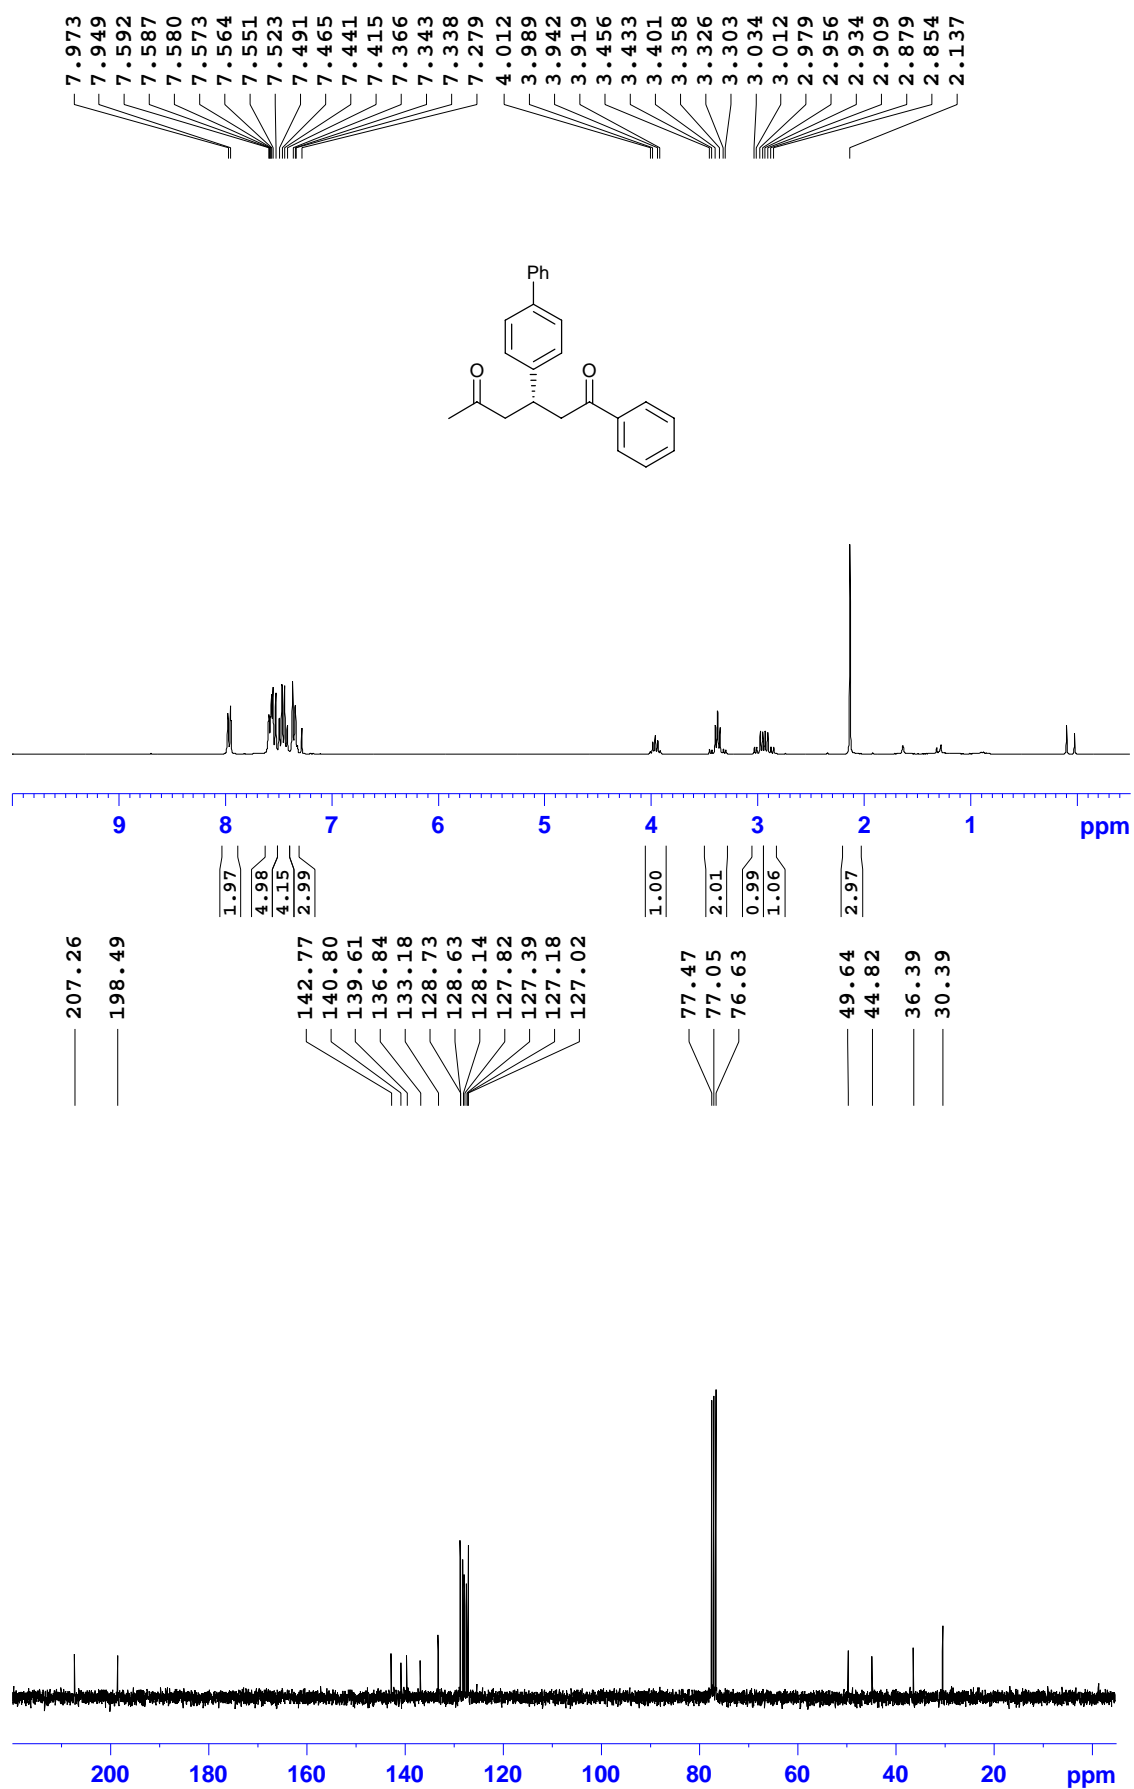

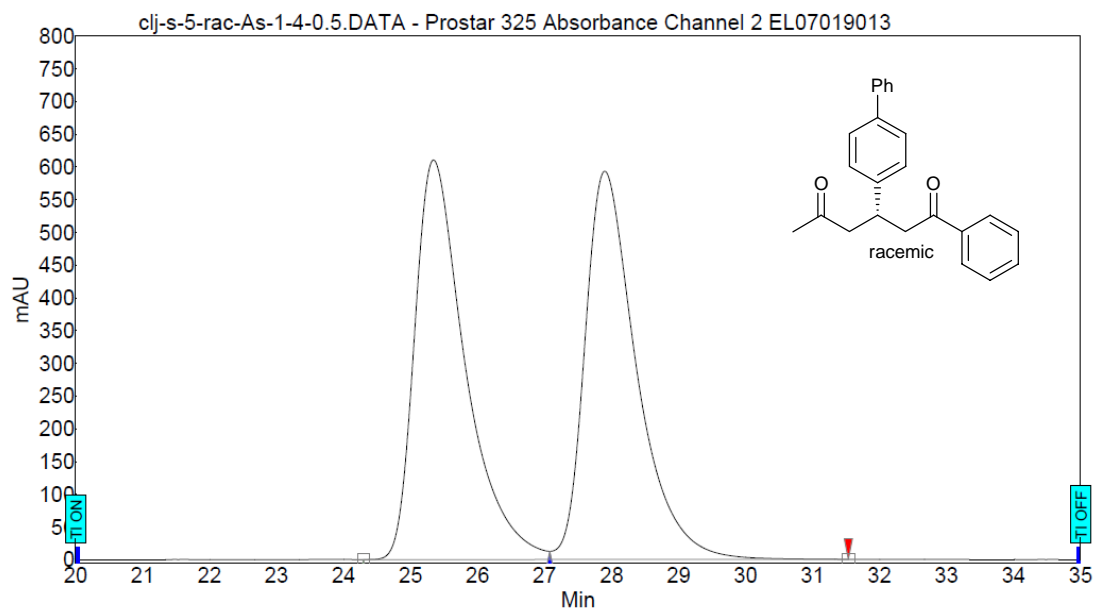

Peak results :

| Index | Name    | Time [Min] | Quantity [% Area] | Height [mAU] | Area [mAU.Min] | Area % [%] |
|-------|---------|------------|-------------------|--------------|----------------|------------|
| 1     | UNKNOWN | 25.34      | 50.16             | 610.3        | 532.5          | 50.157     |
| 2     | UNKNOWN | 27.90      | 49.84             | 593.1        | 529.2          | 49.843     |
| Total |         |            | 100.00            | 1203.3       | 1061.7         | 100.000    |

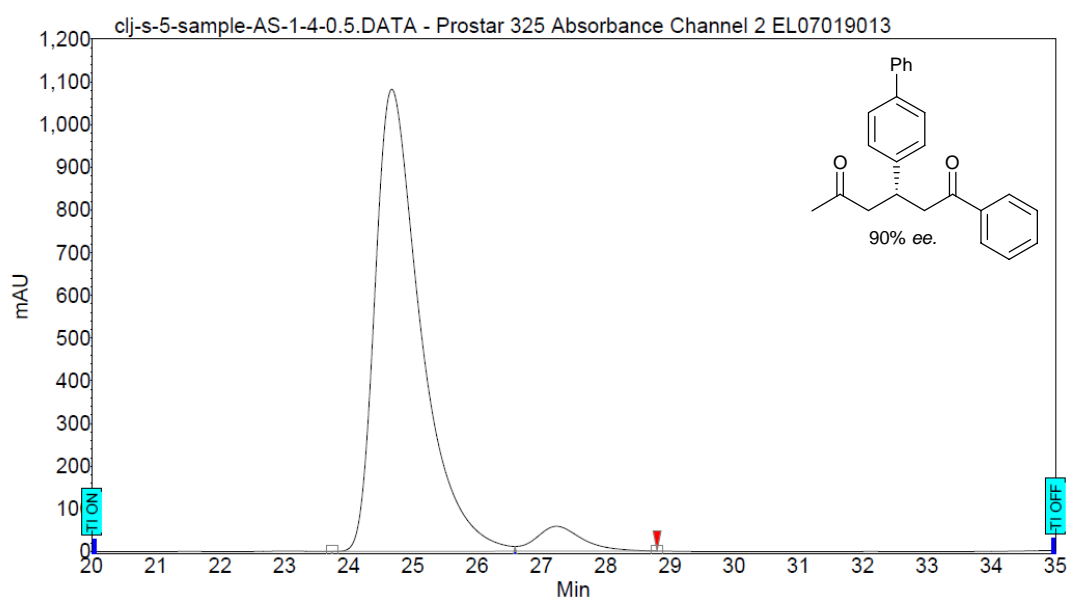

Peak results :

| Index | Name    | Time [Min] | Quantity [% Area] | Height [mAU] | Area [mAU.Min] | Area % [%] |
|-------|---------|------------|-------------------|--------------|----------------|------------|
| 1     | UNKNOWN | 24.67      | 94.83             | 1082.0       | 888.1          | 94.835     |
| 2     | UNKNOWN | 27.23      | 5.17              | 58.3         | 48.4           | 5.165      |
| Total |         |            | 100.00            | 1140.4       | 936.4          | 100.000    |

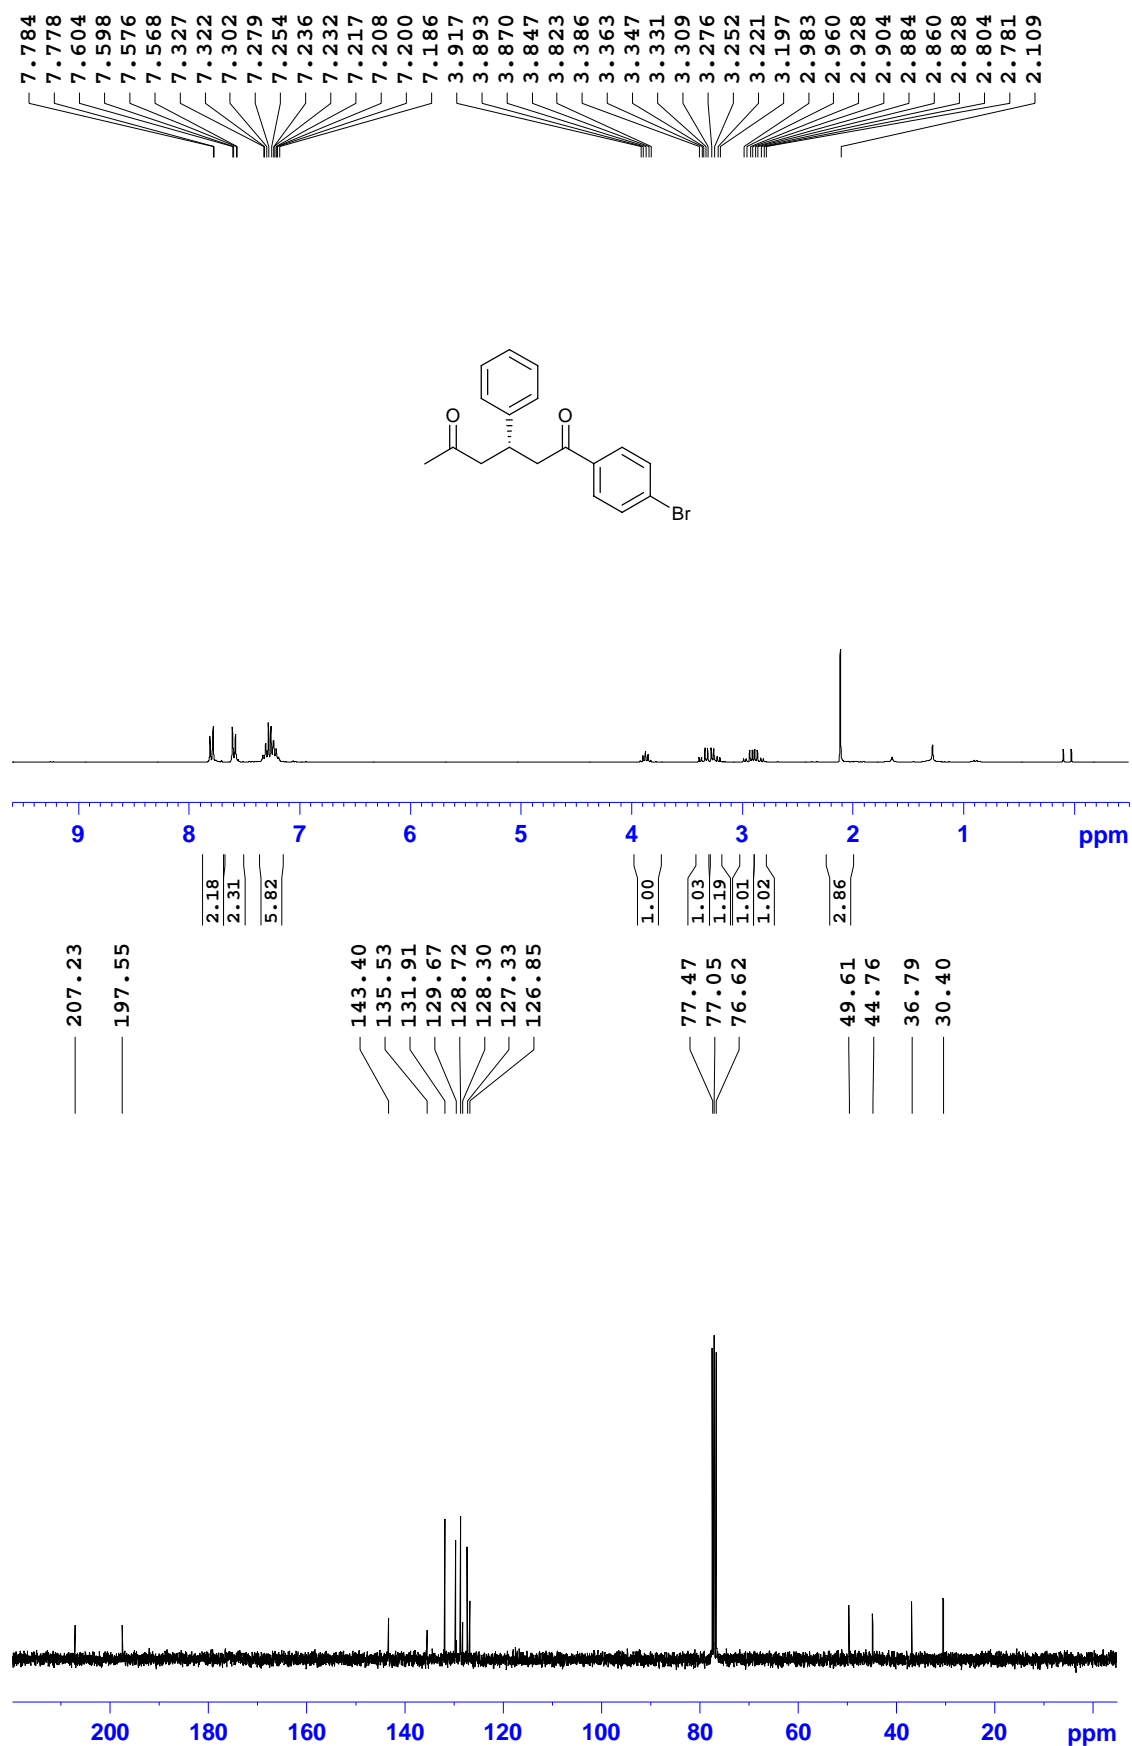

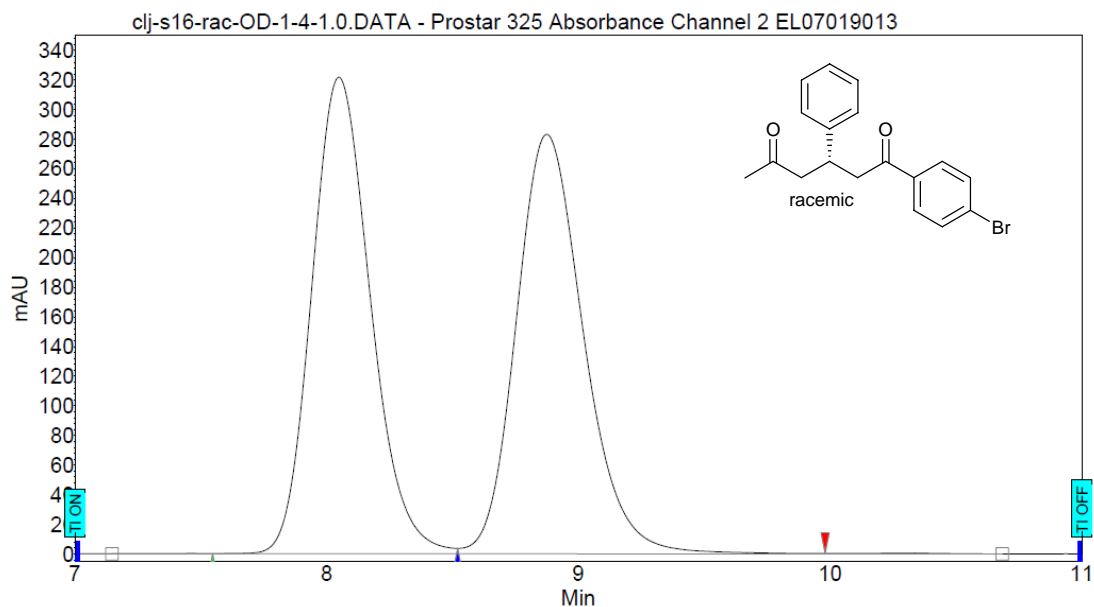

Peak results :

| Index | Name    | Time [Min] | Quantity [% Area] | Height [mAU] | Area [mAU.Min] | Area % [%] |
|-------|---------|------------|-------------------|--------------|----------------|------------|
| 1     | UNKNOWN | 8.05       | 49.76             | 321.8        | 86.9           | 49.762     |
| 2     | UNKNOWN | 8.87       | 50.24             | 283.2        | 87.8           | 50.238     |
| Total |         |            | 100.00            | 605.0        | 174.7          | 100.000    |

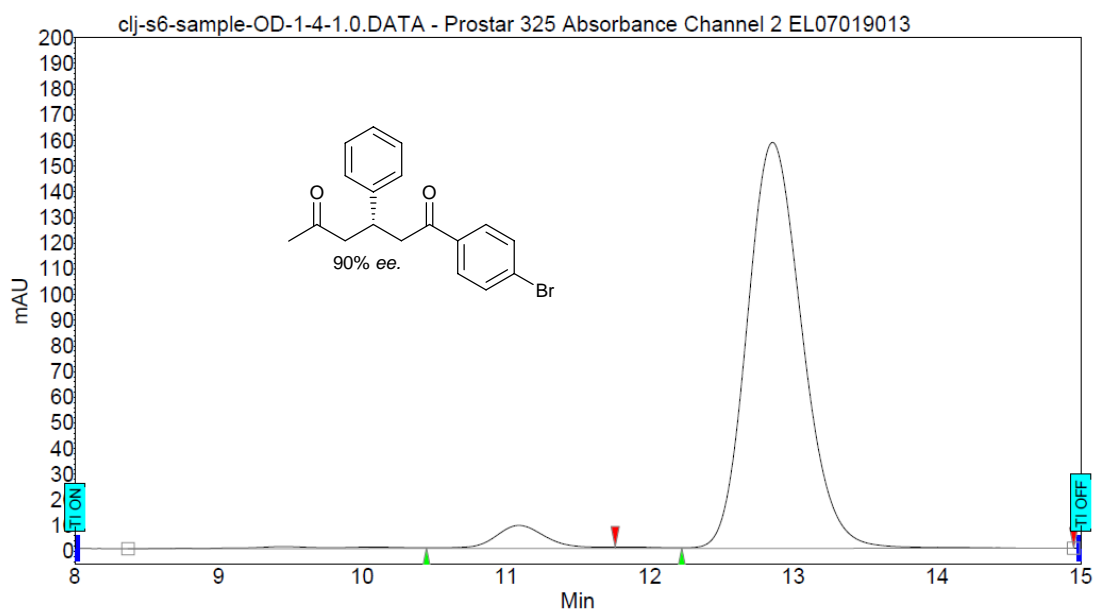

Peak results :

| Index | Name    | Time [Min] | Quantity [% Area] | Height [mAU] | Area [mAU.Min] | Area % [%] |
|-------|---------|------------|-------------------|--------------|----------------|------------|
| 1     | UNKNOWN | 11.09      | 5.07              | 9.0          | 3.7            | 5.066      |
| 2     | UNKNOWN | 12.85      | 94.93             | 158.1        | 69.9           | 94.934     |
| Total |         |            | 100.00            | 167.1        | 73.6           | 100.000    |

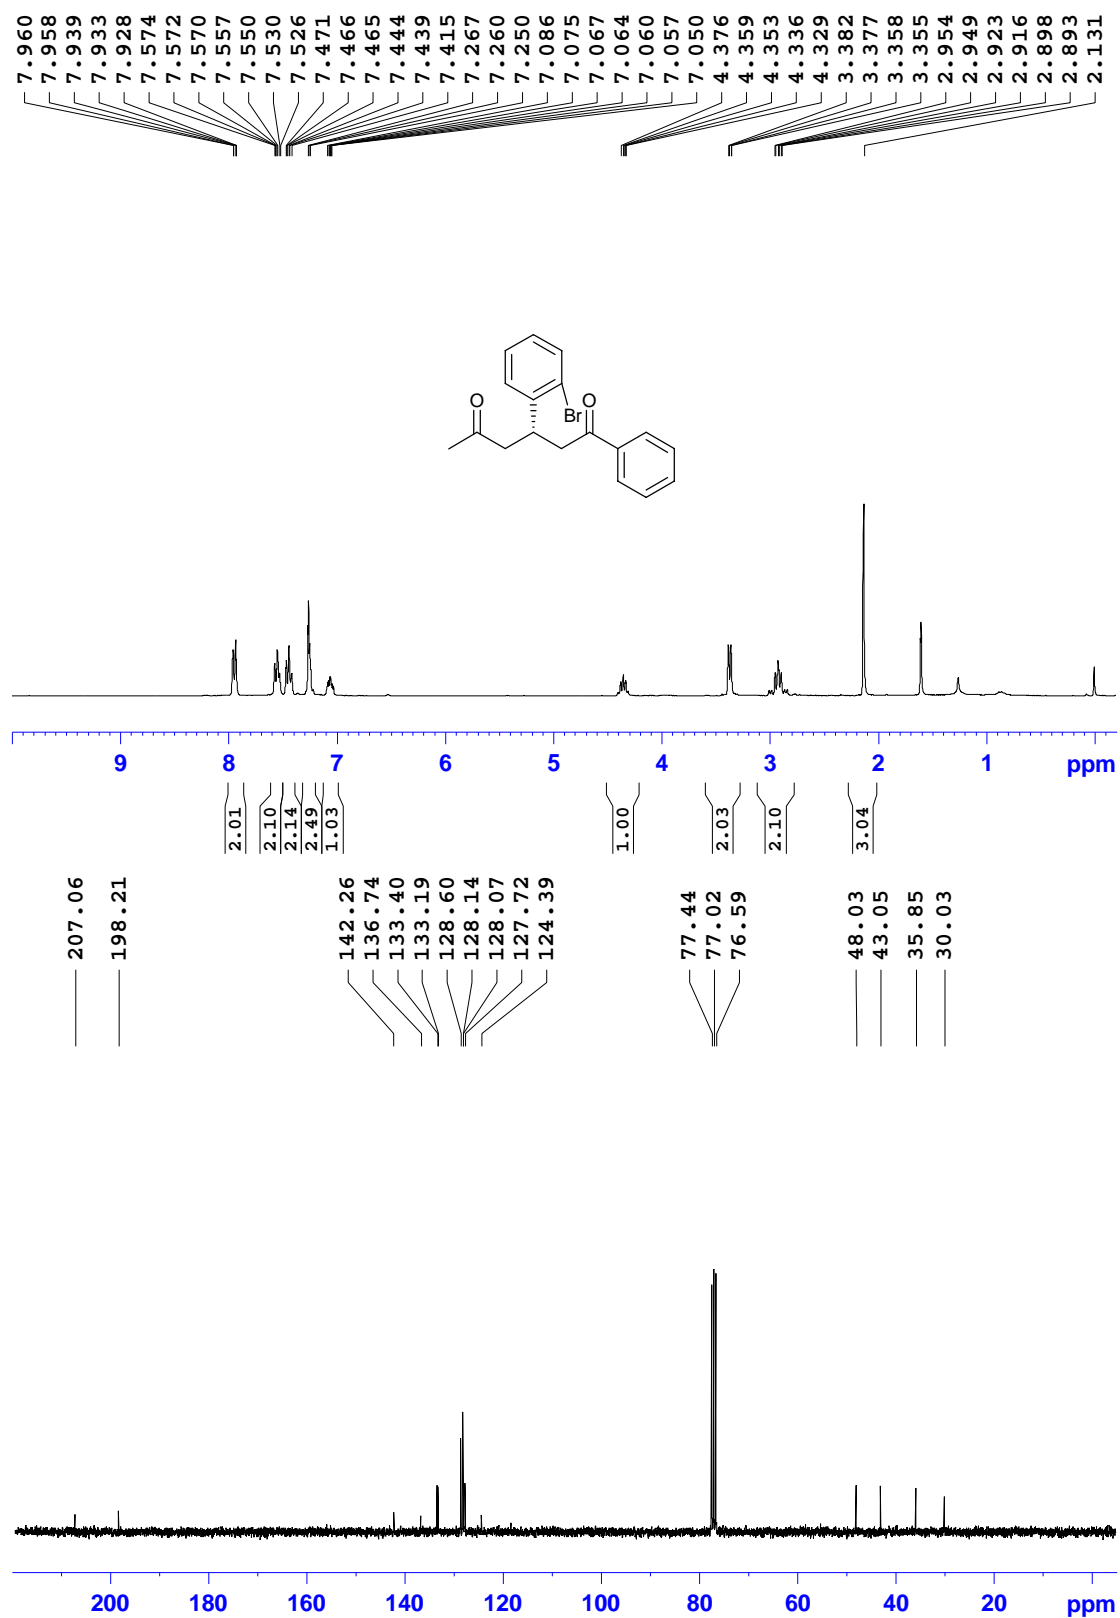



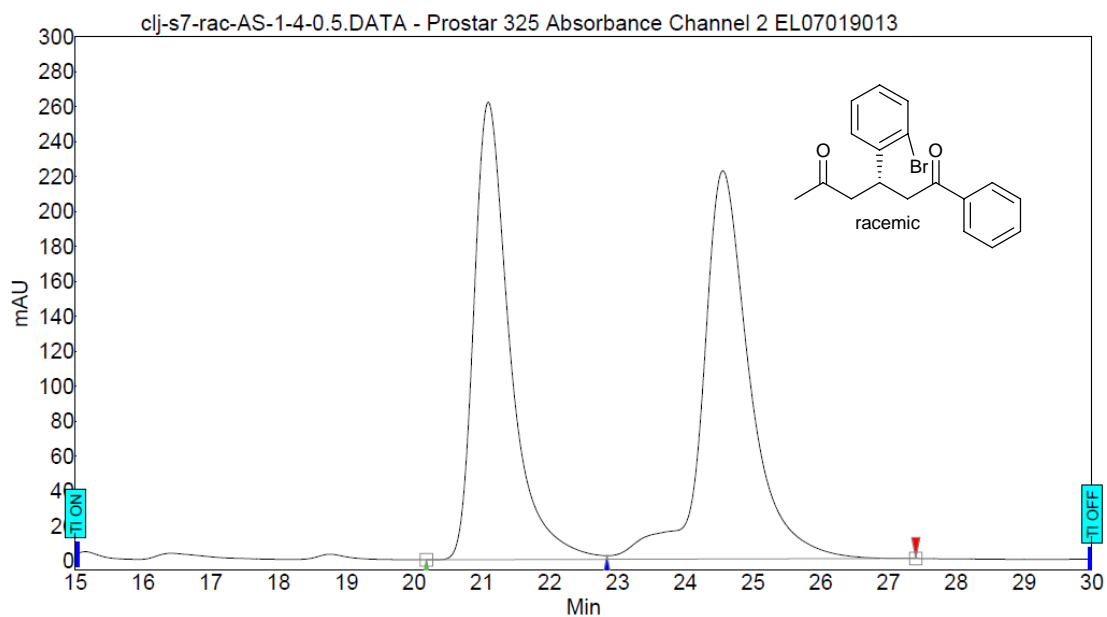

Peak results :

| Index | Name    | Time [Min] | Quantity [% Area] | Height [mAU] | Area [mAU.Min] | Area % [%] |
|-------|---------|------------|-------------------|--------------|----------------|------------|
| 1     | UNKNOWN | 21.09      | 47.34             | 261.8        | 161.0          | 47.345     |
| 2     | UNKNOWN | 24.55      | 52.66             | 222.1        | 179.1          | 52.655     |
| Total |         |            | 100.00            | 483.9        | 340.1          | 100.000    |

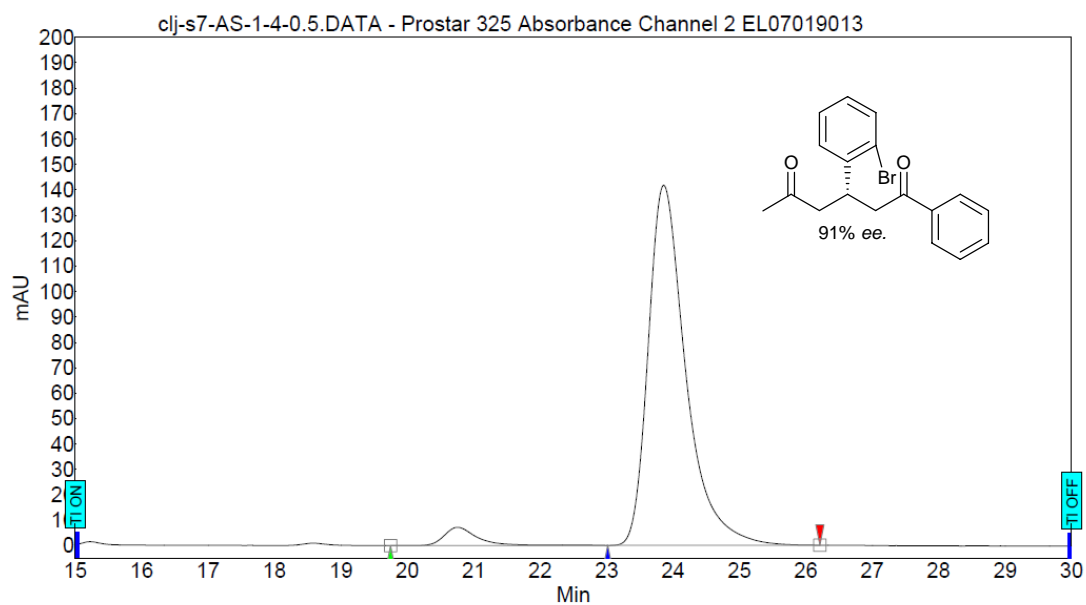

Peak results :

| Index | Name    | Time [Min] | Quantity [% Area] | Height [mAU] | Area [mAU.Min] | Area % [%] |
|-------|---------|------------|-------------------|--------------|----------------|------------|
| 1     | UNKNOWN | 20.76      | 4.38              | 7.2          | 4.3            | 4.384      |
| 2     | UNKNOWN | 23.86      | 95.62             | 141.7        | 92.8           | 95.616     |
| Total |         |            | 100.00            | 148.9        | 97.1           | 100.000    |

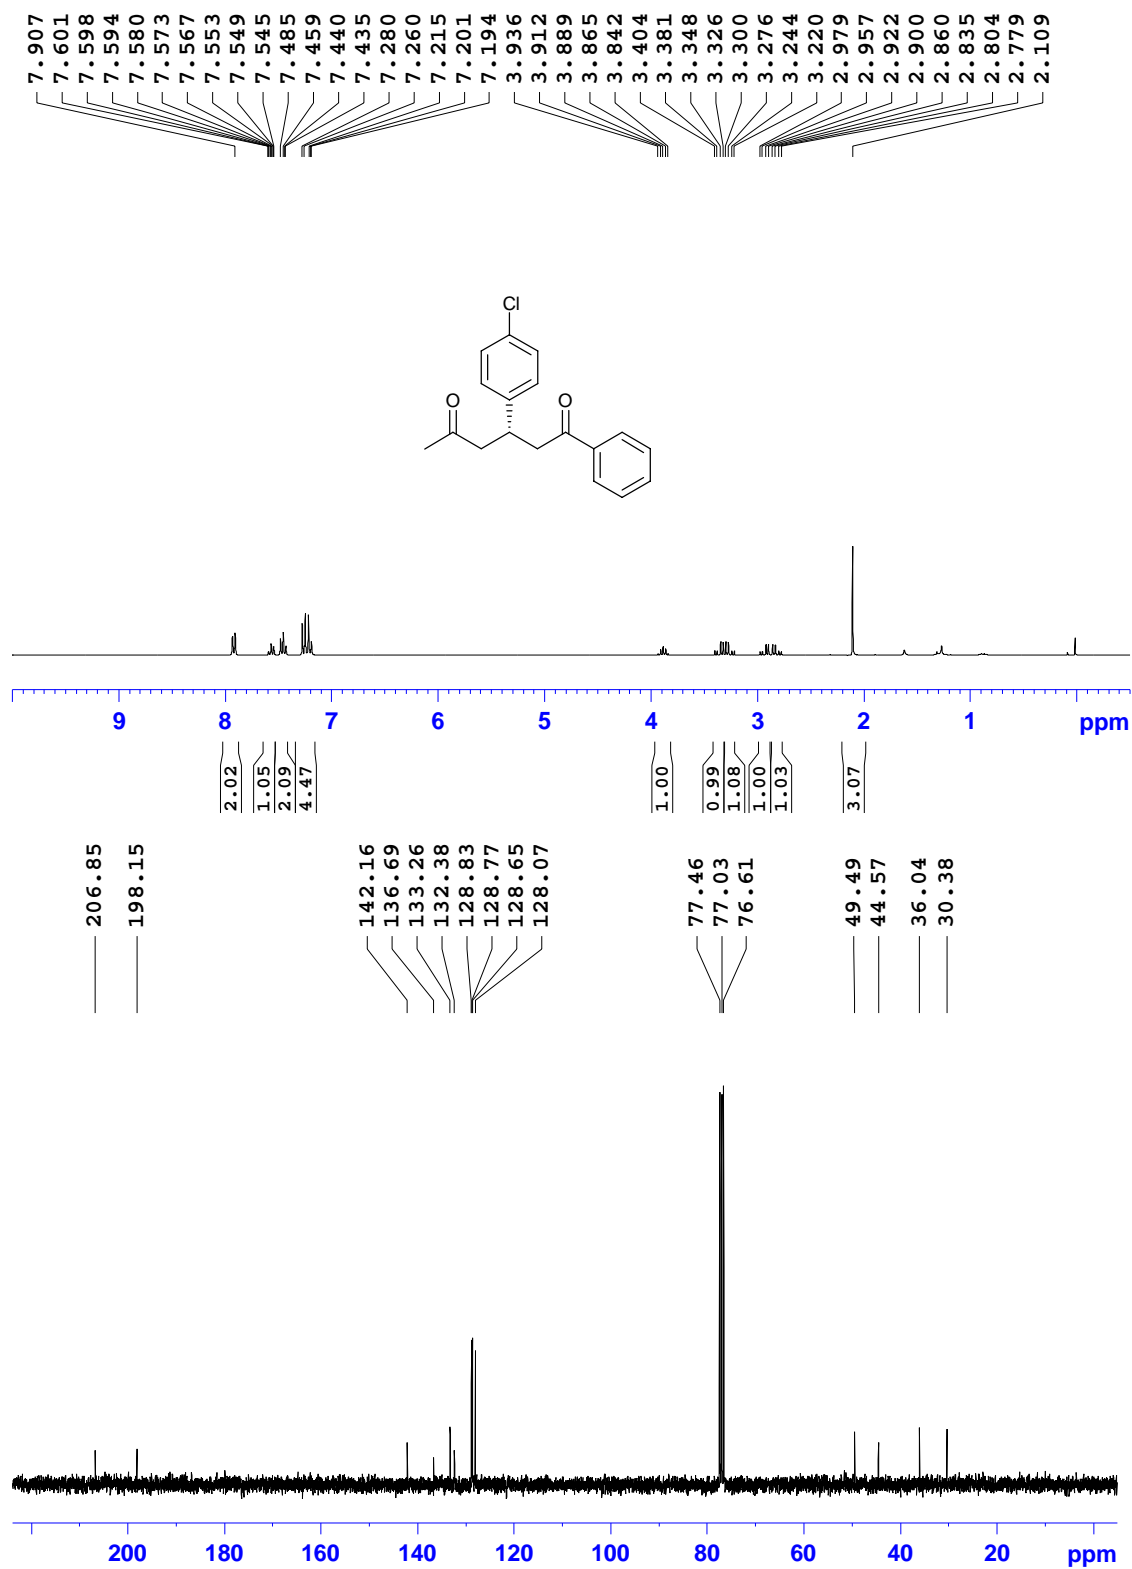

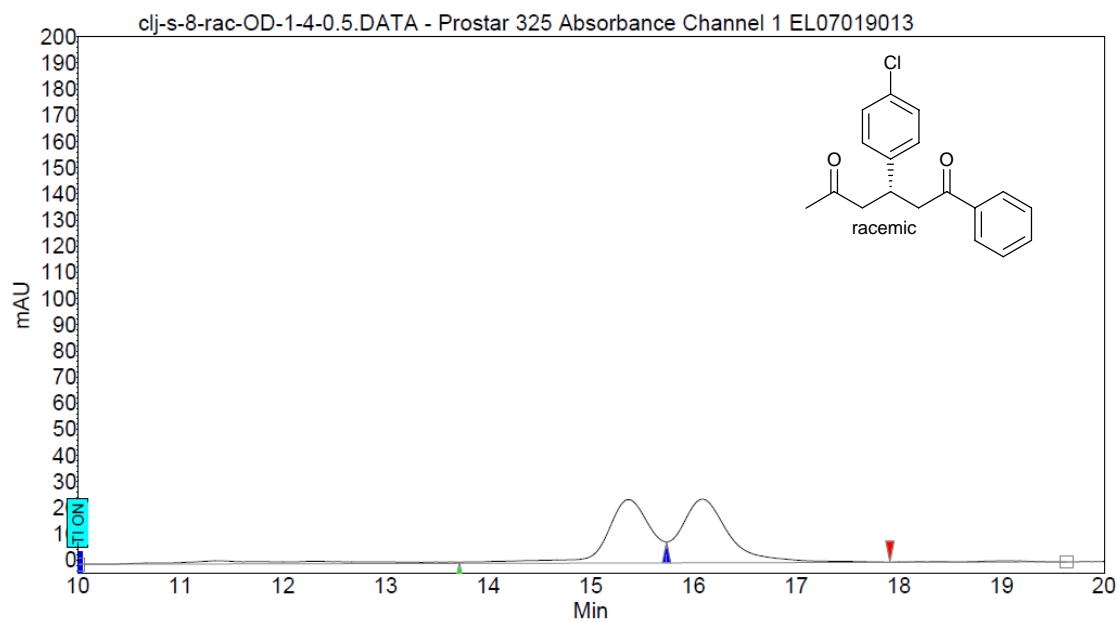

Peak results :

| Index | Name    | Time [Min] | Quantity [% Area] | Height [mAU] | Area [mAU.Min] | Area % [%] |
|-------|---------|------------|-------------------|--------------|----------------|------------|
| 1     | UNKNOWN | 15.37      | 47.99             | 24.3         | 12.1           | 47.991     |
| 2     | UNKNOWN | 16.08      | 52.01             | 24.3         | 13.1           | 52.009     |
| Total |         |            | 100.00            | 48.6         | 25.2           | 100.000    |

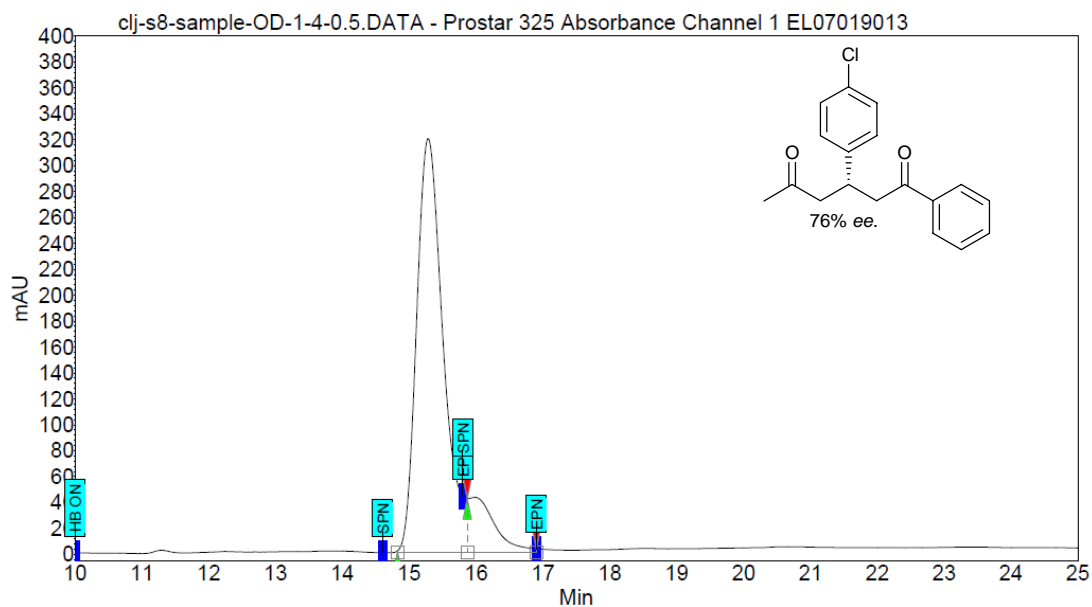

Peak results :

| Index | Name    | Time [Min] | Quantity [% Area] | Height [mAU] | Area [mAU.Min] | Area % [%] |
|-------|---------|------------|-------------------|--------------|----------------|------------|
| 1     | UNKNOWN | 15.28      | 87.96             | 319.7        | 146.9          | 87.963     |
| 2     | UNKNOWN | 15.98      | 12.04             | 42.7         | 20.1           | 12.037     |
| Total |         |            | 100.00            | 362.4        | 166.9          | 100.000    |

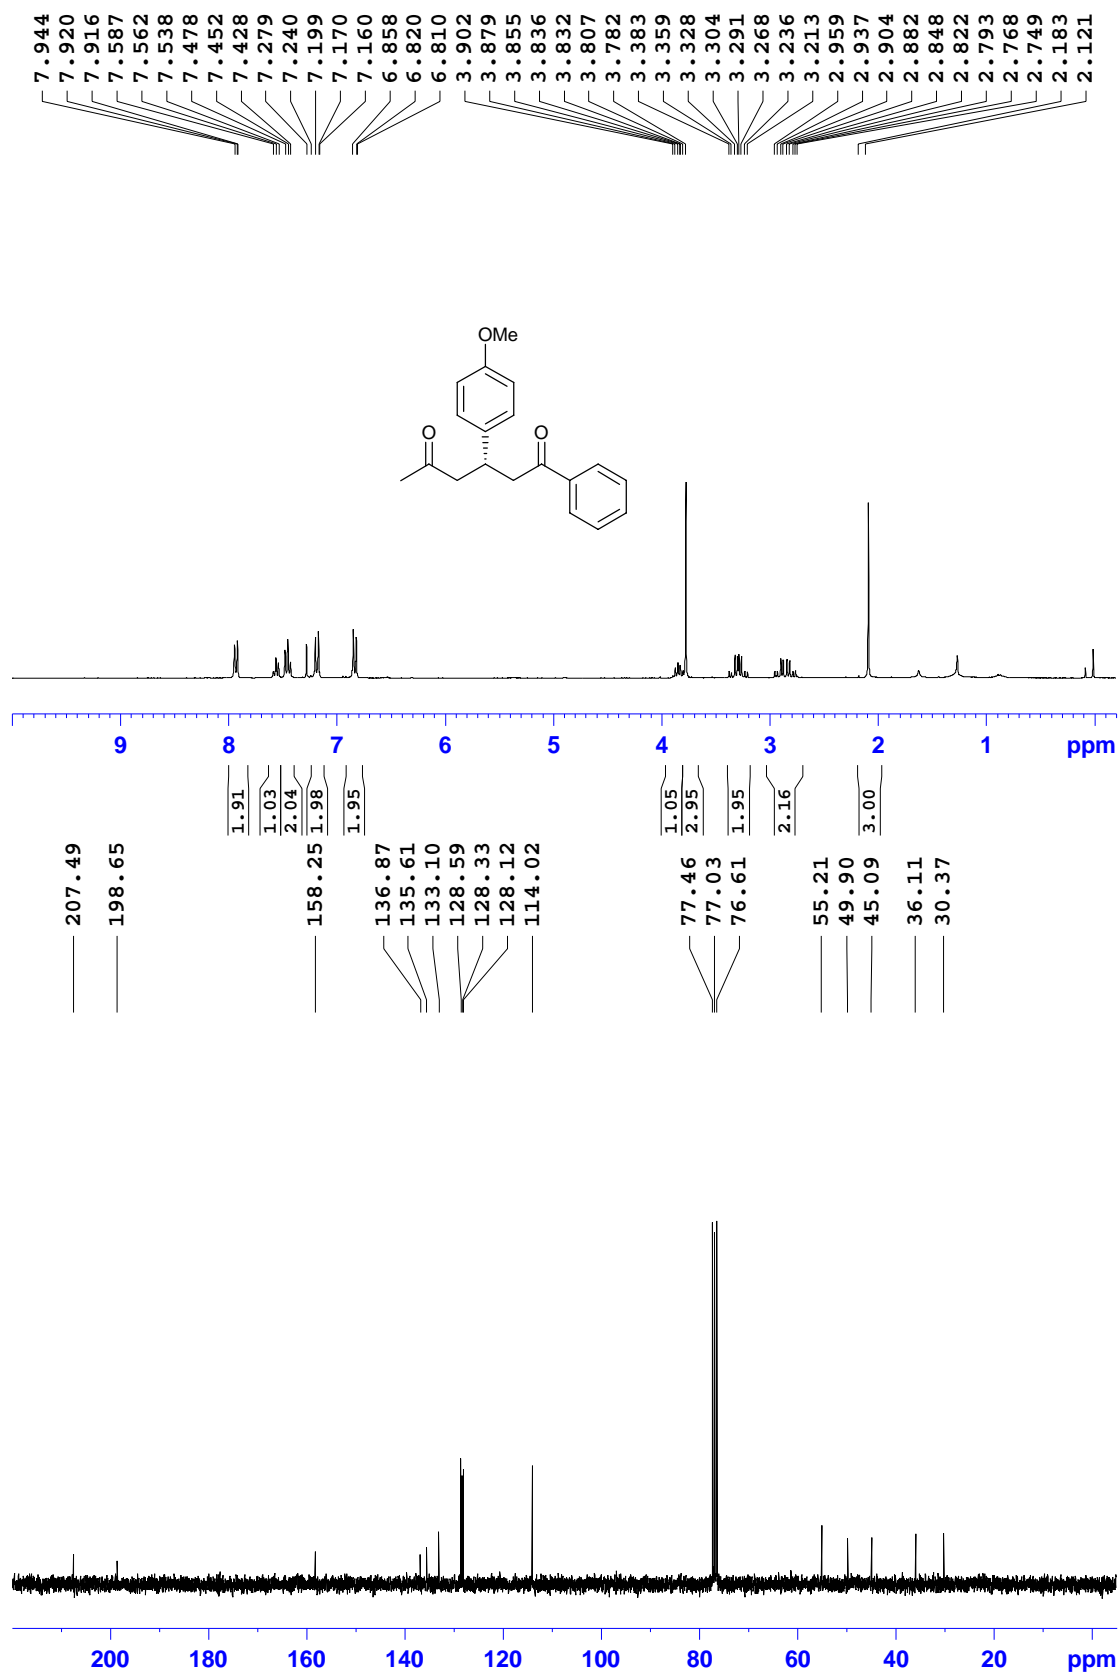

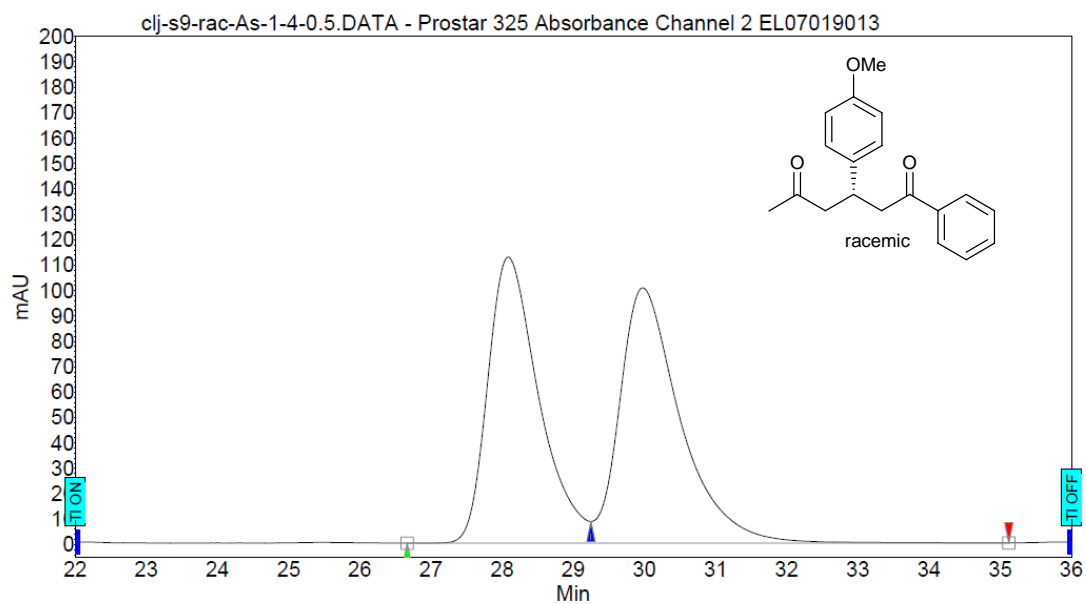

Peak results :

| Index | Name    | Time [Min] | Quantity [% Area] | Height [mAU] | Area [mAU.Min] | Area % [%] |
|-------|---------|------------|-------------------|--------------|----------------|------------|
| 1     | UNKNOWN | 28.08      | 48.50             | 112.6        | 93.4           | 48.500     |
| 2     | UNKNOWN | 29.97      | 51.50             | 100.5        | 99.1           | 51.500     |
| Total |         |            | 100.00            | 213.1        | 192.5          | 100.000    |

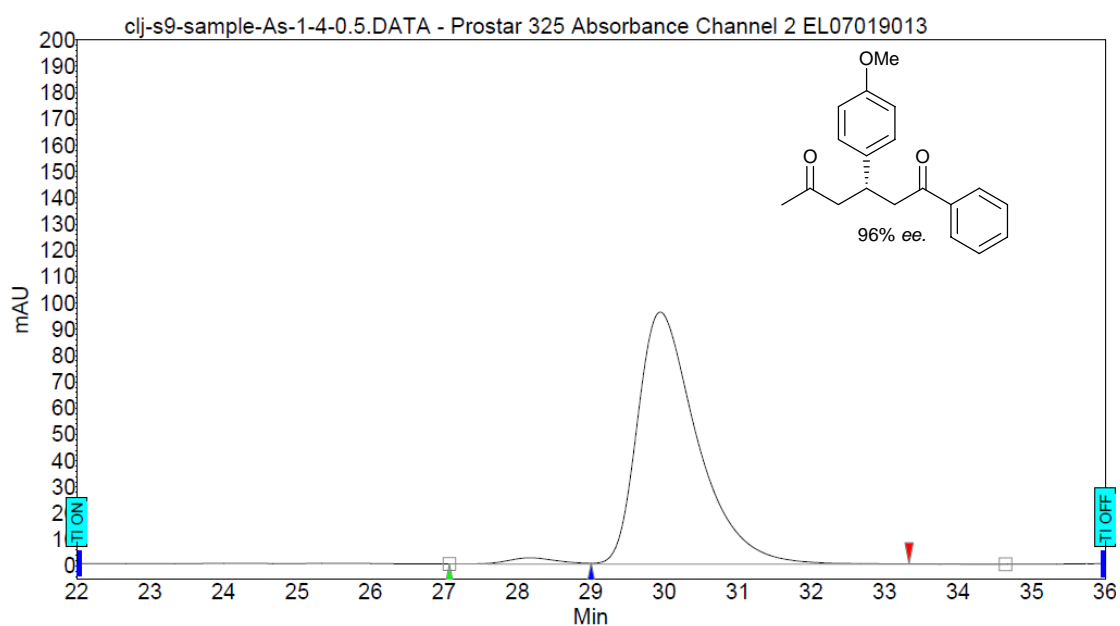

Peak results :

| Index | Name    | Time [Min] | Quantity [% Area] | Height [mAU] | Area [mAU.Min] | Area % [%] |
|-------|---------|------------|-------------------|--------------|----------------|------------|
| 1     | UNKNOWN | 28.15      | 2.00              | 2.4          | 1.8            | 2.005      |
| 2     | UNKNOWN | 29.94      | 98.00             | 95.9         | 90.2           | 97.995     |
| Total |         |            | 100.00            | 98.2         | 92.1           | 100.000    |

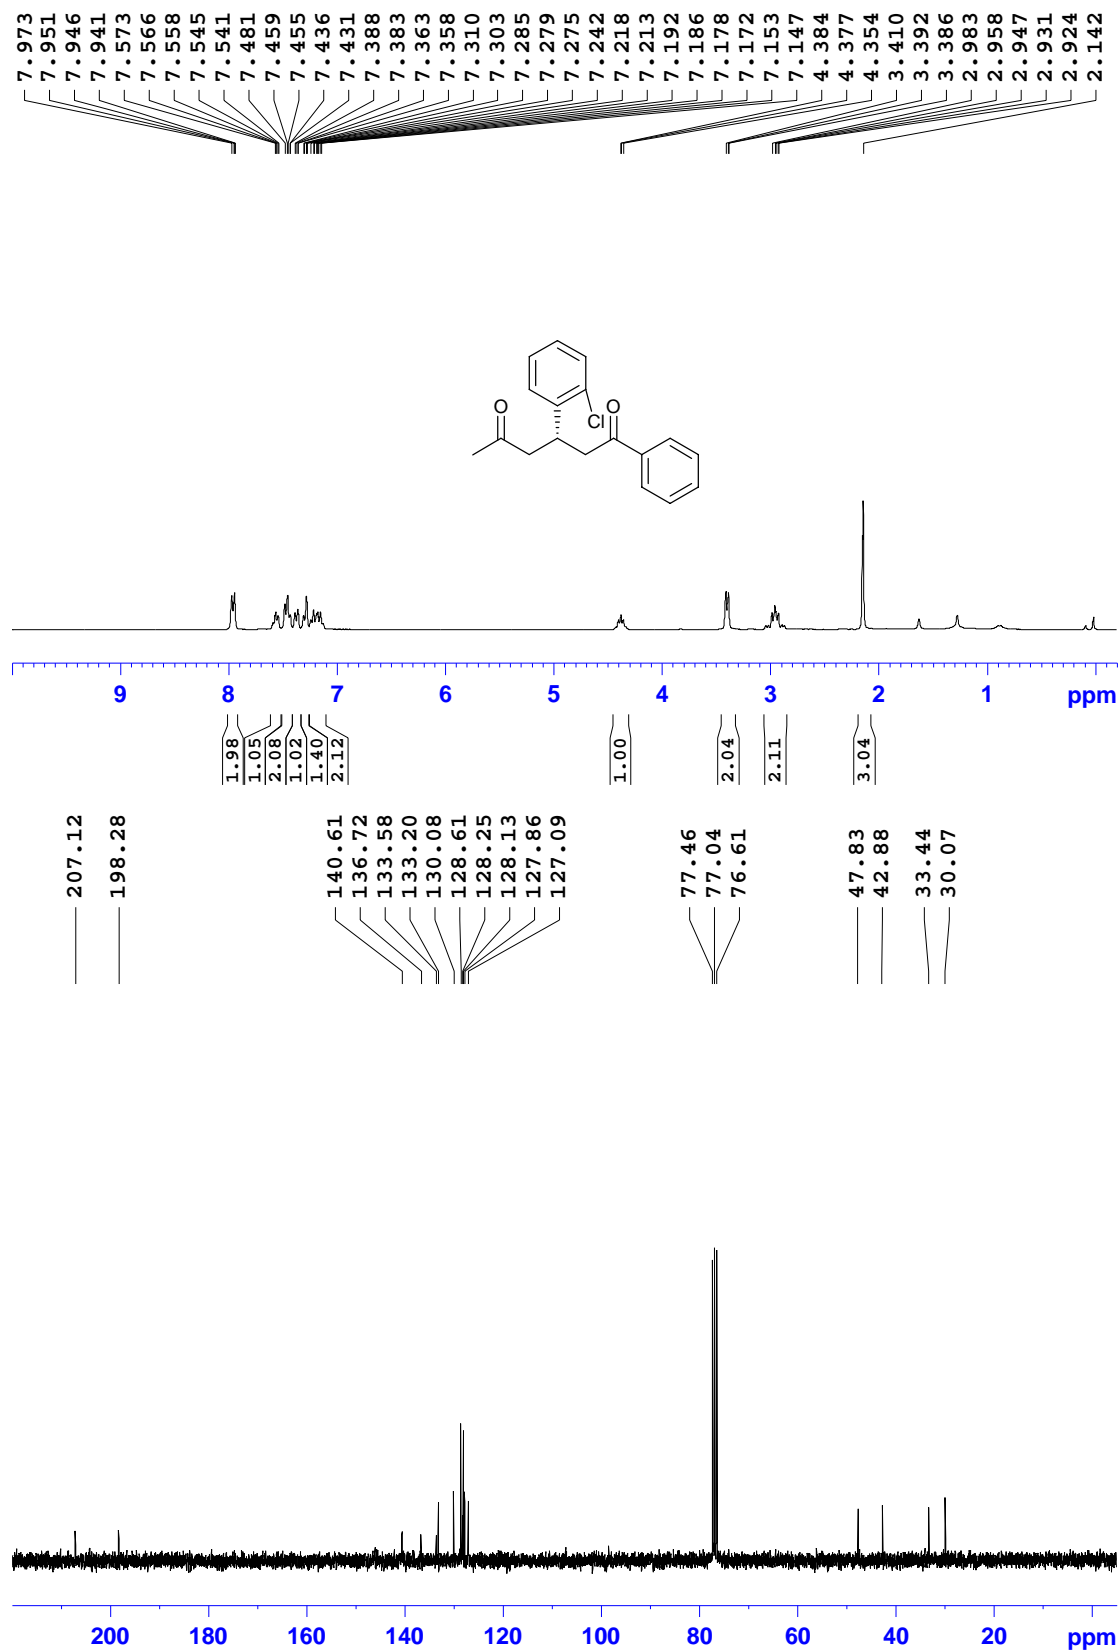

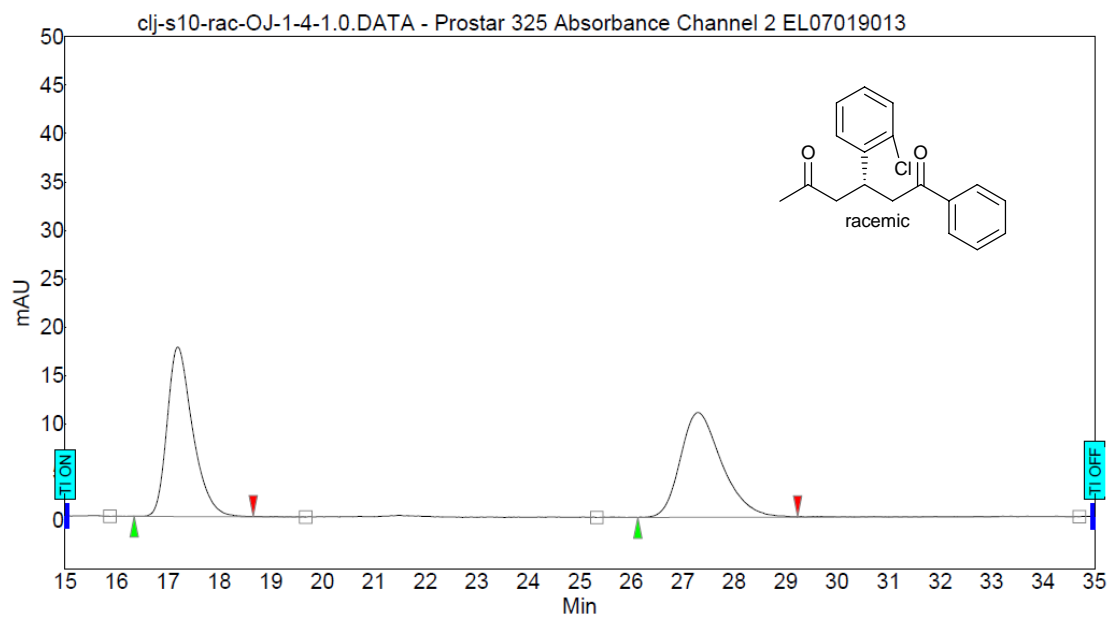

Peak results :

| Index | Name    | Time [Min] | Quantity [% Area] | Height [mAU] | Area [mAU.Min] | Area % [%] |
|-------|---------|------------|-------------------|--------------|----------------|------------|
| 1     | UNKNOWN | 17.19      | 49.92             | 17.5         | 10.1           | 49.918     |
| 2     | UNKNOWN | 27.29      | 50.08             | 10.8         | 10.1           | 50.082     |
| Total |         |            | 100.00            | 28.3         | 20.3           | 100.000    |

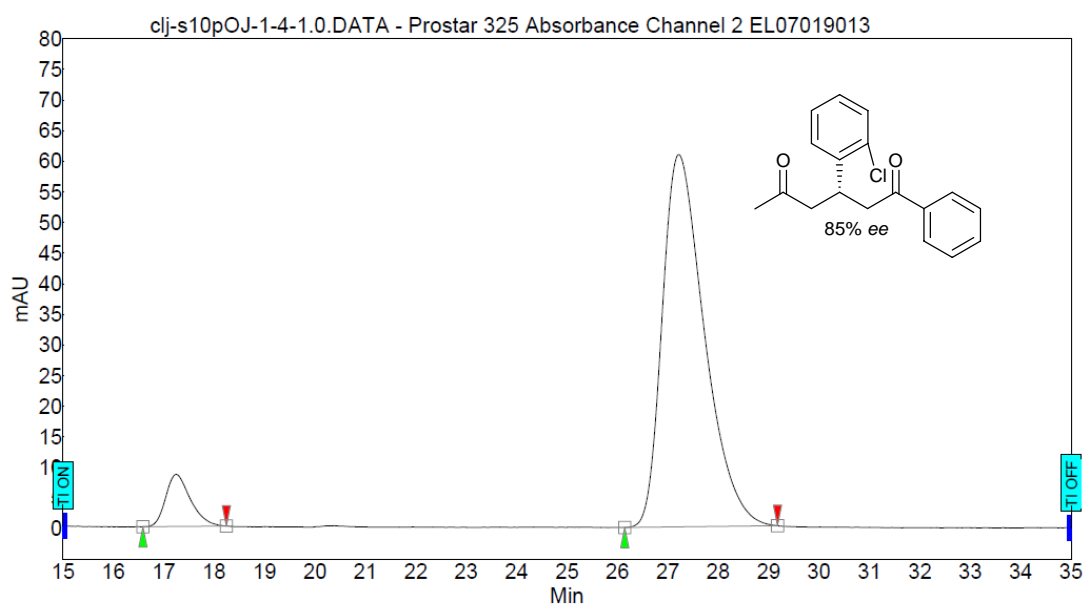

Peak results :

| Index | Name    | Time [Min] | Quantity [% Area] | Height [mAU] | Area [mAU.Min] | Area % [%] |
|-------|---------|------------|-------------------|--------------|----------------|------------|
| 1     | UNKNOWN | 17.25      | 7.58              | 8.5          | 4.8            | 7.578      |
| 2     | UNKNOWN | 27.21      | 92.42             | 60.8         | 58.8           | 92.422     |
| Total |         |            | 100.00            | 69.3         | 63.6           | 100.000    |

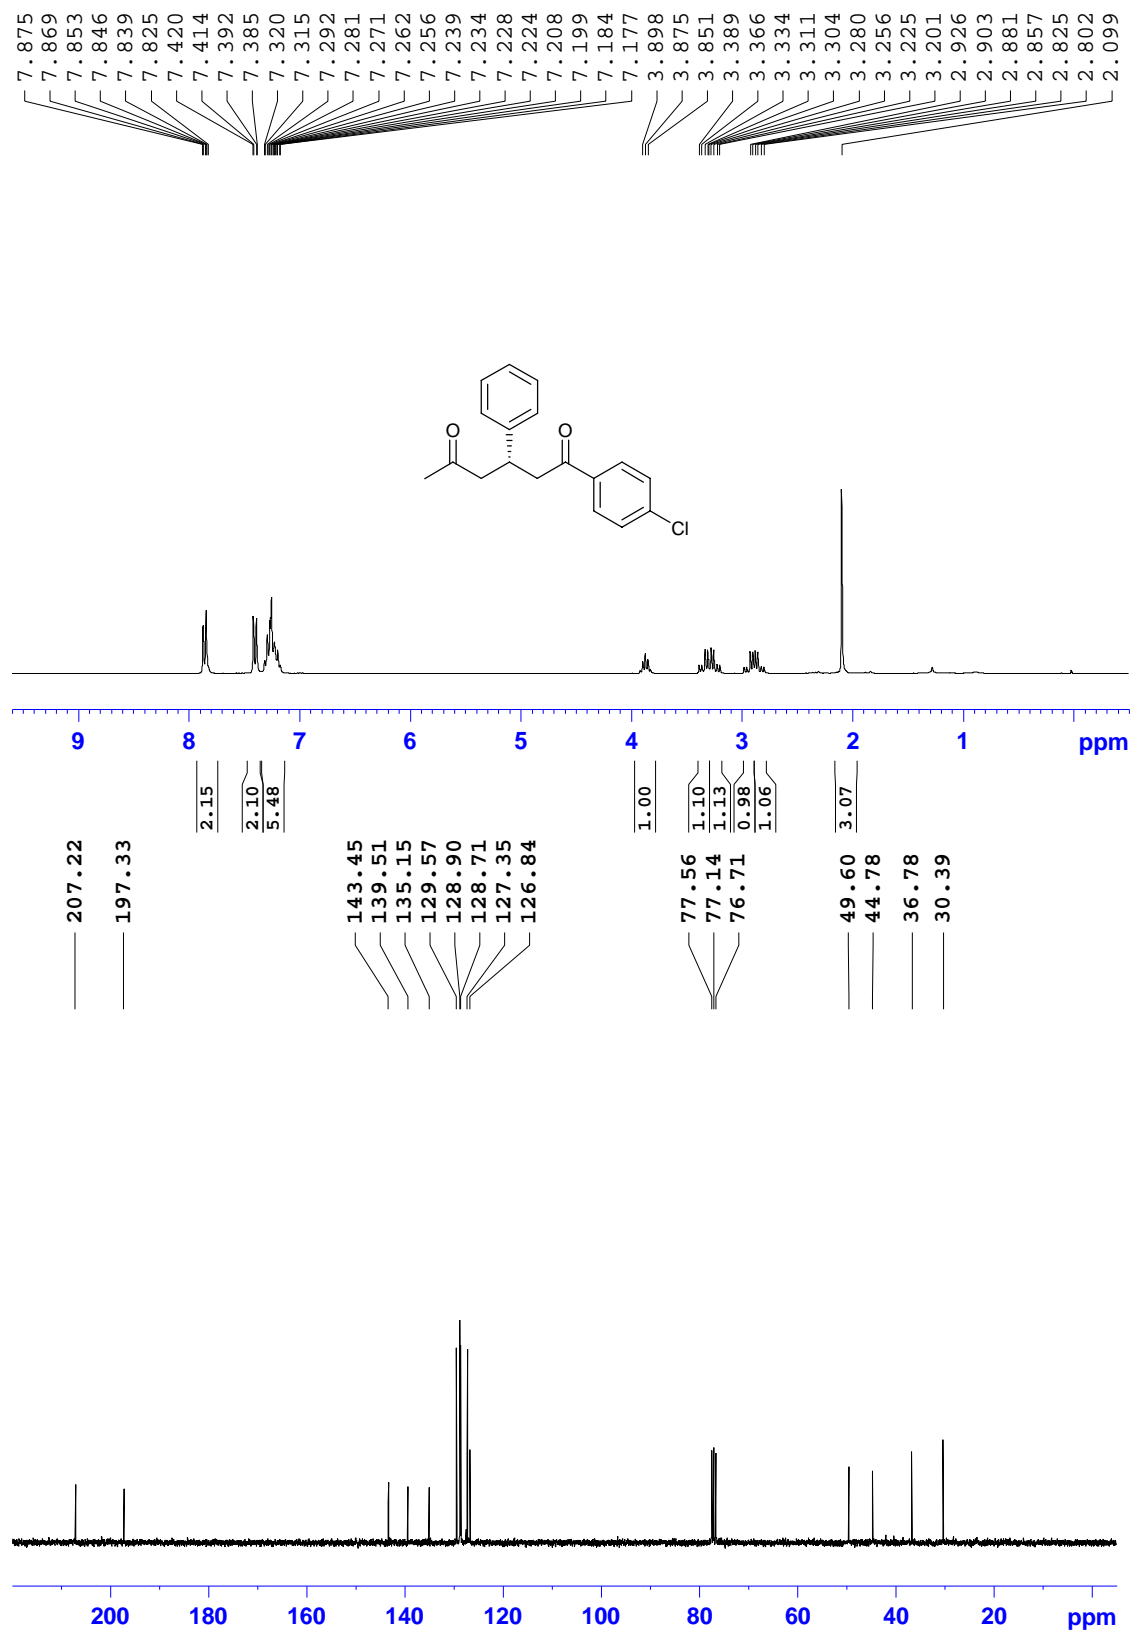



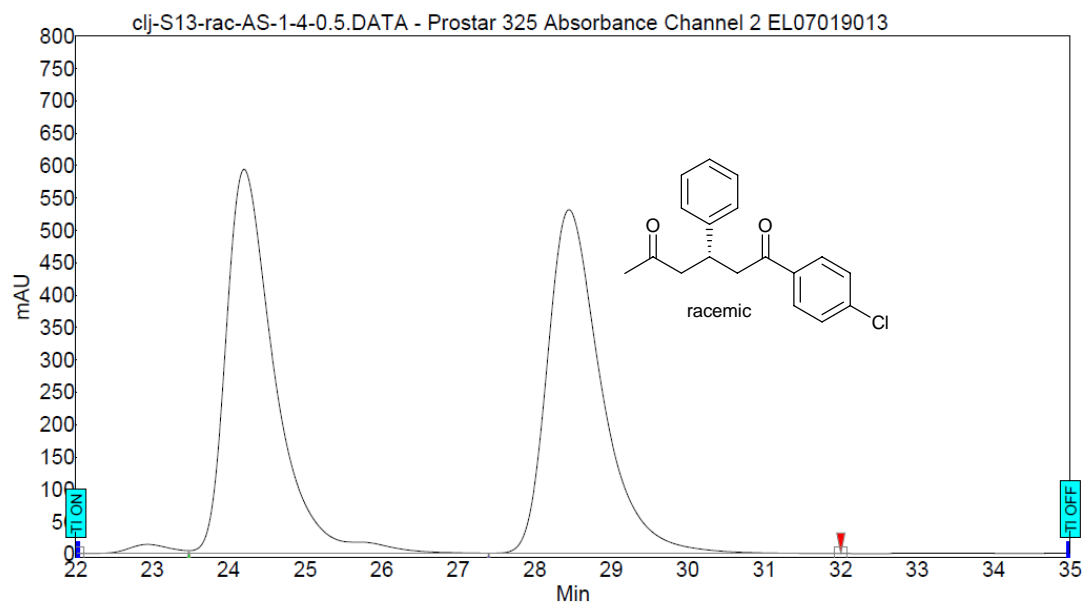

Peak results :

| Index | Name    | Time [Min] | Quantity [% Area] | Height [mAU] | Area [mAU.Min] | Area % [%] |
|-------|---------|------------|-------------------|--------------|----------------|------------|
| 1     | UNKNOWN | 24.20      | 50.18             | 593.5        | 437.9          | 50.181     |
| 2     | UNKNOWN | 28.45      | 49.82             | 531.1        | 434.7          | 49.819     |
| Total |         |            | 100.00            | 1124.6       | 872.6          | 100.000    |

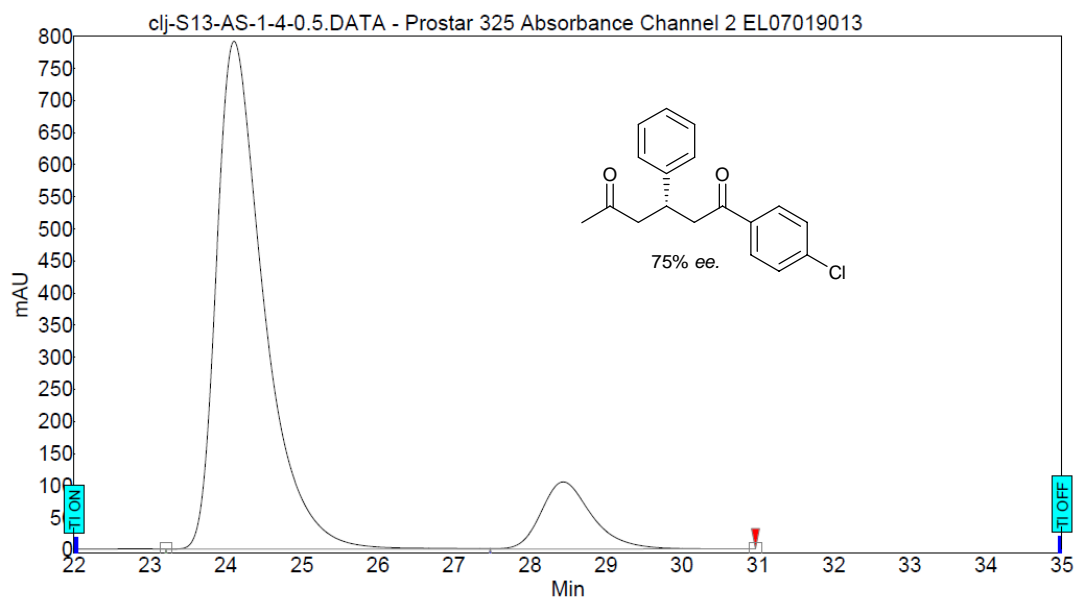

Peak results :

| Index | Name    | Time [Min] | Quantity [% Area] | Height [mAU] | Area [mAU.Min] | Area % [%] |
|-------|---------|------------|-------------------|--------------|----------------|------------|
| 1     | UNKNOWN | 24.10      | 87.57             | 791.4        | 570.3          | 87.574     |
| 2     | UNKNOWN | 28.44      | 12.43             | 104.5        | 80.9           | 12.426     |
| Total |         |            | 100.00            | 895.9        | 651.3          | 100.000    |

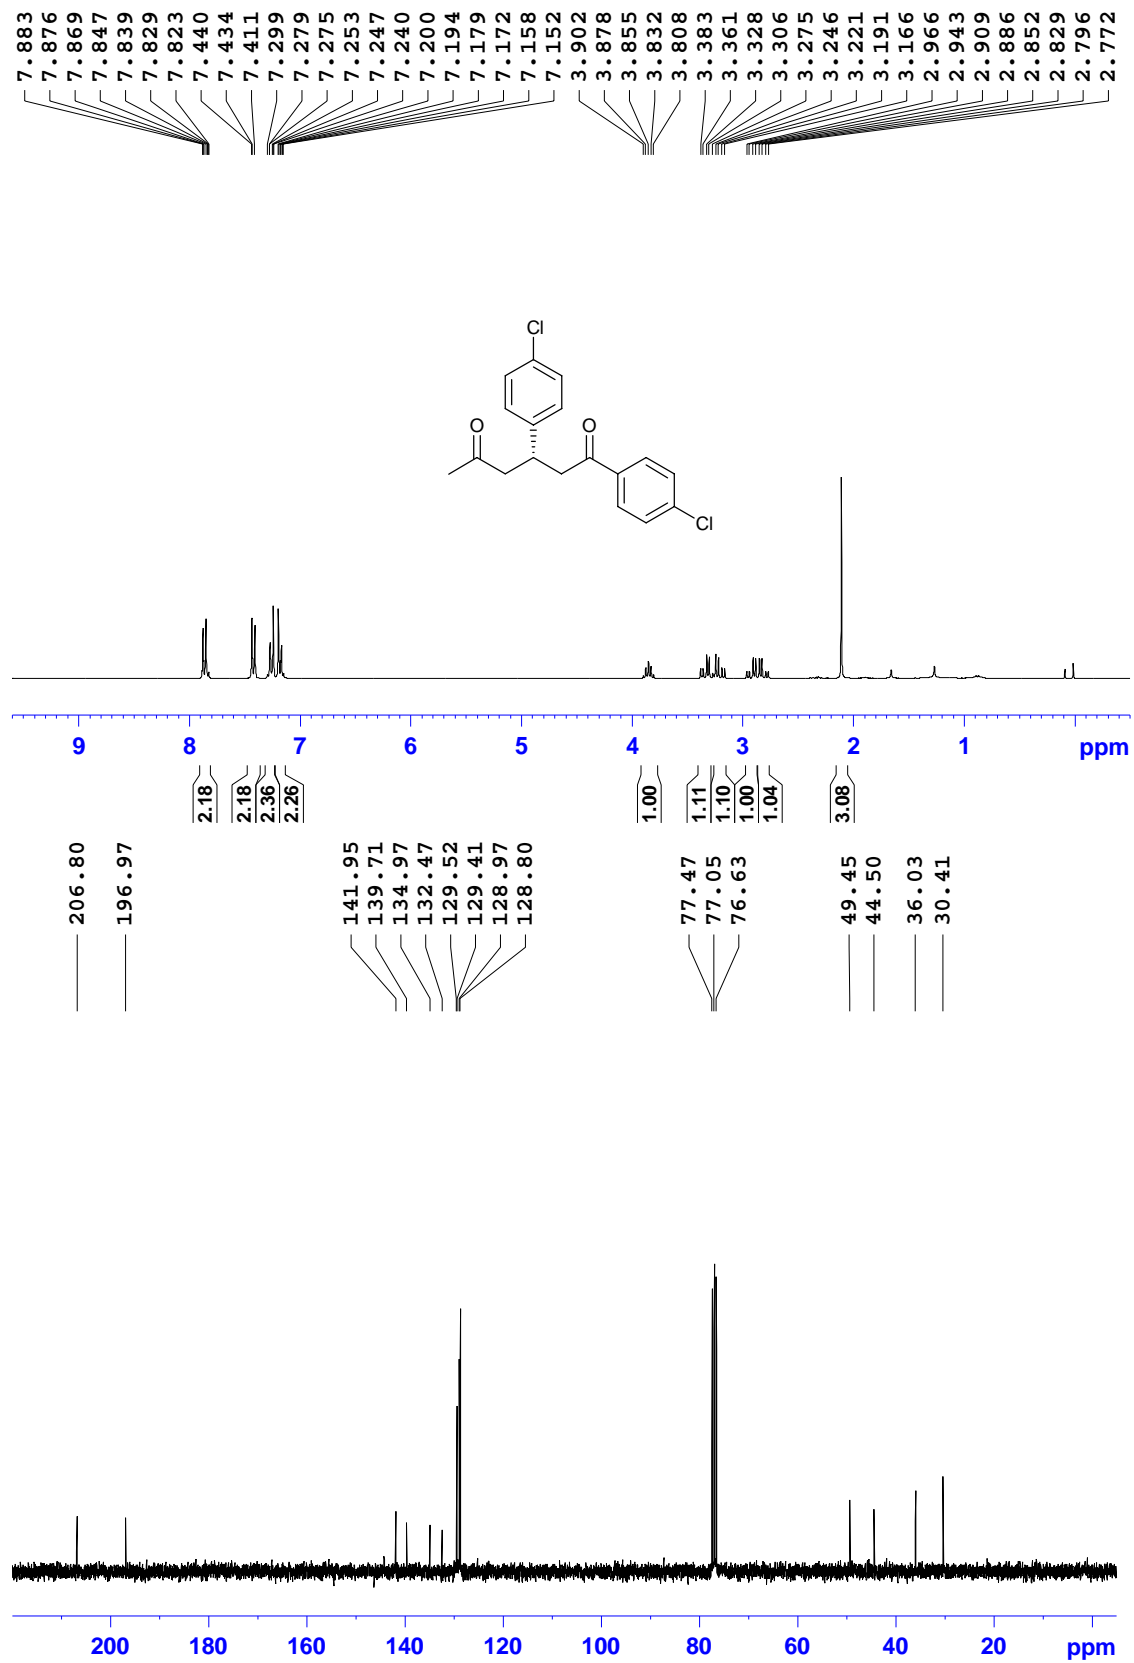

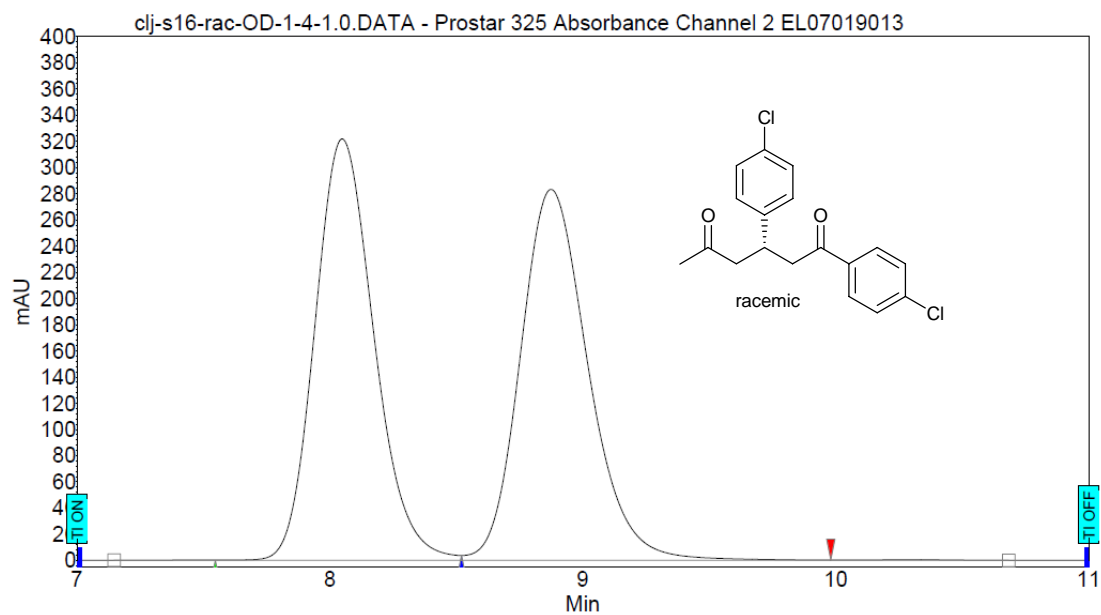

Peak results :

| Index | Name    | Time [Min] | Quantity [% Area] | Height [mAU] | Area [mAU.Min] | Area % [%] |
|-------|---------|------------|-------------------|--------------|----------------|------------|
| 1     | UNKNOWN | 8.05       | 49.76             | 321.8        | 86.9           | 49.762     |
| 2     | UNKNOWN | 8.87       | 50.24             | 283.2        | 87.8           | 50.238     |
| Total |         |            | 100.00            | 605.0        | 174.7          | 100.000    |

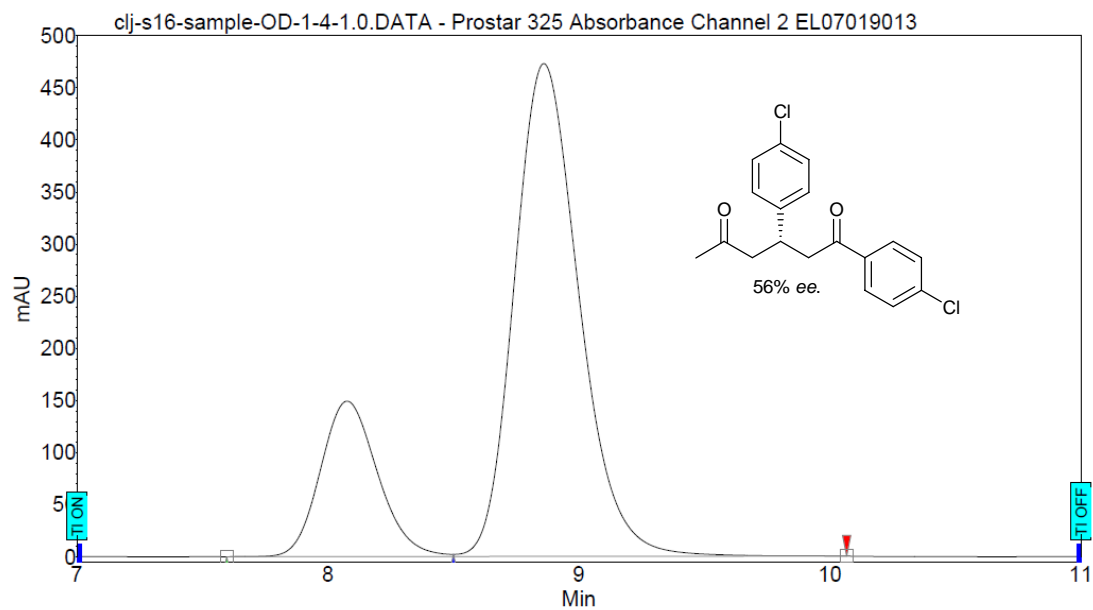

Peak results :

| Index | Name    | Time [Min] | Quantity [% Area] | Height [mAU] | Area [mAU.Min] | Area % [%] |
|-------|---------|------------|-------------------|--------------|----------------|------------|
| 1     | UNKNOWN | 8.08       | 21.80             | 149.1        | 39.3           | 21.797     |
| 2     | UNKNOWN | 8.86       | 78.20             | 472.8        | 141.1          | 78.203     |
| Total |         |            | 100.00            | 621.9        | 180.5          | 100.000    |

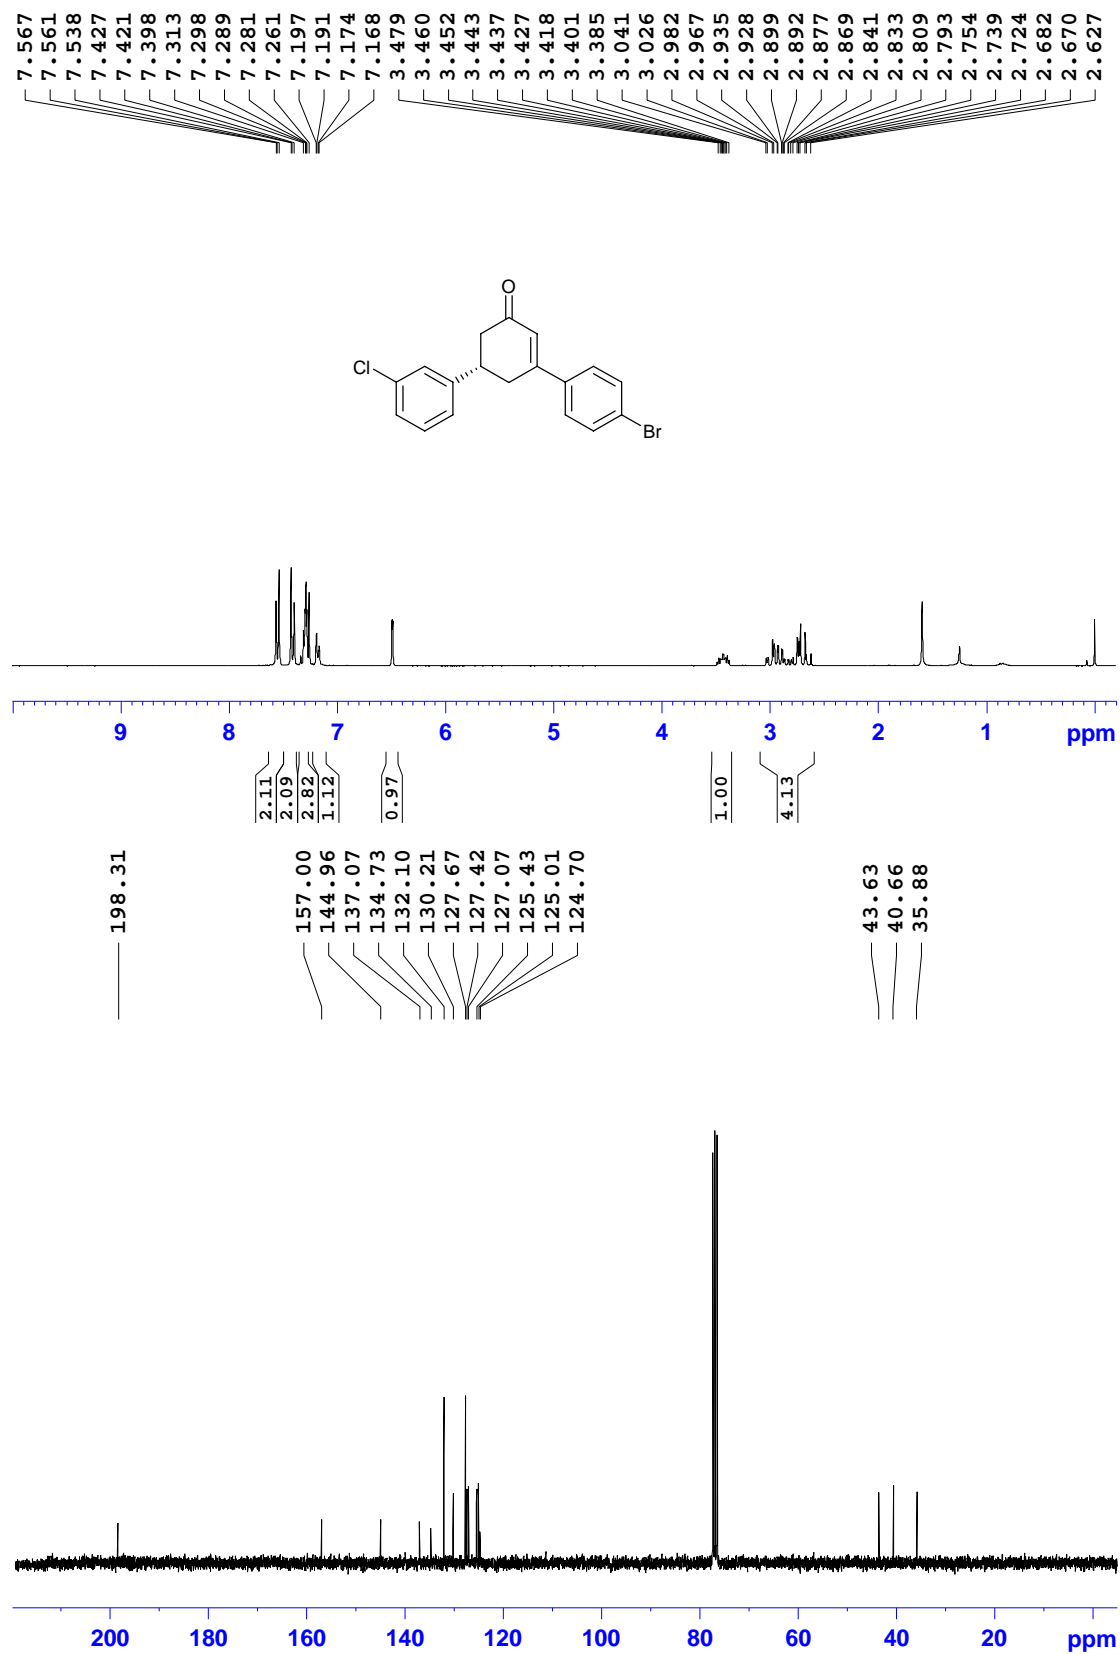

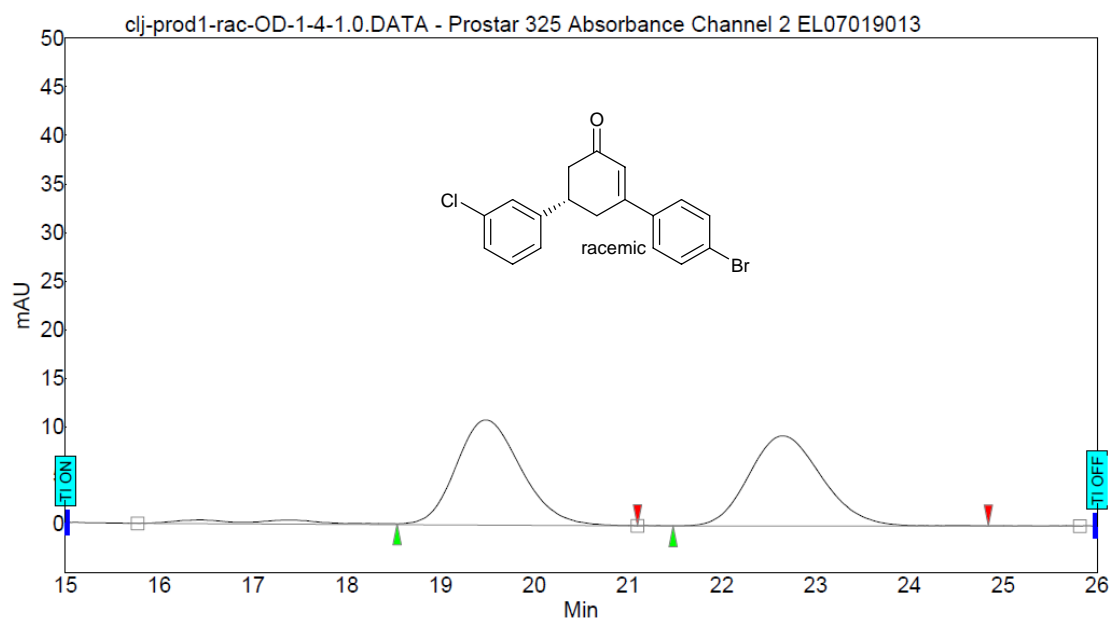

Peak results :

| Index | Name    | Time [Min] | Quantity [% Area] | Height [mAU] | Area [mAU.Min] | Area % [%] |
|-------|---------|------------|-------------------|--------------|----------------|------------|
| 1     | UNKNOWN | 19.48      | 51.04             | 10.8         | 8.7            | 51.040     |
| 2     | UNKNOWN | 22.65      | 48.96             | 9.3          | 8.4            | 48.960     |
| Total |         |            | 100.00            | 20.1         | 17.1           | 100.000    |

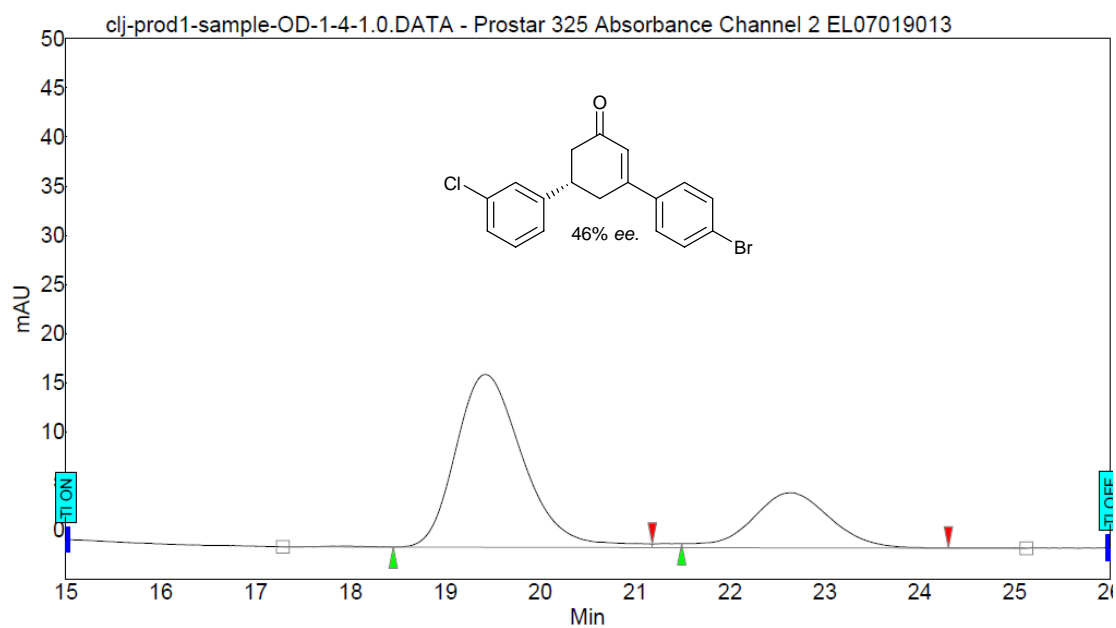

Peak results :

| Index | Name    | Time [Min] | Quantity [% Area] | Height [mAU] | Area [mAU.Min] | Area % [%] |
|-------|---------|------------|-------------------|--------------|----------------|------------|
| 1     | UNKNOWN | 19.42      | 72.95             | 17.6         | 14.4           | 72.953     |
| 2     | UNKNOWN | 22.65      | 27.05             | 5.6          | 5.3            | 27.047     |
| Total |         |            | 100.00            | 23.2         | 19.8           | 100.000    |

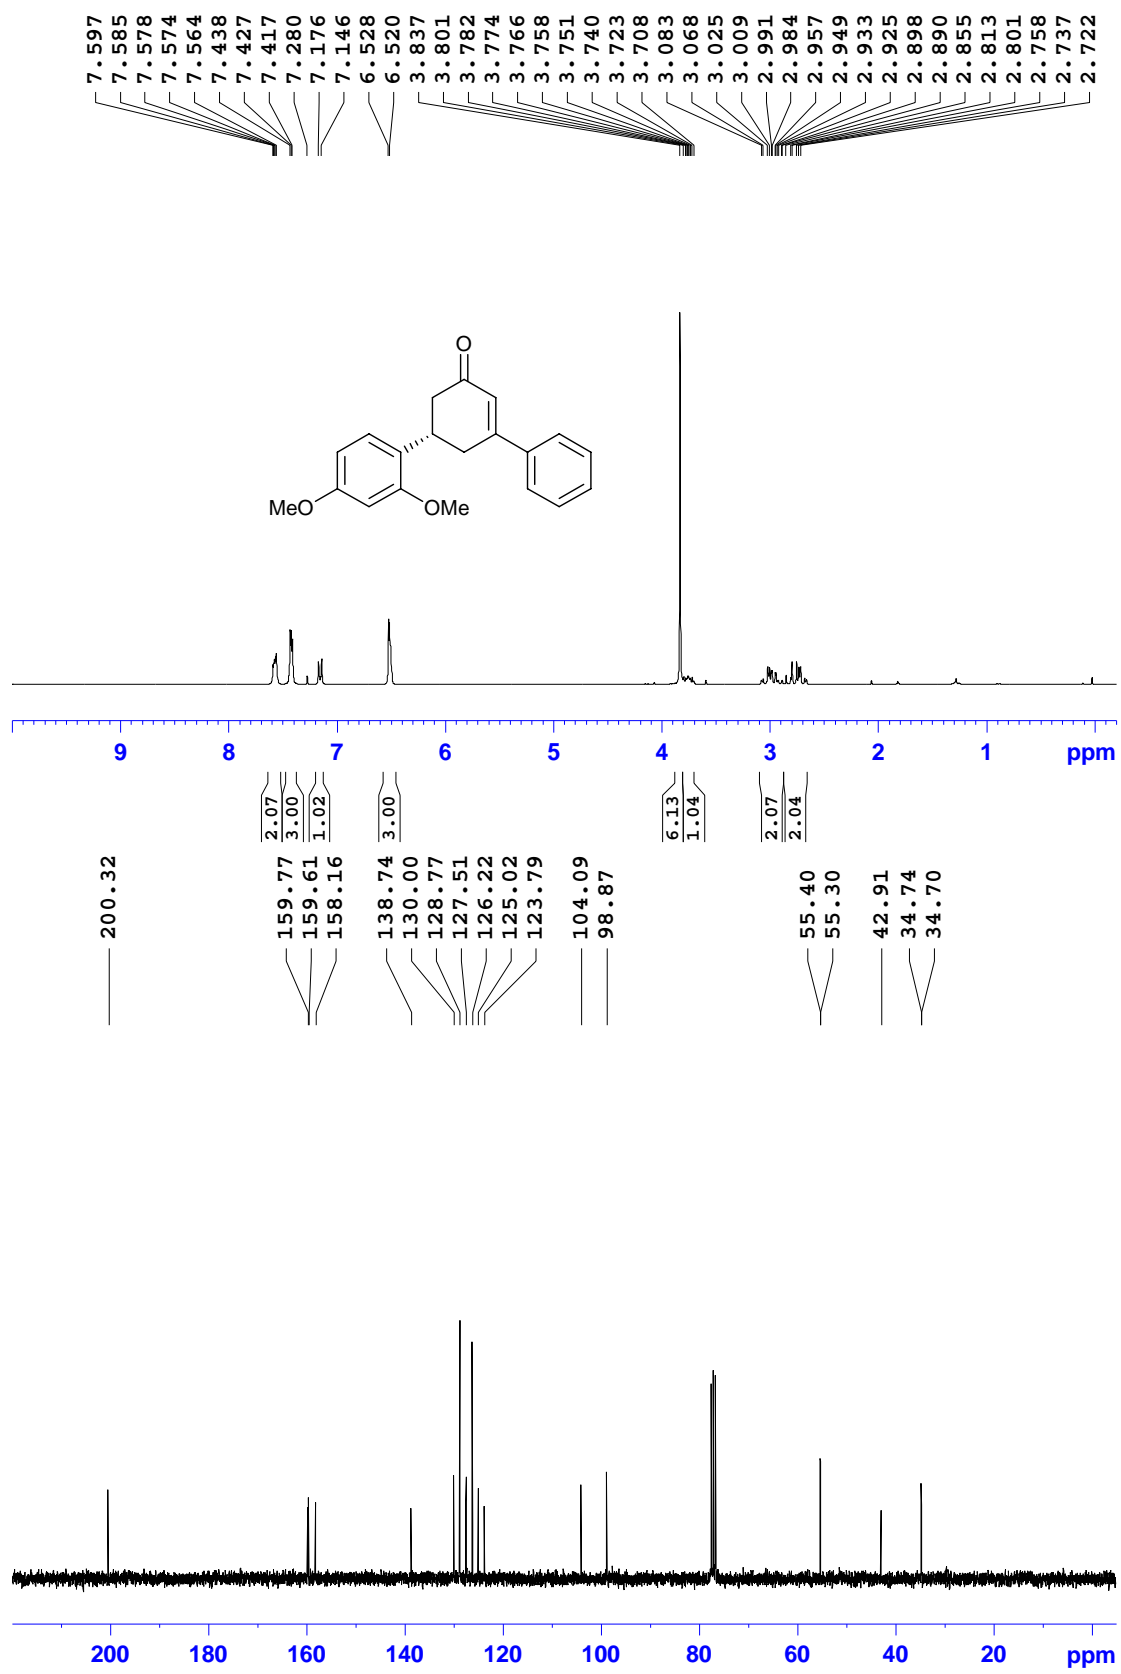

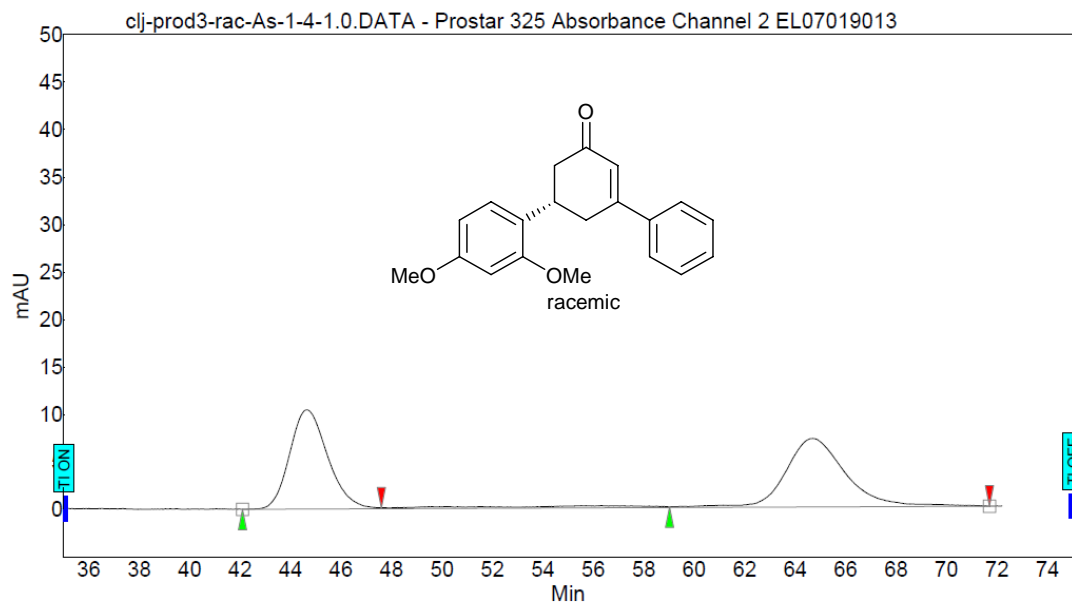

Peak results :

| Index | Name    | Time [Min] | Quantity [% Area] | Height [mAU] | Area [mAU.Min] | Area % [%] |
|-------|---------|------------|-------------------|--------------|----------------|------------|
| 1     | UNKNOWN | 44.66      | 47.71             | 10.4         | 18.2           | 47.714     |
| 2     | UNKNOWN | 64.70      | 52.29             | 7.2          | 20.0           | 52.286     |
| Total |         |            | 100.00            | 17.6         | 38.2           | 100.000    |

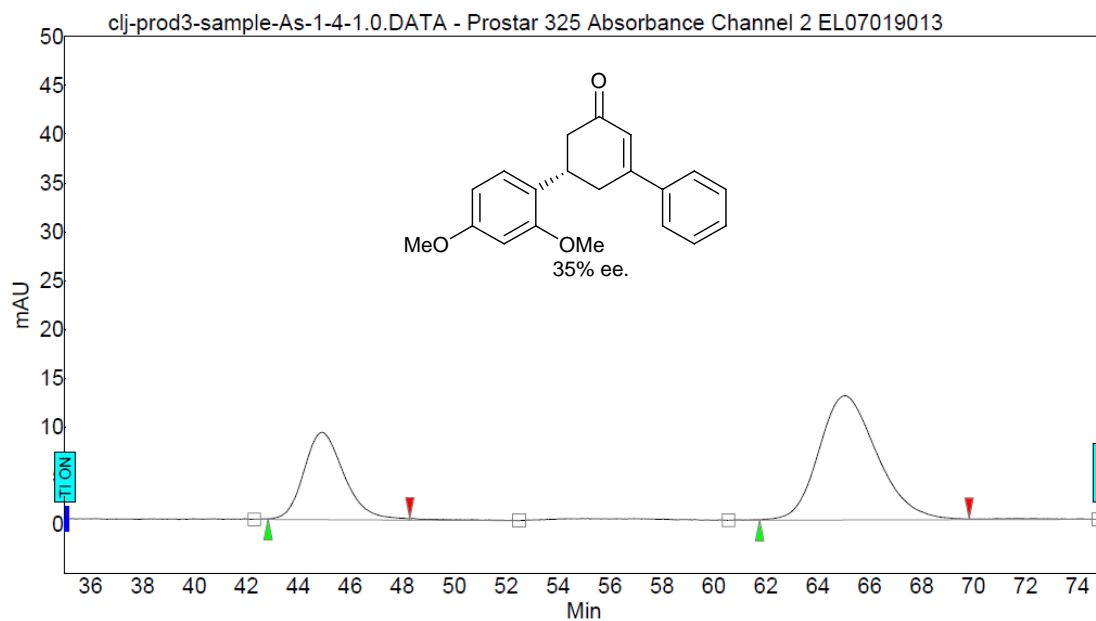

Peak results :

| Index | Name    | Time [Min] | Quantity [% Area] | Height [mAU] | Area [mAU.Min] | Area % [%] |
|-------|---------|------------|-------------------|--------------|----------------|------------|
| 1     | UNKNOWN | 44.90      | 32.69             | 8.9          | 16.1           | 32.689     |
| 2     | UNKNOWN | 65.02      | 67.31             | 12.7         | 33.1           | 67.311     |
| Total |         |            | 100.00            | 21.7         | 49.2           | 100.000    |

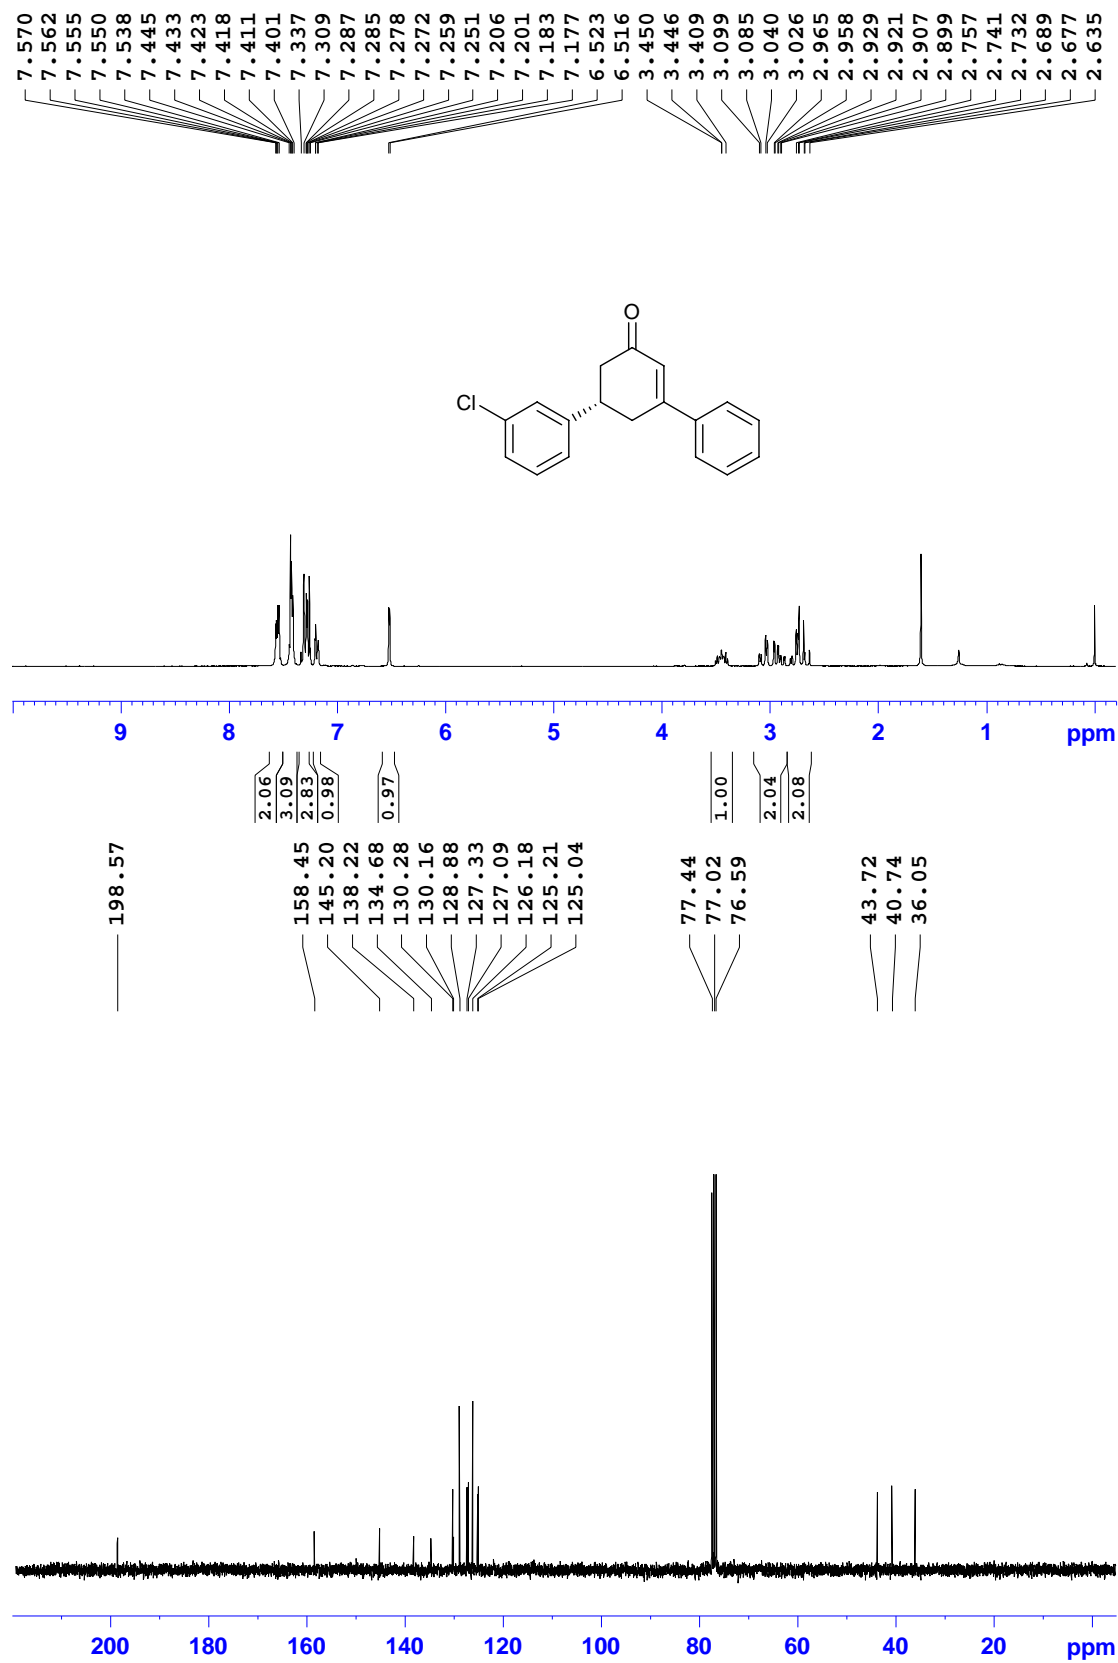



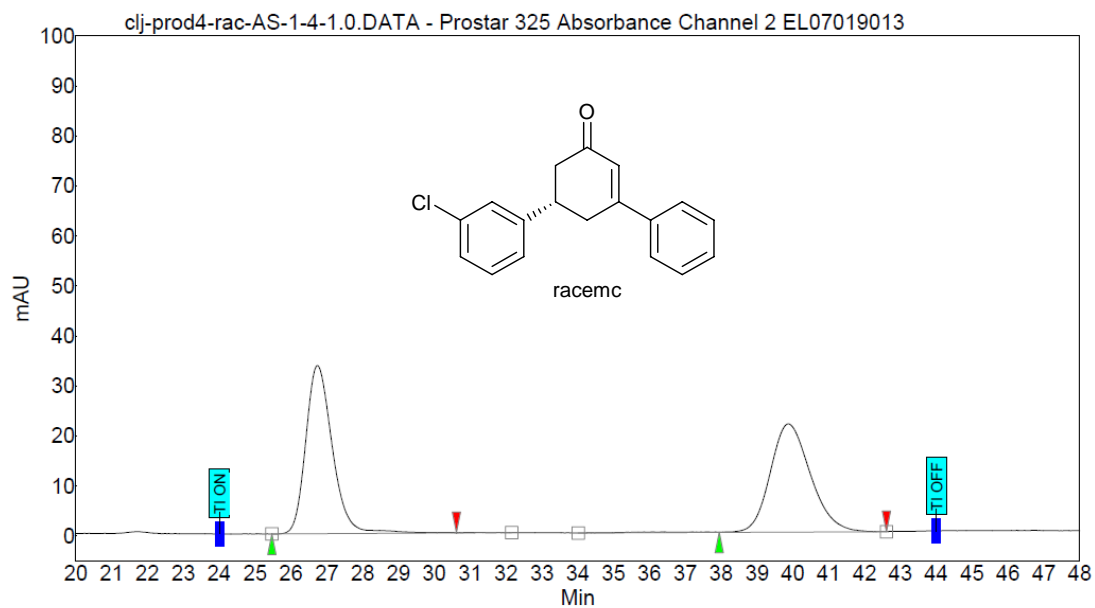

**Peak results :**

| Index | Name    | Time [Min] | Quantity [% Area] | Height [mAU] | Area [mAU.Min] | Area % [%] |
|-------|---------|------------|-------------------|--------------|----------------|------------|
| 1     | UNKNOWN | 26.74      | 50.89             | 33.6         | 29.1           | 50.887     |
| 2     | UNKNOWN | 39.87      | 49.11             | 21.6         | 28.0           | 49.113     |
| Total |         |            | 100.00            | 55.3         | 57.1           | 100.000    |

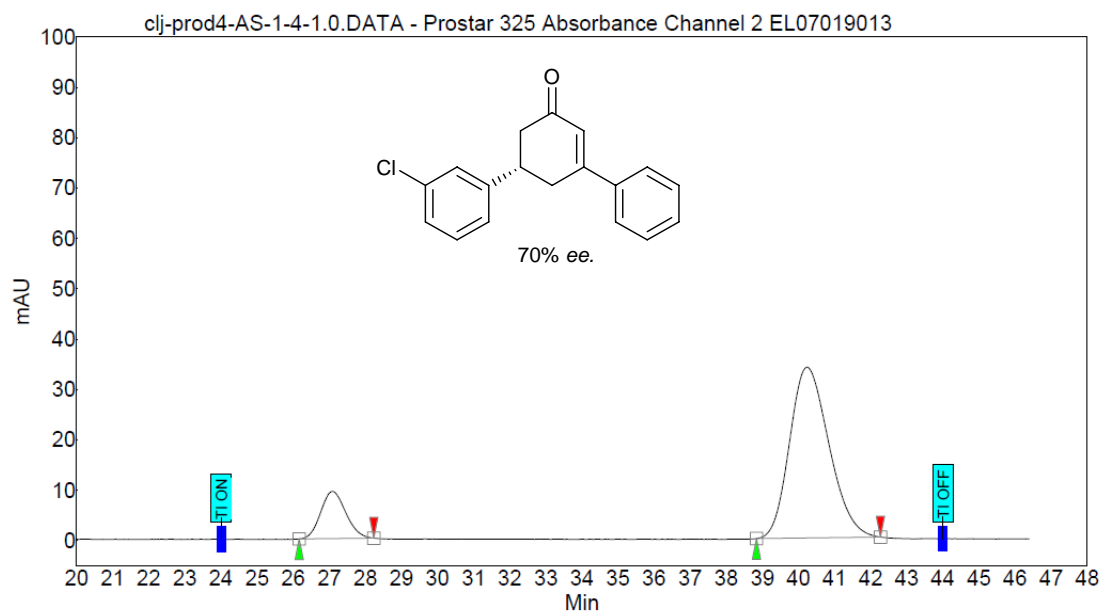

**Peak results :**

| Index | Name    | Time [Min] | Quantity [% Area] | Height [mAU] | Area [mAU.Min] | Area % [%] |
|-------|---------|------------|-------------------|--------------|----------------|------------|
| 1     | UNKNOWN | 27.08      | 14.93             | 9.4          | 7.5            | 14.931     |
| 2     | UNKNOWN | 40.23      | 85.07             | 33.9         | 42.8           | 85.069     |
| Total |         |            | 100.00            | 43.3         | 50.3           | 100.000    |

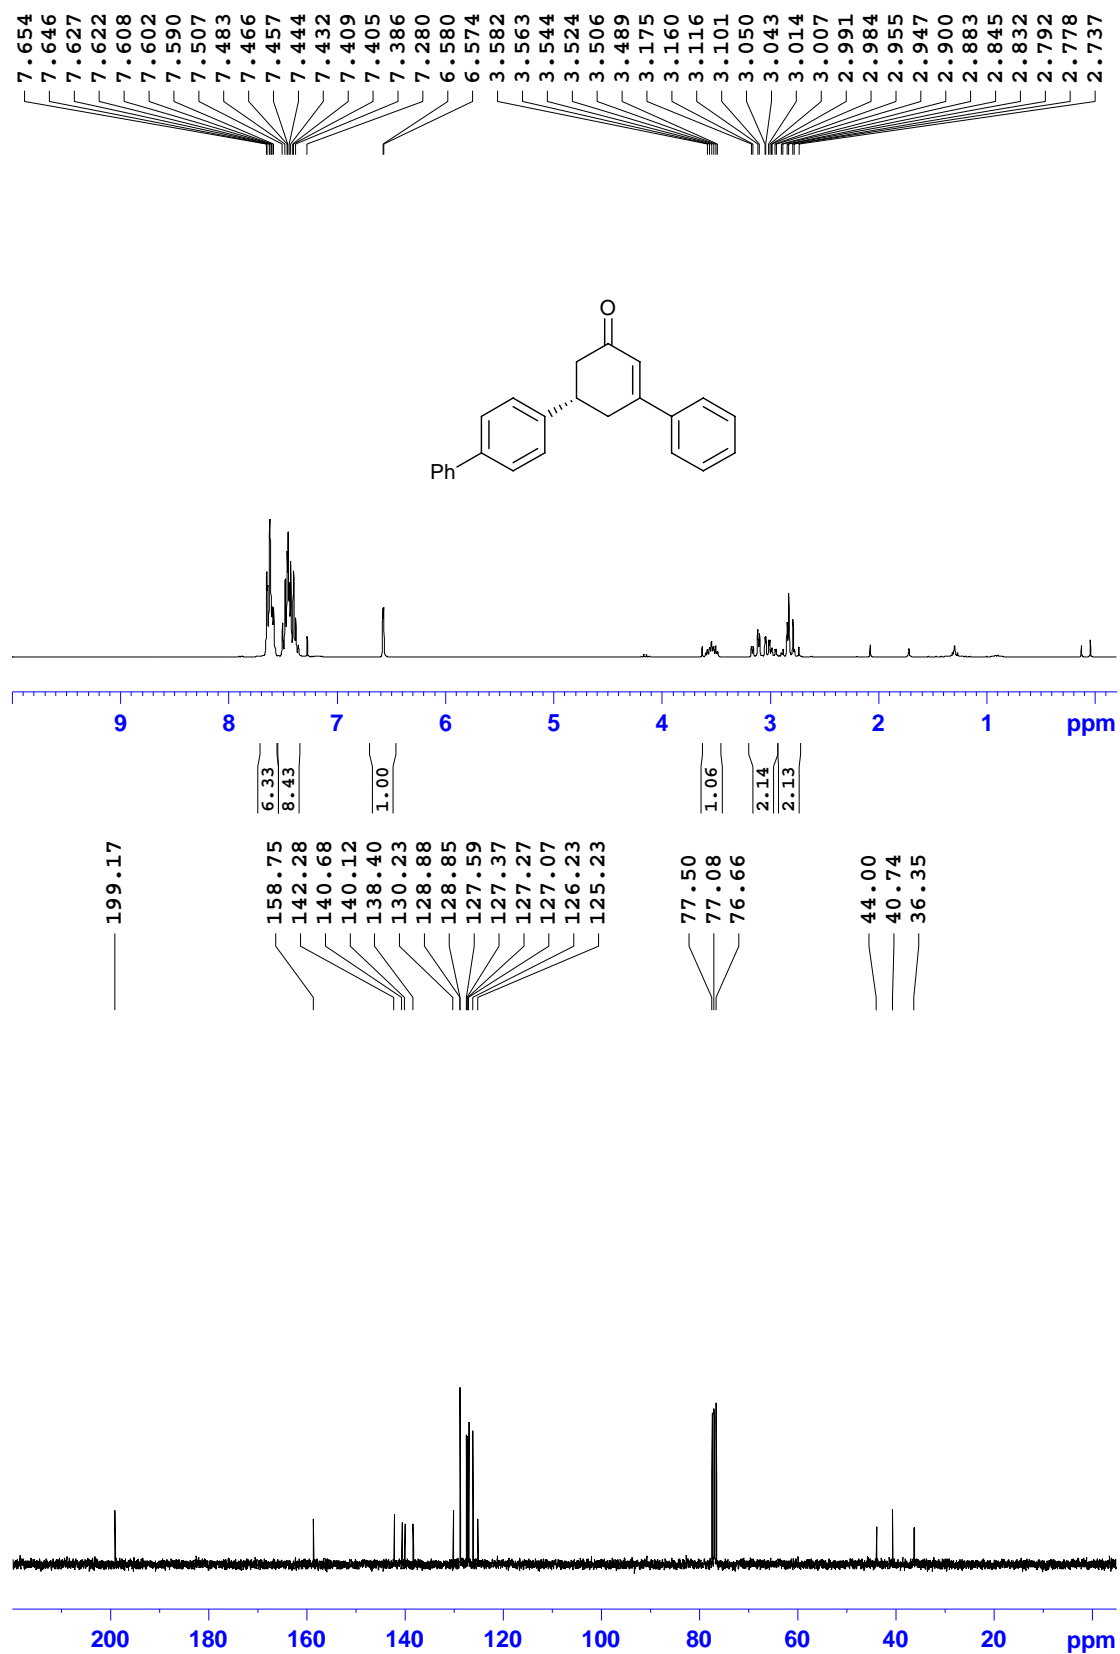

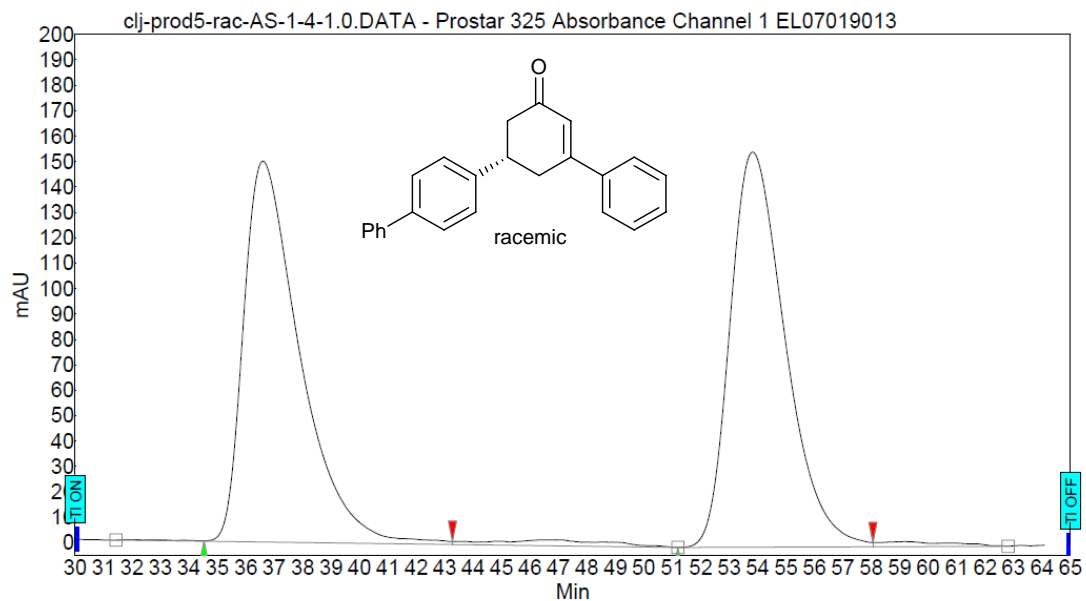

Peak results :

| Index | Name    | Time [Min] | Quantity [% Area] | Height [mAU] | Area [mAU.Min] | Area % [%] |
|-------|---------|------------|-------------------|--------------|----------------|------------|
| 1     | UNKNOWN | 36.60      | 49.61             | 149.8        | 343.6          | 49.606     |
| 2     | UNKNOWN | 53.83      | 50.39             | 155.5        | 349.0          | 50.394     |
| Total |         |            | 100.00            | 305.3        | 692.6          | 100.000    |

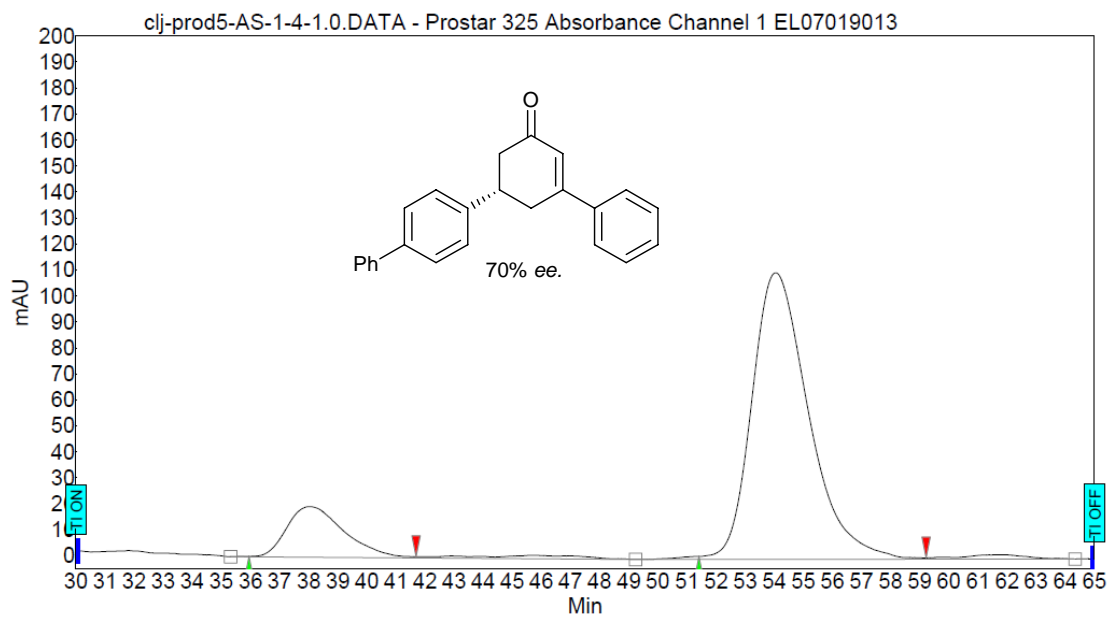

Peak results :

| Index | Name    | Time [Min] | Quantity [% Area] | Height [mAU] | Area [mAU.Min] | Area % [%] |
|-------|---------|------------|-------------------|--------------|----------------|------------|
| 1     | UNKNOWN | 38.02      | 15.17             | 19.5         | 44.5           | 15.168     |
| 2     | UNKNOWN | 54.06      | 84.83             | 110.3        | 248.6          | 84.832     |
| Total |         |            | 100.00            | 129.8        | 293.1          | 100.000    |

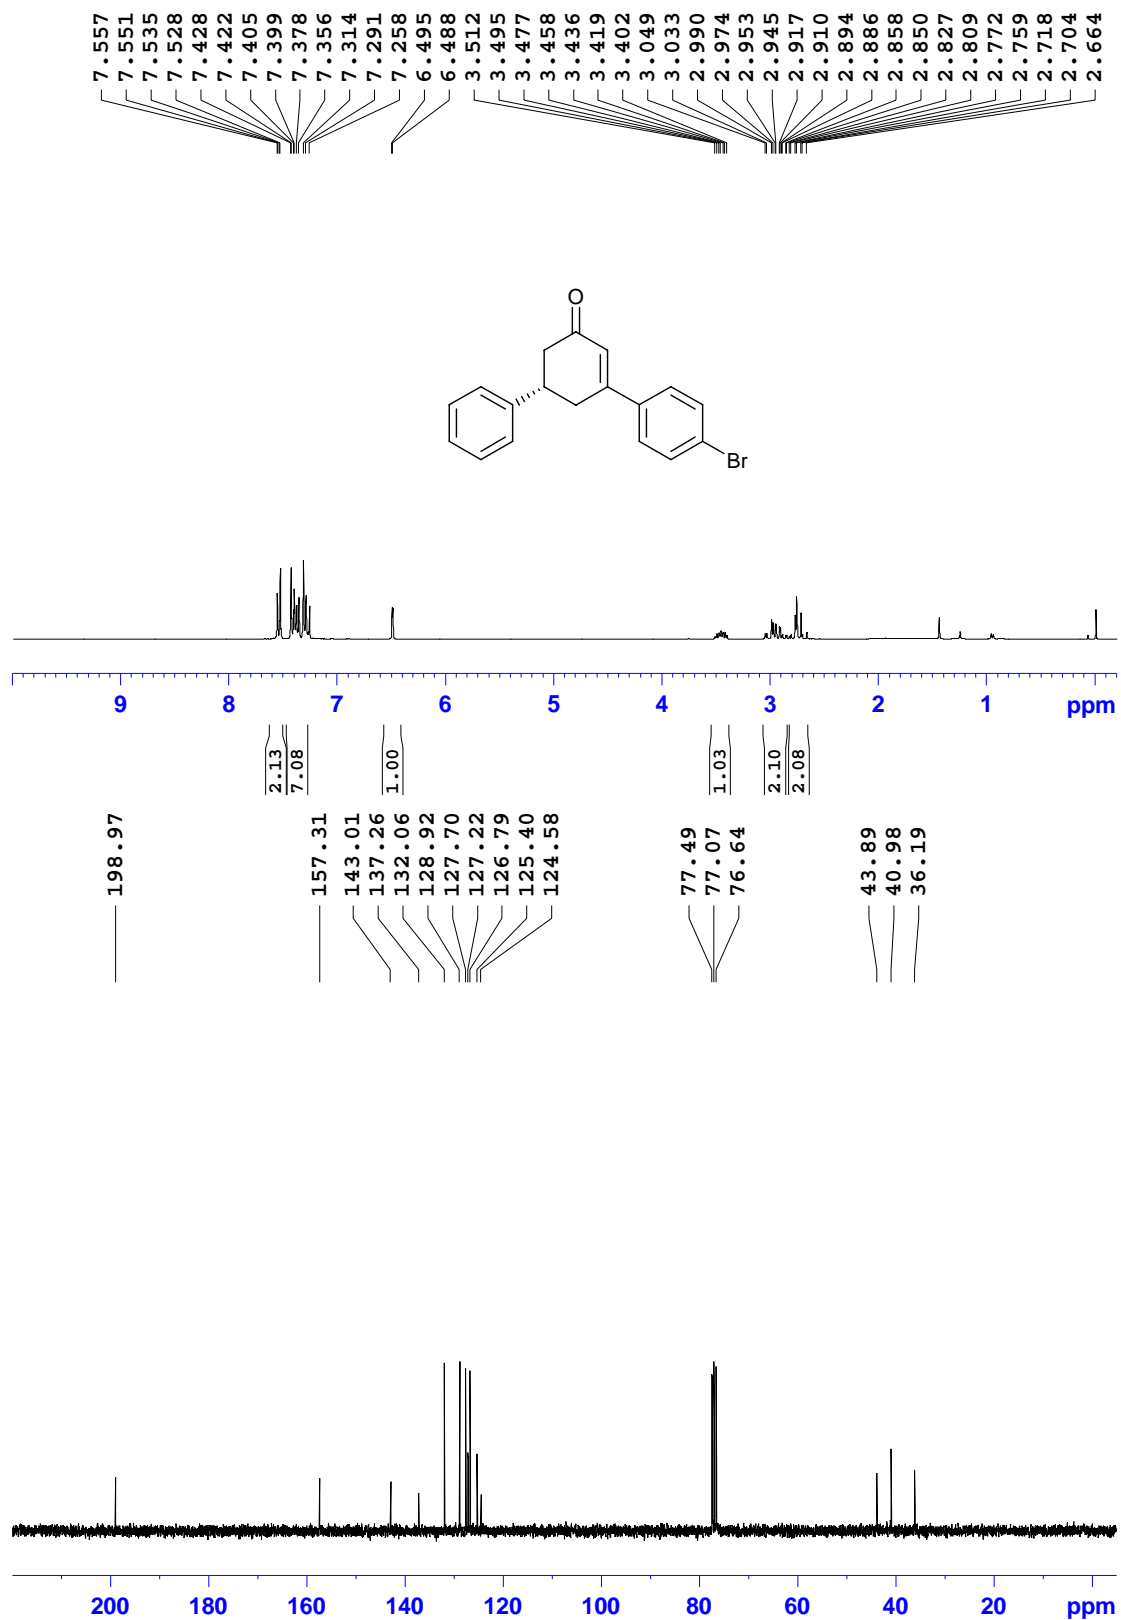

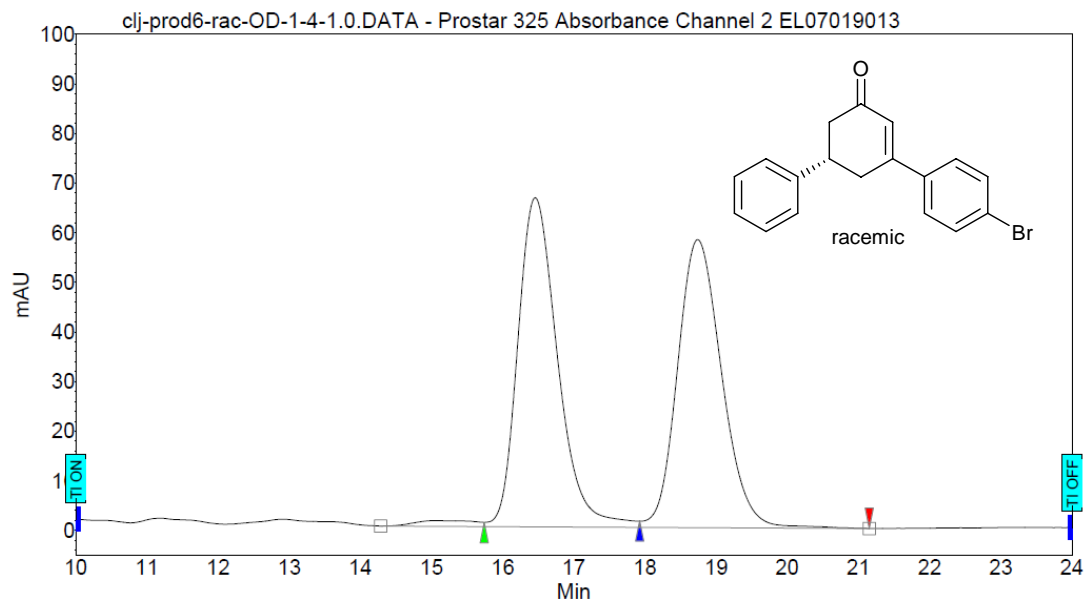

**Peak results :**

| Index | Name    | Time [Min] | Quantity [% Area] | Height [mAU] | Area [mAU.Min] | Area % [%] |
|-------|---------|------------|-------------------|--------------|----------------|------------|
| 1     | UNKNOWN | 16.46      | 50.74             | 66.3         | 43.0           | 50.737     |
| 2     | UNKNOWN | 18.74      | 49.26             | 58.0         | 41.8           | 49.263     |
| Total |         |            | 100.00            | 124.3        | 84.8           | 100.000    |

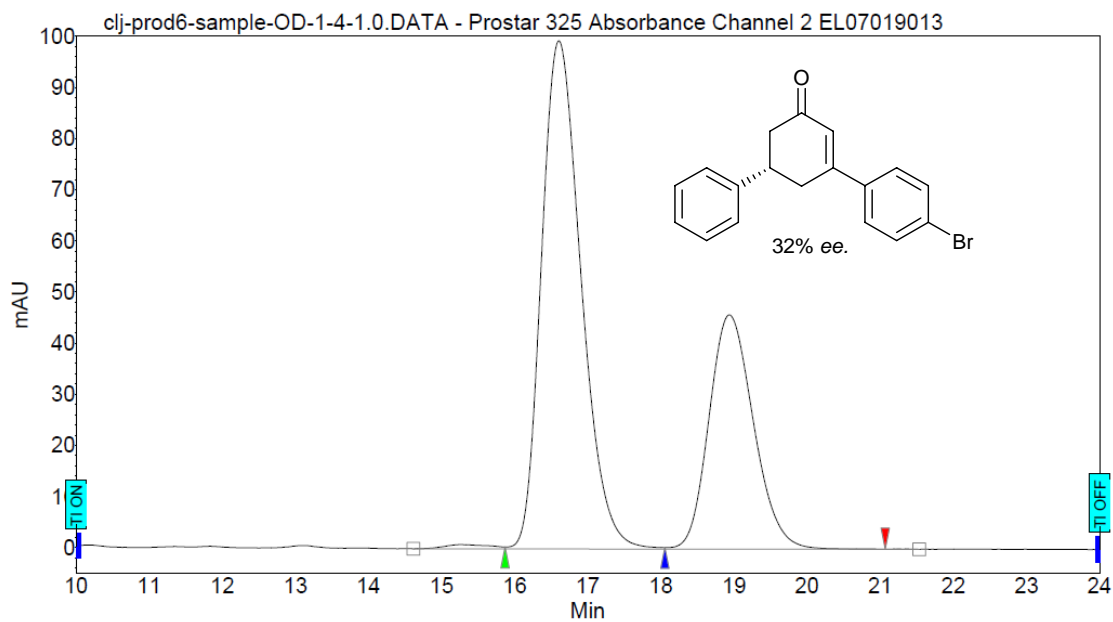

**Peak results :**

| Index | Name    | Time [Min] | Quantity [% Area] | Height [mAU] | Area [mAU.Min] | Area % [%] |
|-------|---------|------------|-------------------|--------------|----------------|------------|
| 1     | UNKNOWN | 16.60      | 65.89             | 99.3         | 62.4           | 65.891     |
| 2     | UNKNOWN | 18.93      | 34.11             | 45.8         | 32.3           | 34.109     |
| Total |         |            | 100.00            | 145.1        | 94.7           | 100.000    |

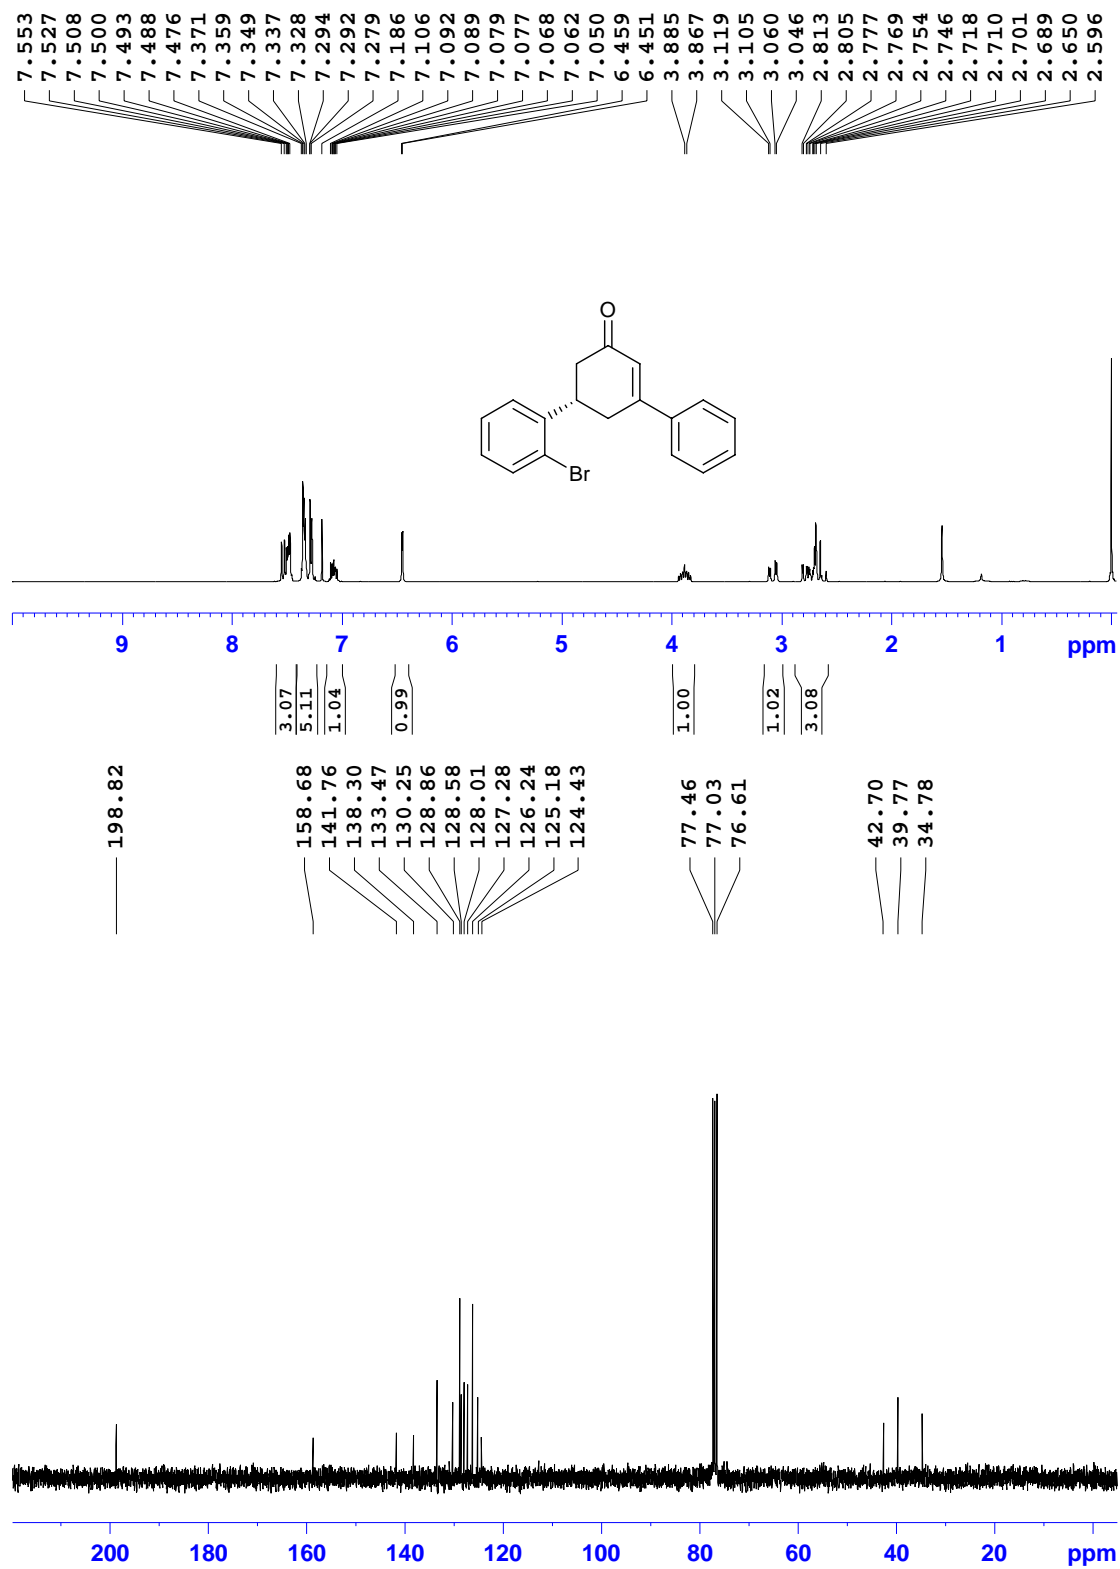

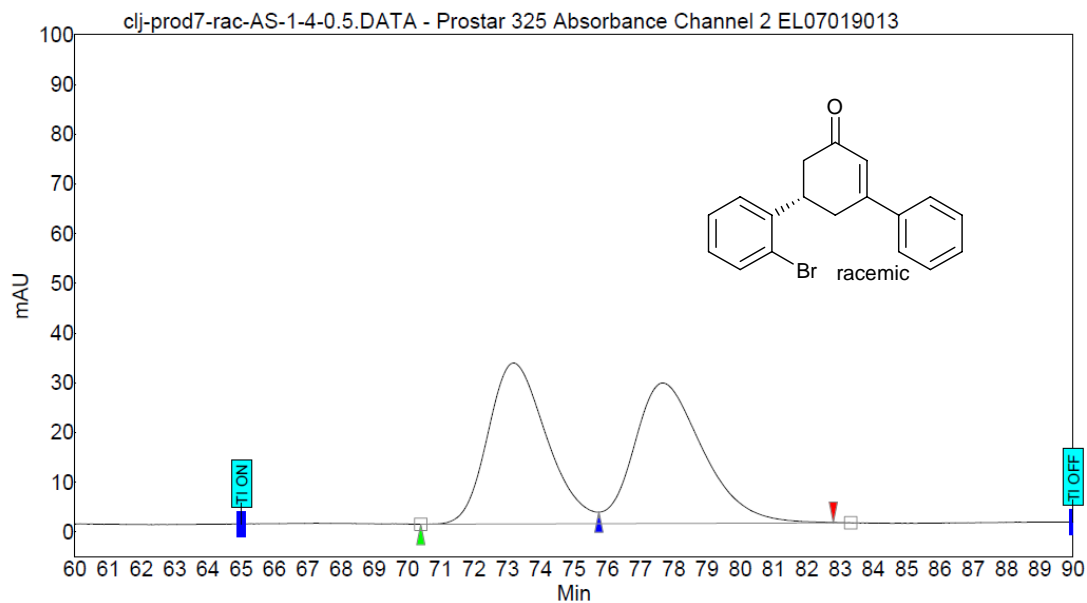

Peak results :

| Index | Name    | Time [Min] | Quantity [% Area] | Height [mAU] | Area [mAU Min] | Area % [%] |
|-------|---------|------------|-------------------|--------------|----------------|------------|
| 1     | UNKNOWN | 73.19      | 49.49             | 32.4         | 66.1           | 49.488     |
| 2     | UNKNOWN | 77.66      | 50.51             | 28.2         | 67.4           | 50.512     |
| Total |         |            | 100.00            | 60.6         | 133.5          | 100.000    |

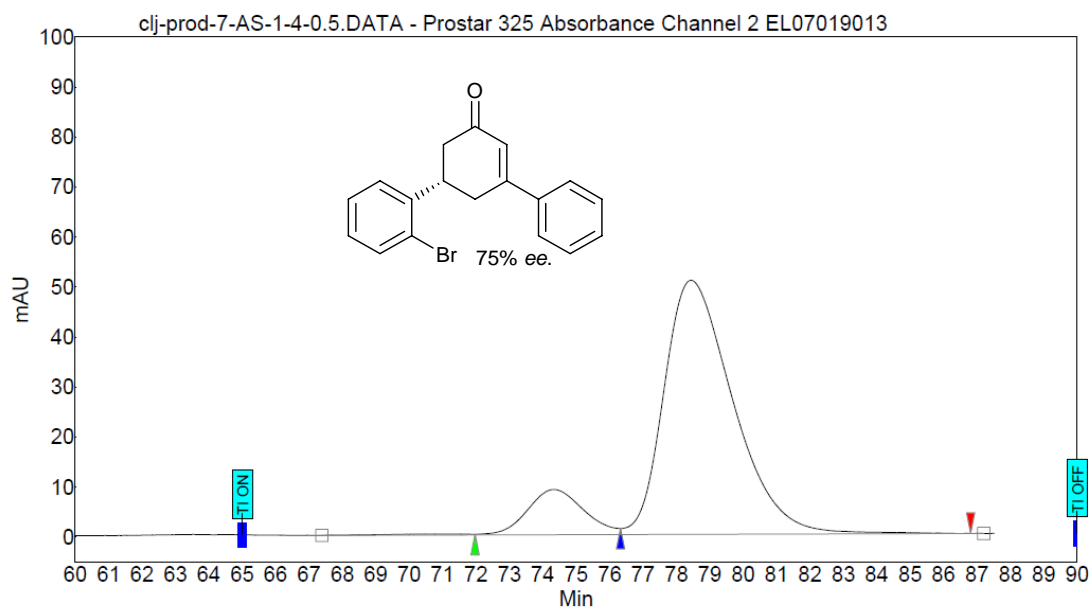

Peak results :

| Index | Name    | Time [Min] | Quantity [% Area] | Height [mAU] | Area [mAU Min] | Area % [%] |
|-------|---------|------------|-------------------|--------------|----------------|------------|
| 1     | UNKNOWN | 74.30      | 12.61             | 9.0          | 17.5           | 12.607     |
| 2     | UNKNOWN | 78.44      | 87.39             | 50.8         | 121.5          | 87.393     |
| Total |         |            | 100.00            | 59.8         | 139.0          | 100.000    |

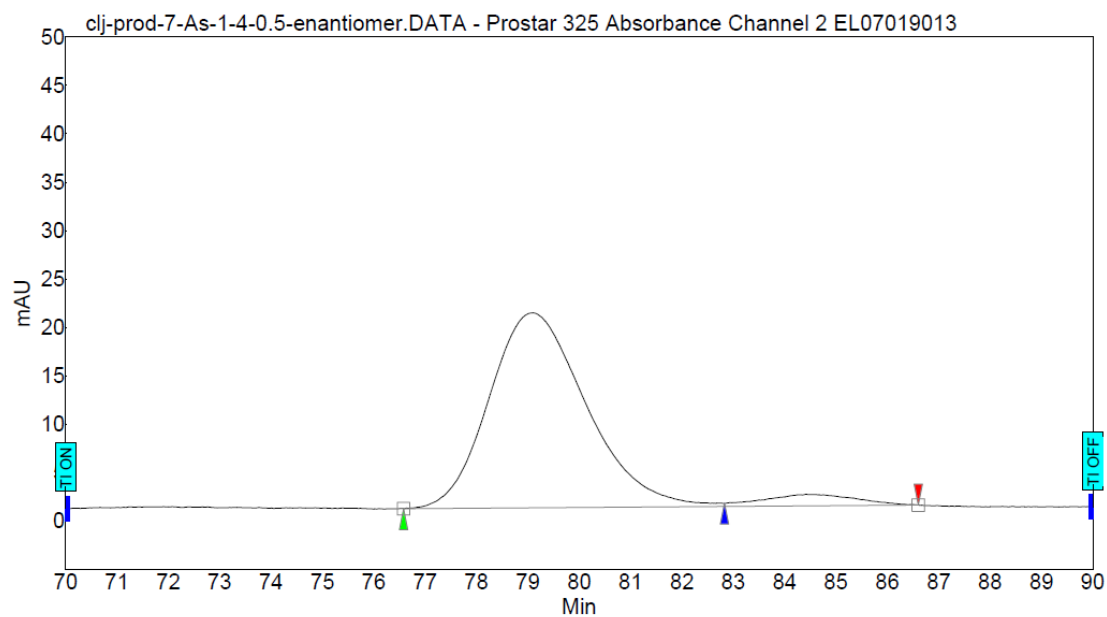

**Peak results :**

| Index | Name    | Time [Min] | Quantity [% Area] | Height [mAU] | Area [mAU.Min] | Area % [%] |
|-------|---------|------------|-------------------|--------------|----------------|------------|
| 1     | UNKNOWN | 79.10      | 94.70             | 20.1         | 44.1           | 94.696     |
| 2     | UNKNOWN | 84.41      | 5.30              | 1.2          | 2.5            | 5.304      |
| Total |         |            | 100.00            | 21.3         | 46.5           | 100.000    |



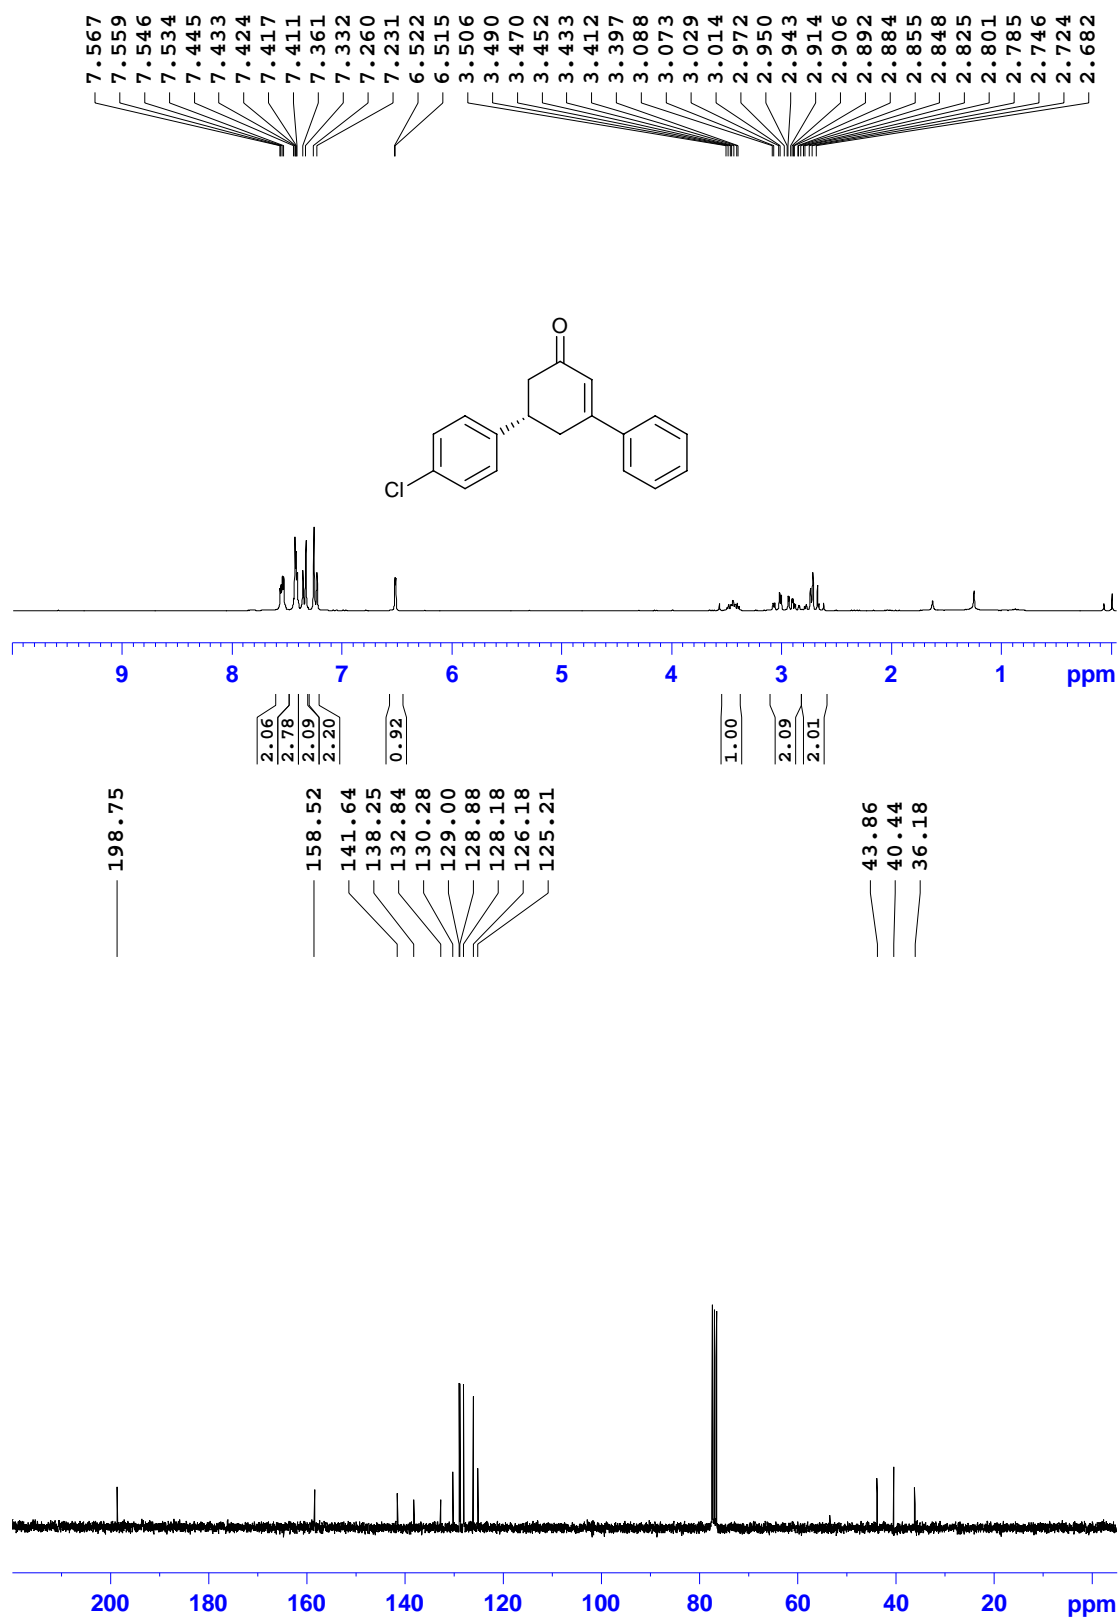

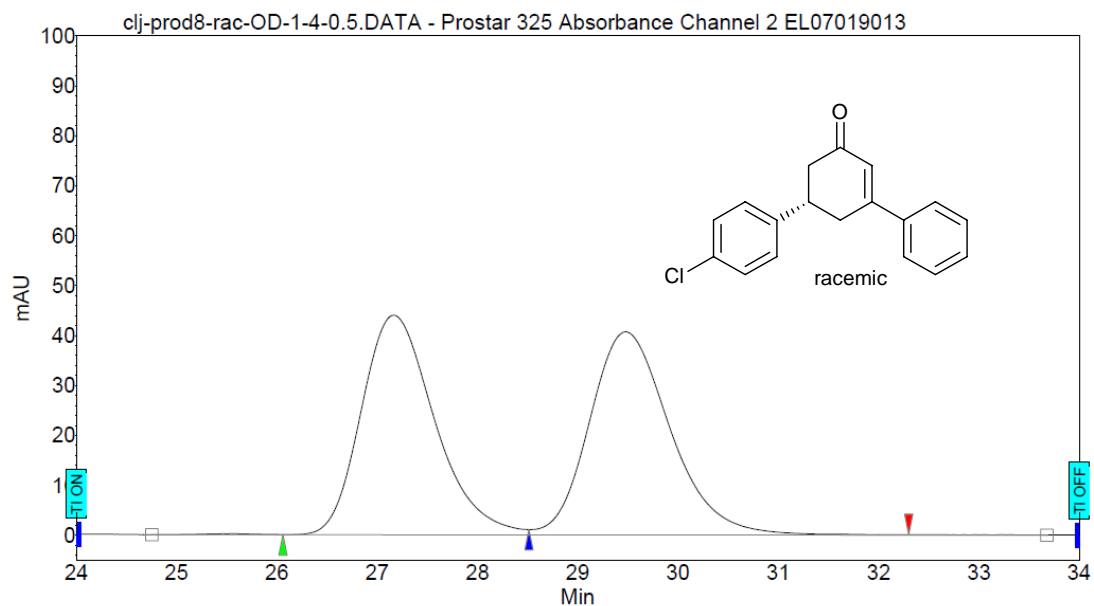

Peak results :

| Index | Name    | Time [Min] | Quantity [% Area] | Height [mAU] | Area [mAU.Min] | Area % [%] |
|-------|---------|------------|-------------------|--------------|----------------|------------|
| 1     | UNKNOWN | 27.16      | 49.53             | 44.0         | 37.2           | 49.531     |
| 2     | UNKNOWN | 29.48      | 50.47             | 40.7         | 37.9           | 50.469     |
| Total |         |            | 100.00            | 84.6         | 75.2           | 100.000    |

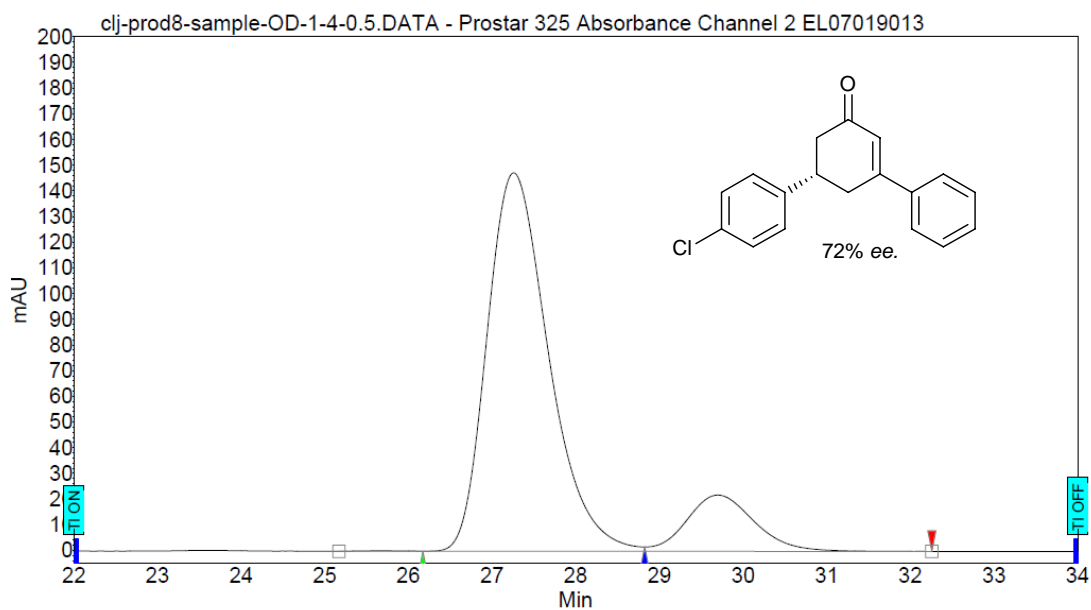

Peak results :

| Index | Name    | Time [Min] | Quantity [% Area] | Height [mAU] | Area [mAU.Min] | Area % [%] |
|-------|---------|------------|-------------------|--------------|----------------|------------|
| 1     | UNKNOWN | 27.26      | 85.91             | 147.4        | 125.4          | 85.911     |
| 2     | UNKNOWN | 29.70      | 14.09             | 21.9         | 20.6           | 14.089     |
| Total |         |            | 100.00            | 169.4        | 146.0          | 100.000    |

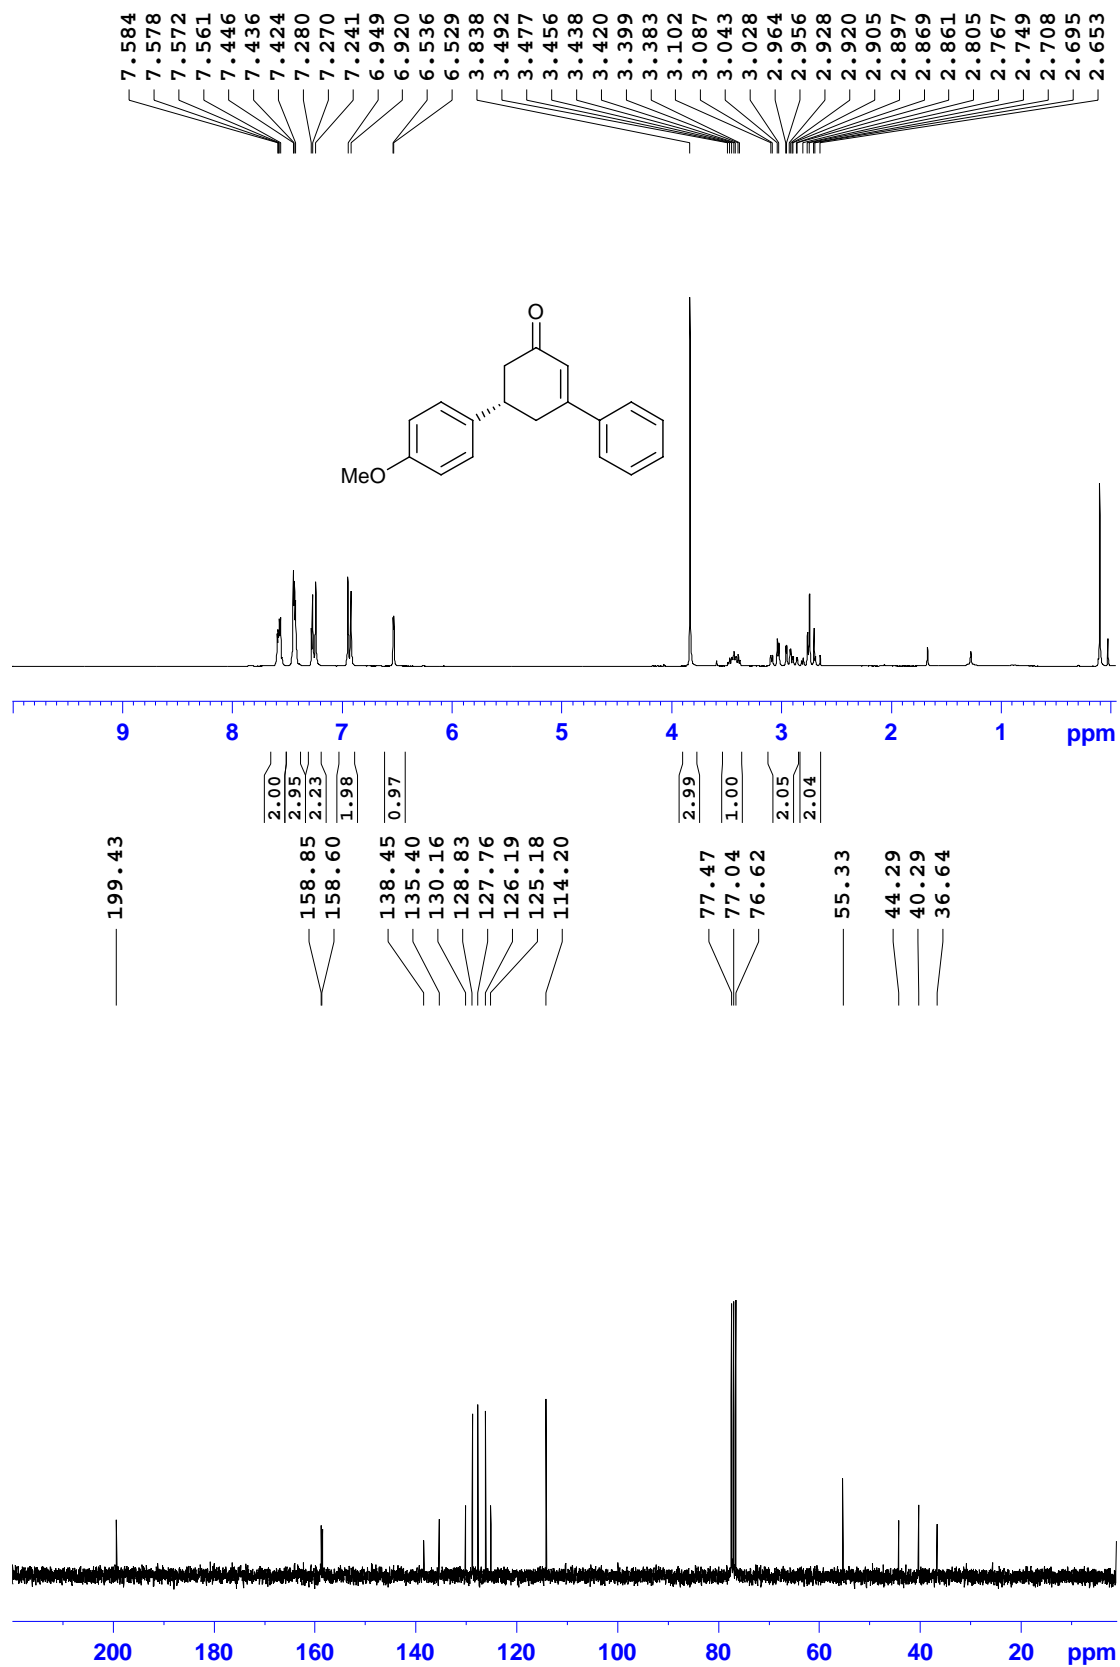

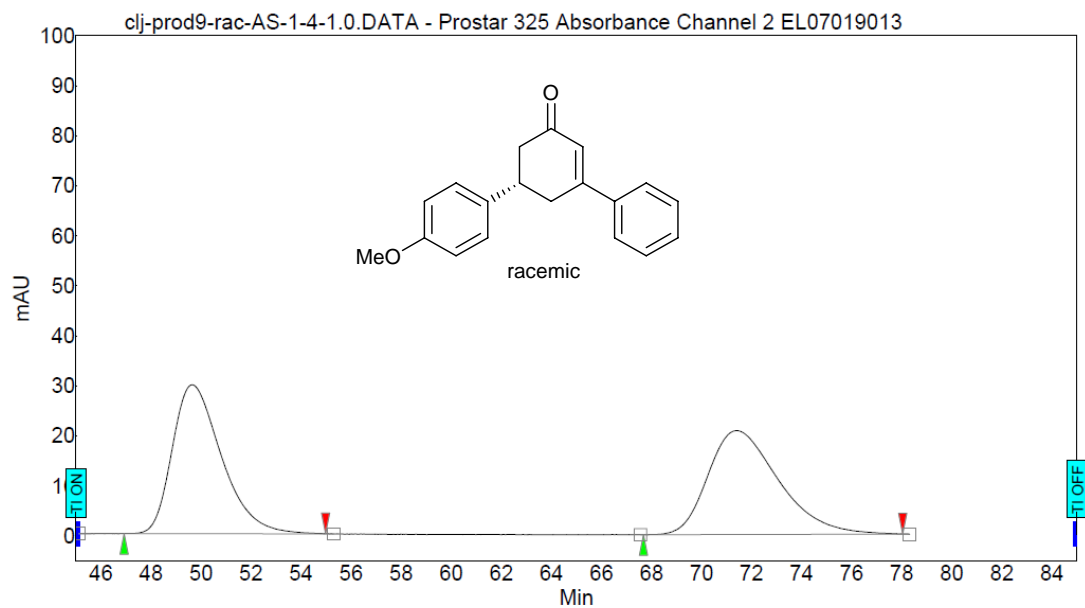

Peak results :

| Index | Name    | Time [Min] | Quantity [% Area] | Height [mAU] | Area [mAU.Min] | Area % [%] |
|-------|---------|------------|-------------------|--------------|----------------|------------|
| 1     | UNKNOWN | 49.65      | 50.11             | 29.8         | 68.1           | 50.111     |
| 2     | UNKNOWN | 71.39      | 49.89             | 20.8         | 67.7           | 49.889     |
| Total |         |            | 100.00            | 50.6         | 135.8          | 100.000    |

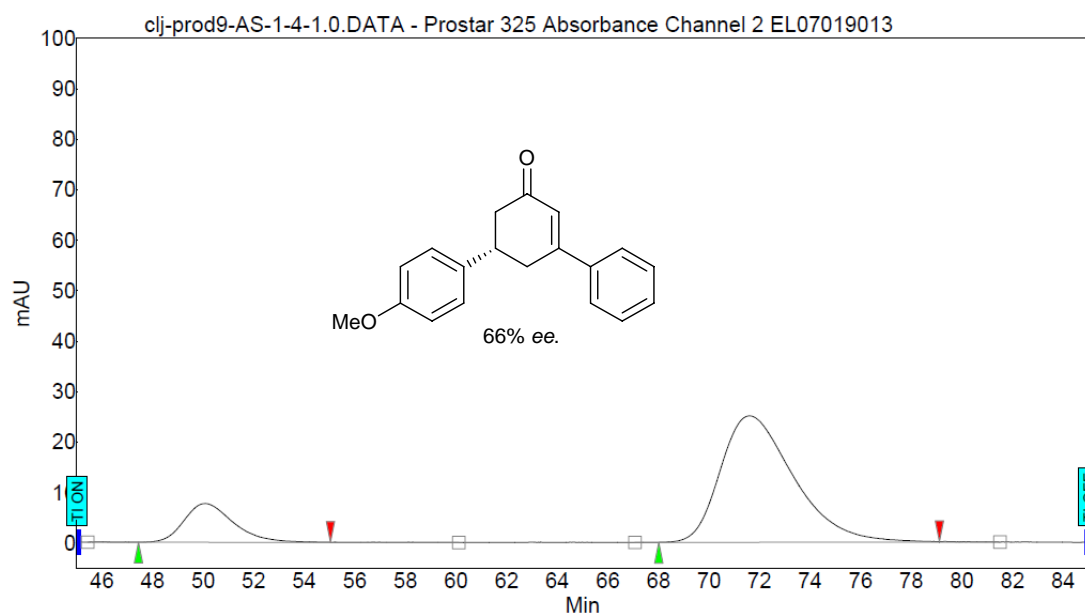

Peak results :

| Index | Name    | Time [Min] | Quantity [% Area] | Height [mAU] | Area [mAU.Min] | Area % [%] |
|-------|---------|------------|-------------------|--------------|----------------|------------|
| 1     | UNKNOWN | 50.08      | 17.15             | 7.7          | 17.4           | 17.155     |
| 2     | UNKNOWN | 71.59      | 82.85             | 25.1         | 84.1           | 82.845     |
| Total |         |            | 100.00            | 32.8         | 101.5          | 100.000    |

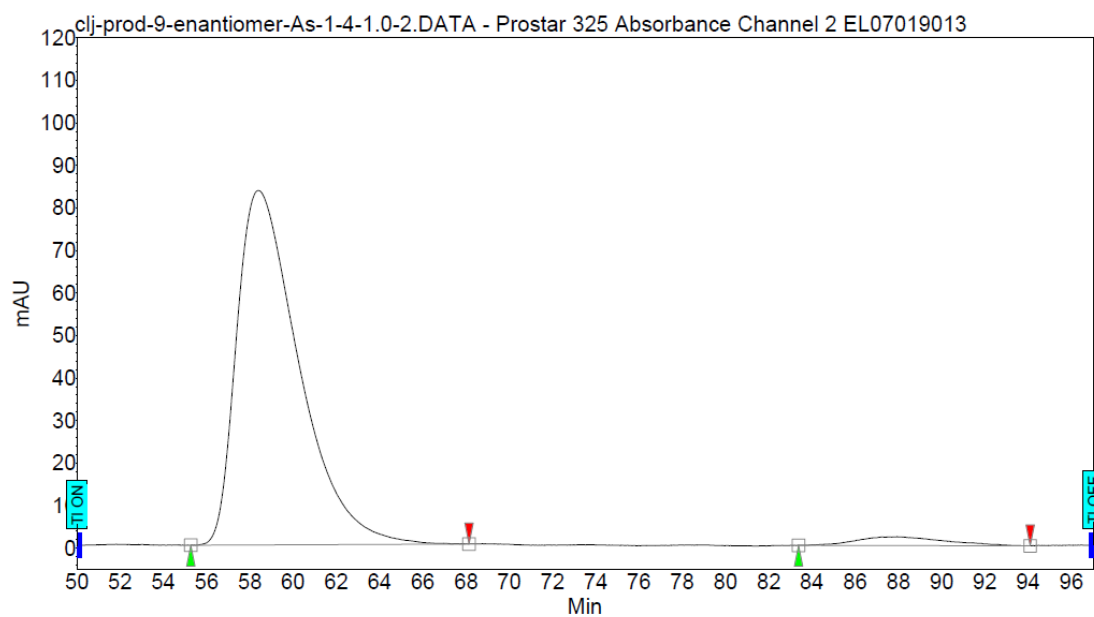

**Peak results :**

| Index | Name    | Time [Min] | Quantity [% Area] | Height [mAU] | Area [mAU.Min] | Area % [%] |
|-------|---------|------------|-------------------|--------------|----------------|------------|
| 1     | UNKNOWN | 58.39      | 96.59             | 83.4         | 277.8          | 96.589     |
| 2     | UNKNOWN | 87.93      | 3.41              | 2.1          | 9.8            | 3.411      |
|       |         |            |                   |              |                |            |
| Total |         |            | 100.00            | 85.4         | 287.6          | 100.000    |

7.572  
7.564  
7.557  
7.552  
7.540  
7.437  
7.425  
7.415  
7.404  
7.380  
7.374  
7.354  
7.349  
7.329  
7.325  
7.305  
7.301  
7.280  
7.276  
7.254  
7.249  
7.243  
7.224  
7.218  
7.199  
6.528  
6.521  
3.999  
3.985  
3.979  
3.963  
3.168  
3.154  
3.109  
3.095  
2.910  
2.902  
2.874  
2.866  
2.851  
2.843  
2.766  
2.745  
2.730

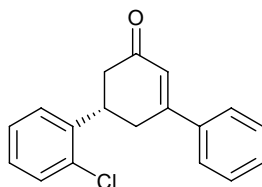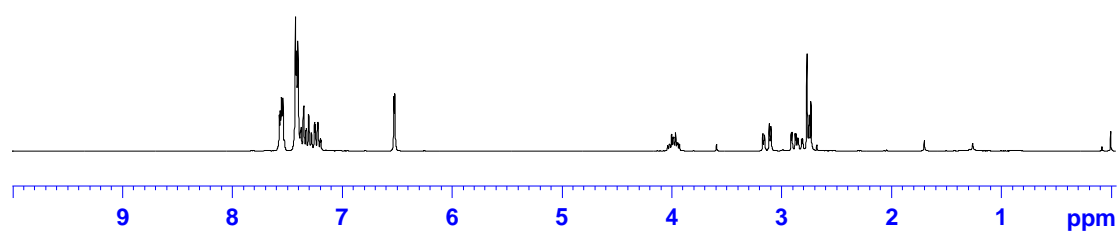

198.90

2.09

4.33

3.04

1.00

1.03

1.01

1.09

1.98

158.75

140.16

138.31

133.74

130.25

130.13

128.86

128.25

127.37

127.23

126.23

125.15

77.49

77.06

76.64

42.54

37.19

34.56

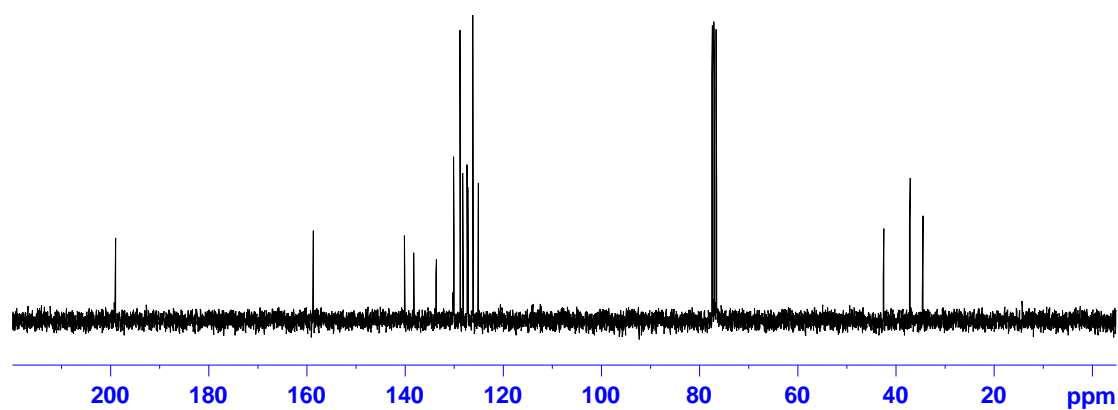

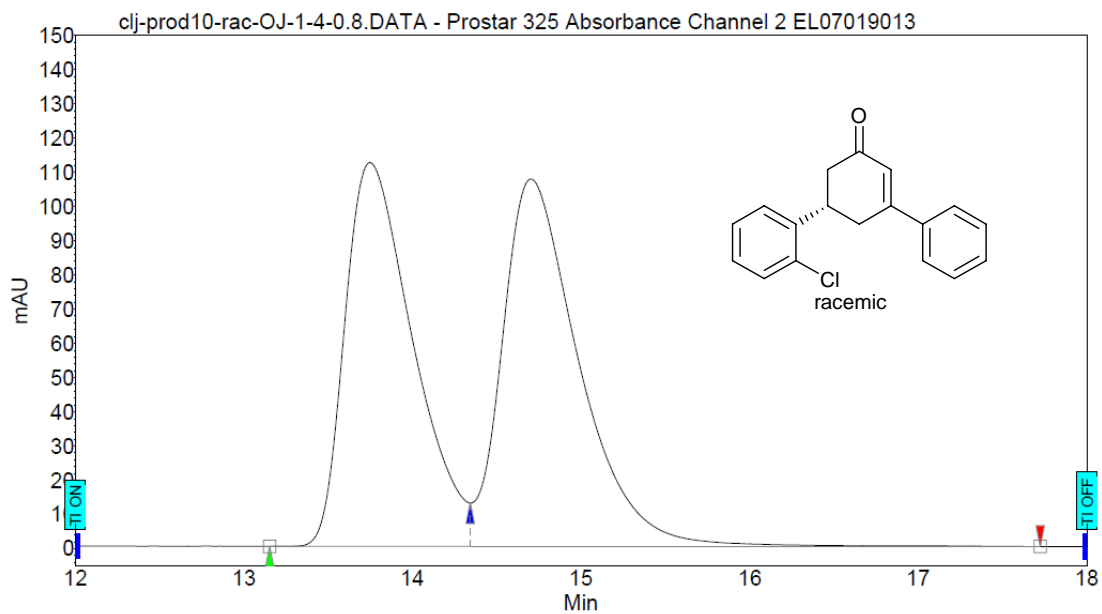

Peak results :

| Index | Name    | Time [Min] | Quantity [% Area] | Height [mAU] | Area [mAU.Min] | Area % [%] |
|-------|---------|------------|-------------------|--------------|----------------|------------|
| 1     | UNKNOWN | 13.75      | 47.95             | 112.2        | 52.3           | 47.955     |
| 2     | UNKNOWN | 14.70      | 52.05             | 107.4        | 56.7           | 52.045     |
| Total |         |            | 100.00            | 219.6        | 109.0          | 100.000    |

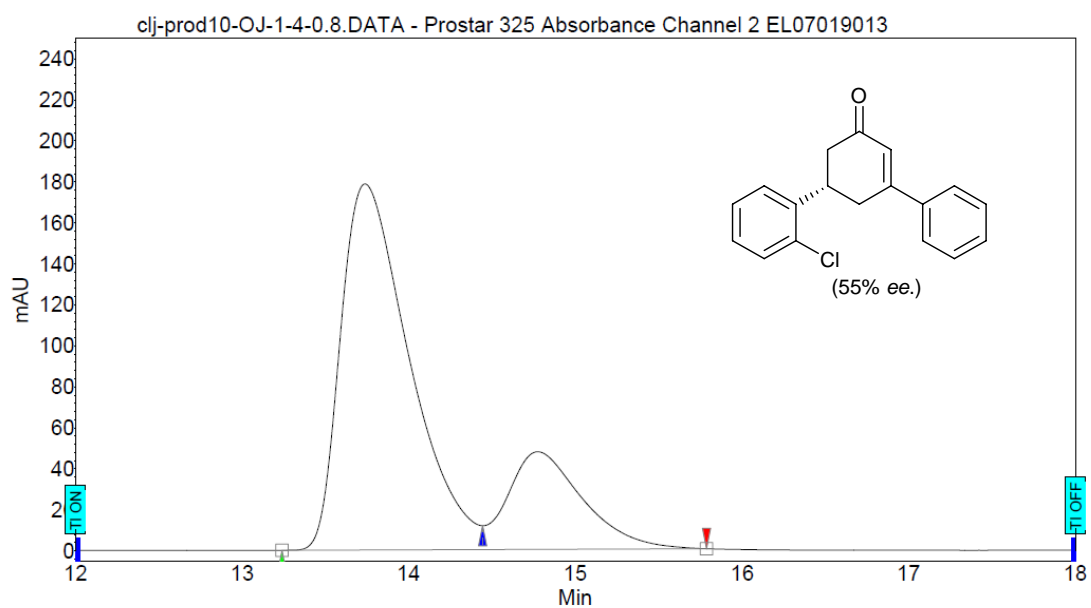

Peak results :

| Index | Name    | Time [Min] | Quantity [% Area] | Height [mAU] | Area [mAU.Min] | Area % [%] |
|-------|---------|------------|-------------------|--------------|----------------|------------|
| 1     | UNKNOWN | 13.74      | 77.50             | 178.6        | 85.0           | 77.499     |
| 2     | UNKNOWN | 14.77      | 22.50             | 47.6         | 24.7           | 22.501     |
| Total |         |            | 100.00            | 226.2        | 109.7          | 100.000    |

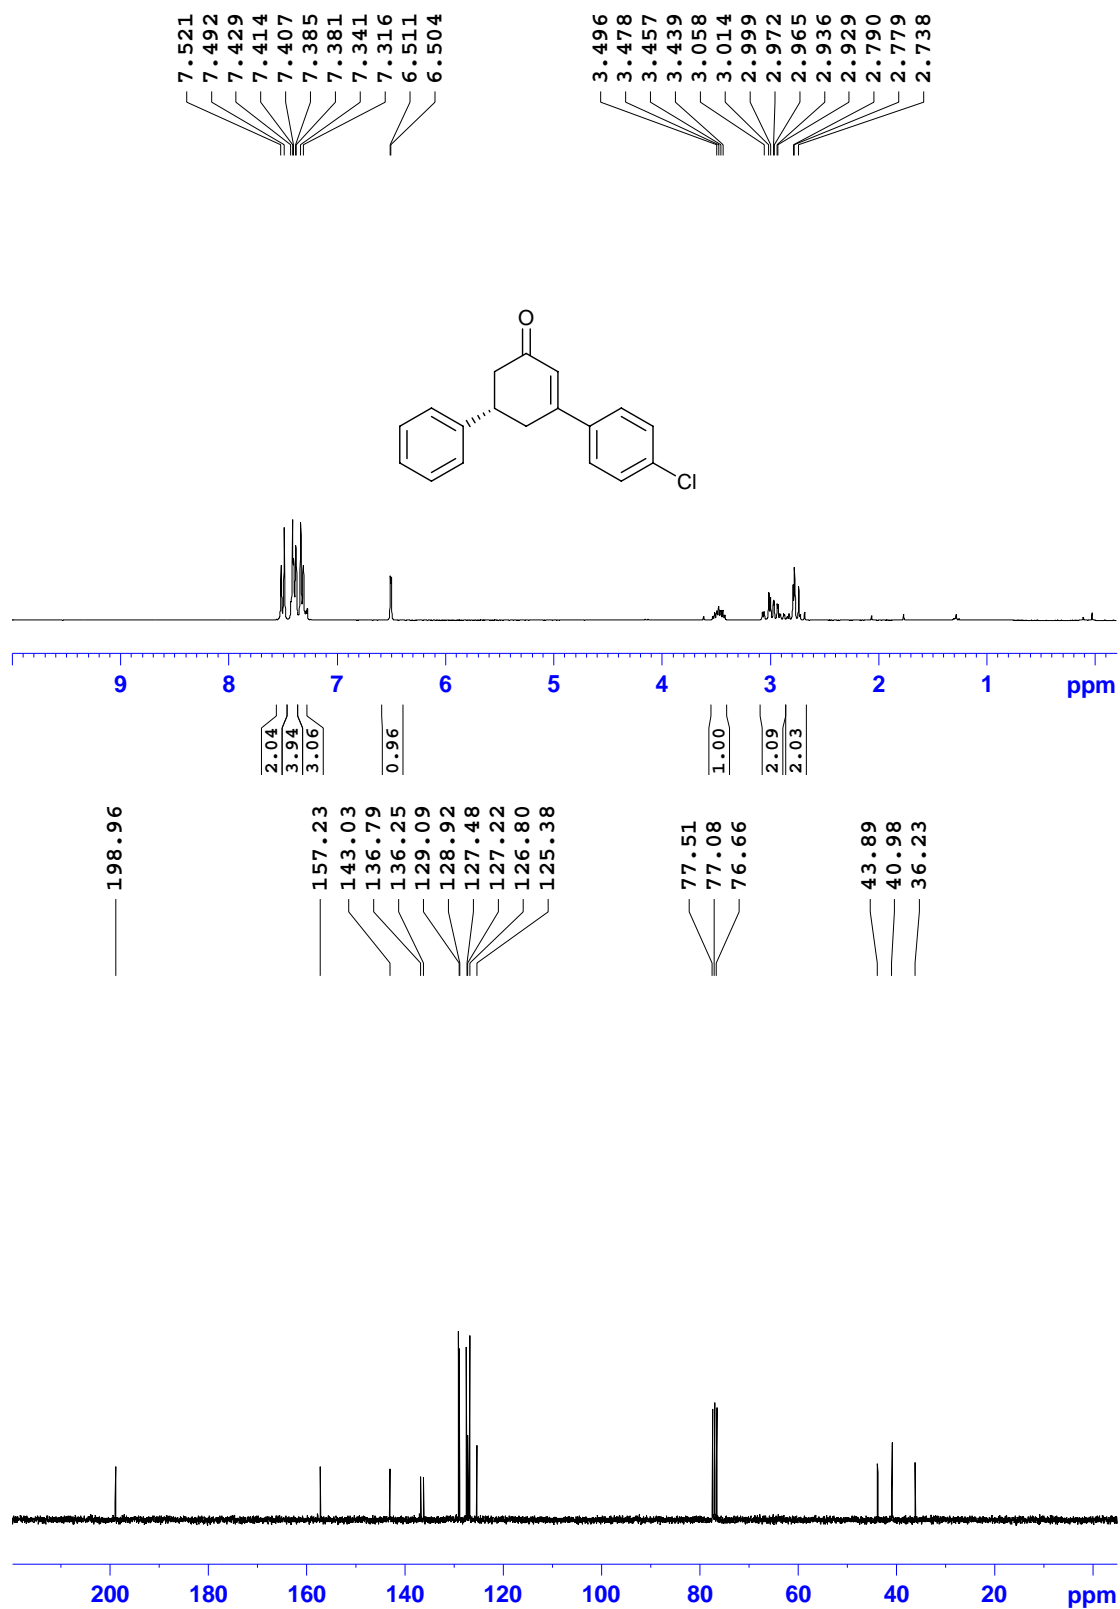



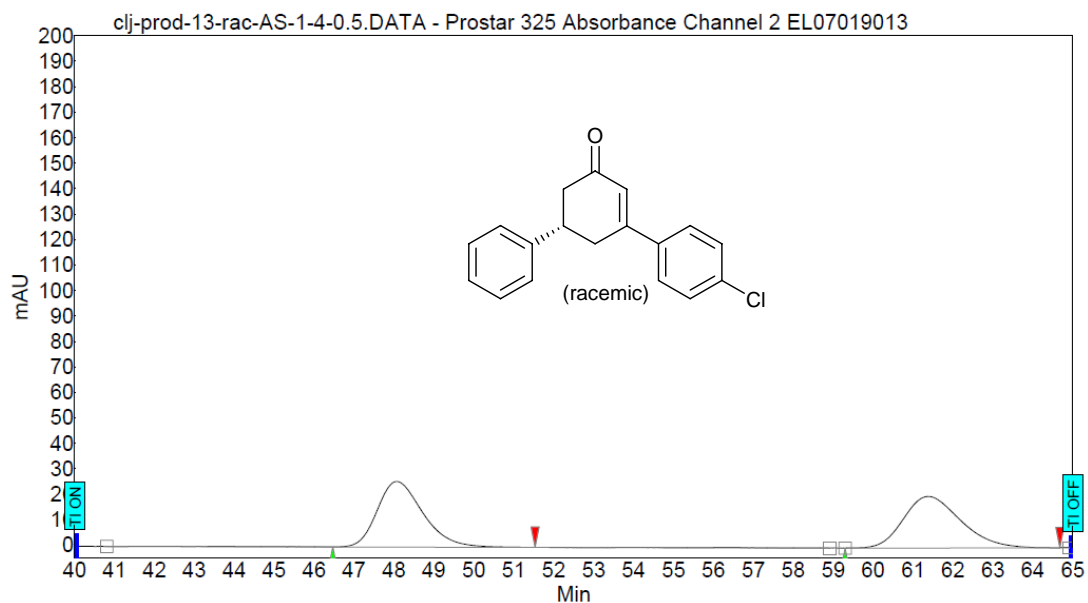

Peak results :

| Index | Name    | Time [Min] | Quantity [% Area] | Height [mAU] | Area [mAU.Min] | Area % [%] |
|-------|---------|------------|-------------------|--------------|----------------|------------|
| 1     | UNKNOWN | 48.07      | 50.38             | 25.8         | 34.3           | 50.377     |
| 2     | UNKNOWN | 61.37      | 49.62             | 20.3         | 33.8           | 49.623     |
| Total |         |            | 100.00            | 46.0         | 68.1           | 100.000    |

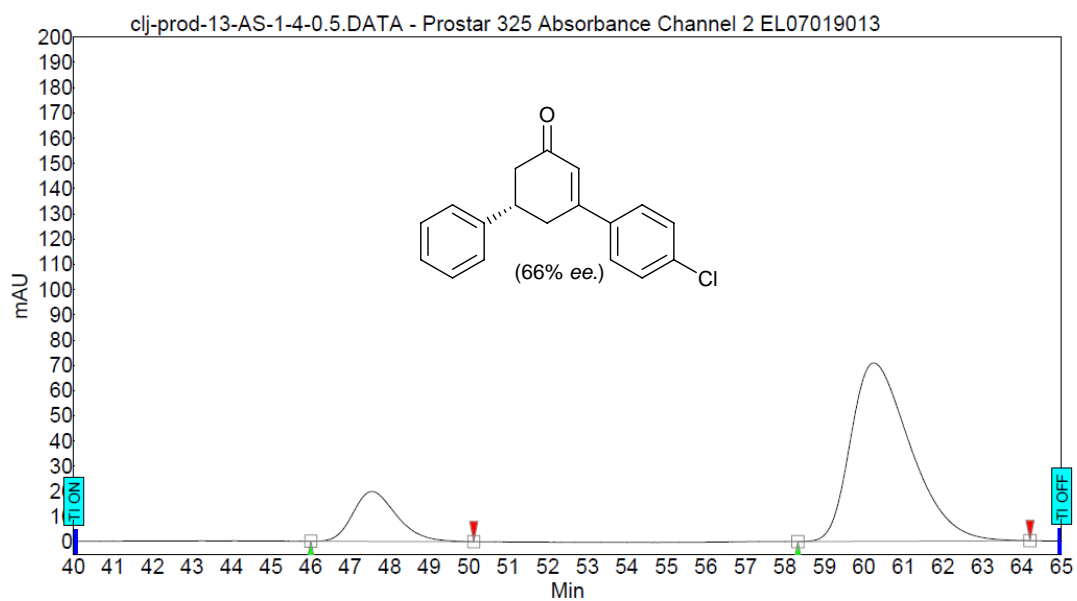

Peak results :

| Index | Name    | Time [Min] | Quantity [% Area] | Height [mAU] | Area [mAU.Min] | Area % [%] |
|-------|---------|------------|-------------------|--------------|----------------|------------|
| 1     | UNKNOWN | 47.55      | 16.96             | 19.8         | 25.3           | 16.957     |
| 2     | UNKNOWN | 60.25      | 83.04             | 70.7         | 123.7          | 83.043     |
| Total |         |            | 100.00            | 90.4         | 149.0          | 100.000    |

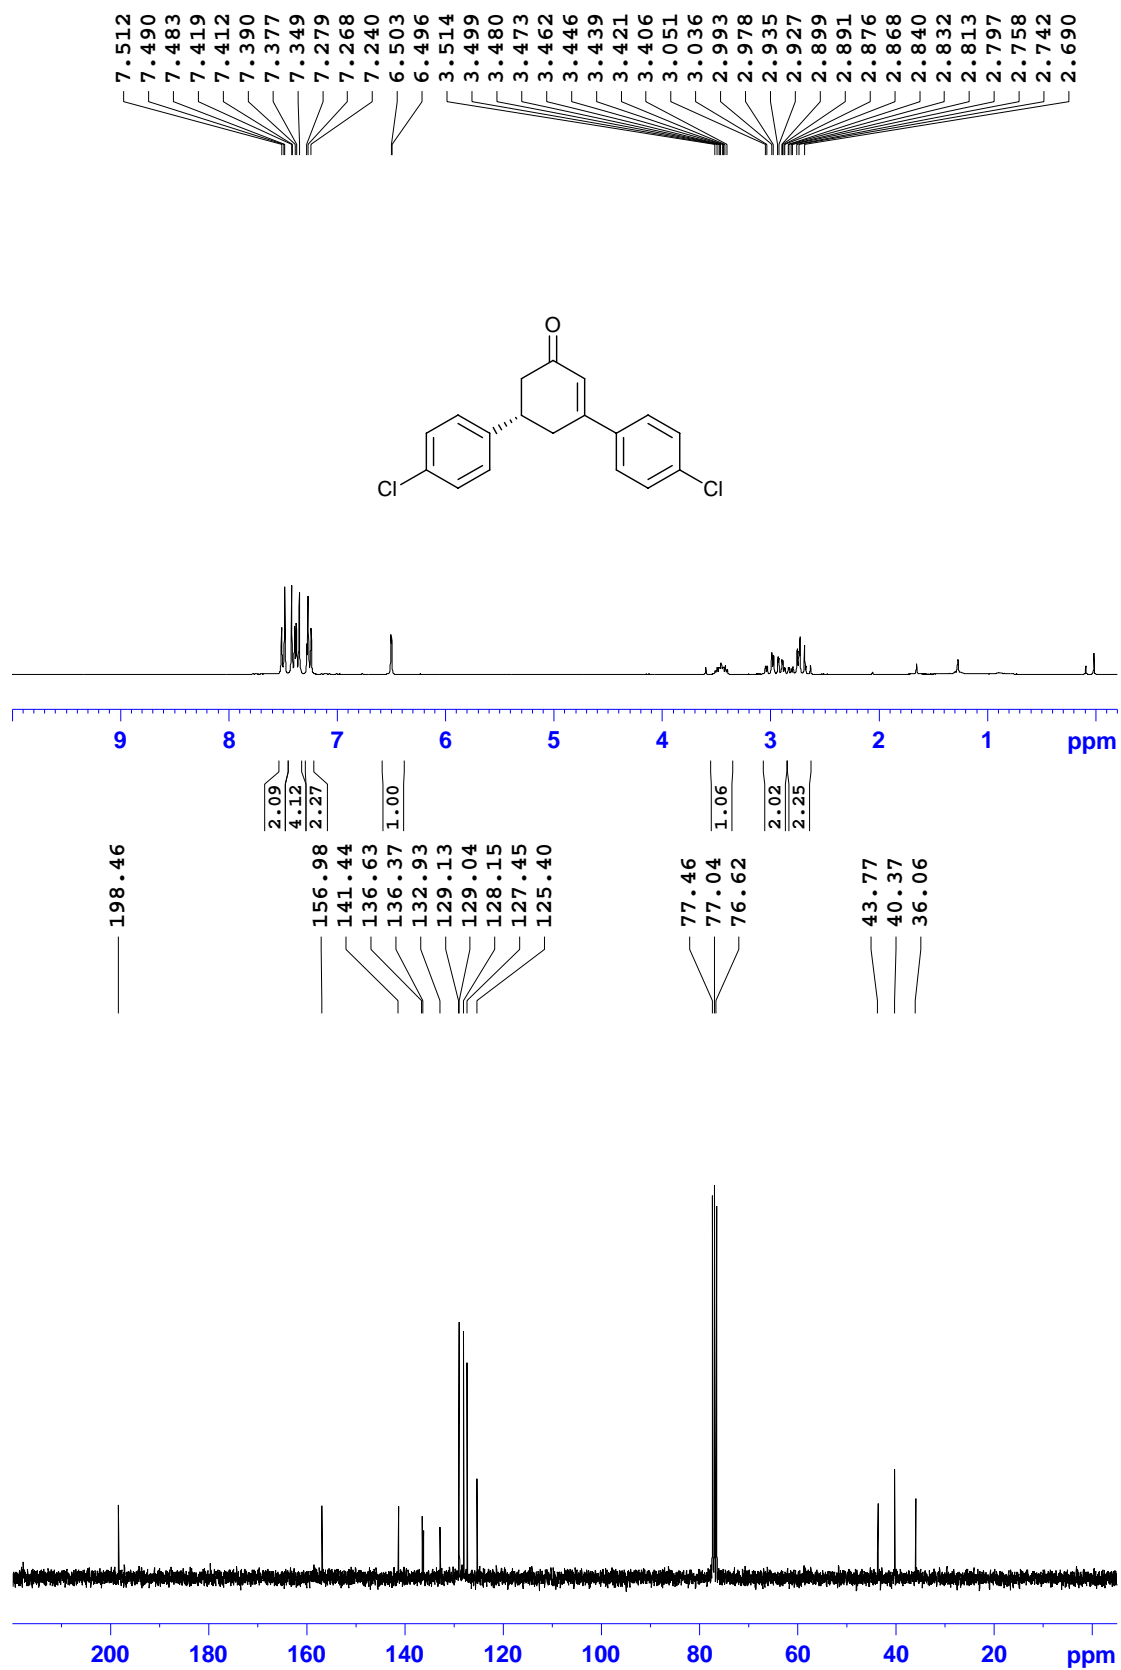

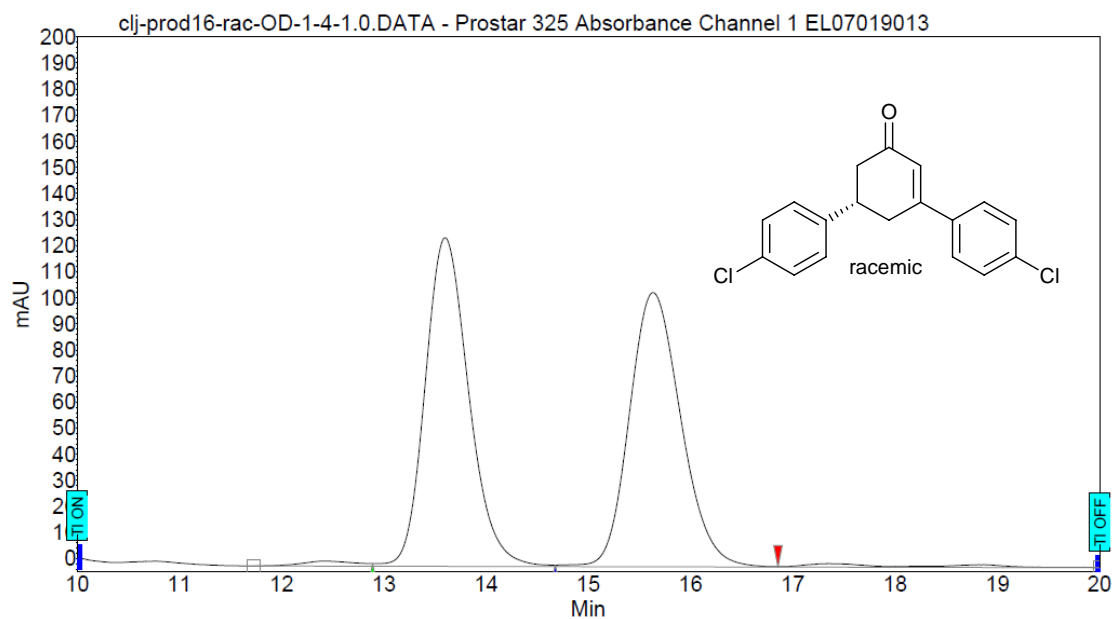

Peak results :

| Index | Name    | Time [Min] | Quantity [% Area] | Height [mAU] | Area [mAU.Min] | Area % [%] |
|-------|---------|------------|-------------------|--------------|----------------|------------|
| 1     | UNKNOWN | 13.60      | 50.41             | 126.0        | 62.3           | 50.409     |
| 2     | UNKNOWN | 15.63      | 49.59             | 105.1        | 61.3           | 49.591     |
| Total |         |            | 100.00            | 231.1        | 123.6          | 100.000    |

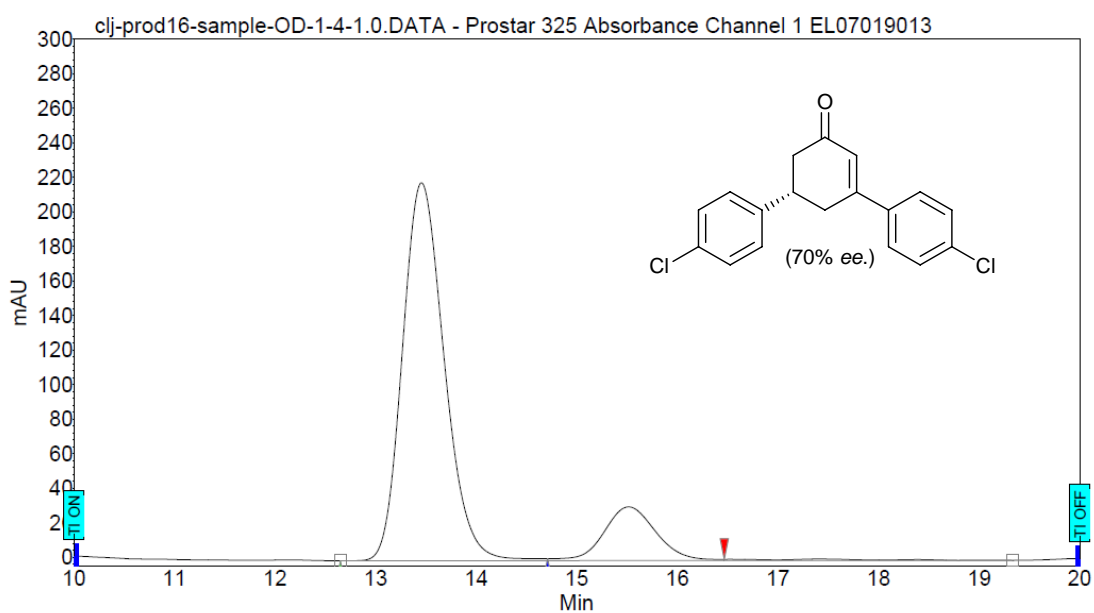

Peak results :

| Index | Name    | Time [Min] | Quantity [% Area] | Height [mAU] | Area [mAU.Min] | Area % [%] |
|-------|---------|------------|-------------------|--------------|----------------|------------|
| 1     | UNKNOWN | 13.46      | 84.98             | 218.8        | 105.0          | 84.976     |
| 2     | UNKNOWN | 15.52      | 15.02             | 31.1         | 18.6           | 15.024     |
| Total |         |            | 100.00            | 249.9        | 123.6          | 100.000    |
